# Supplementary material
Source: PubMed Central journal article supplement (PMC3479317)
Supplement: NIHMS391230-supplement-1_si_001.pdf [file NIHMS391230-supplement-1_si_001.pdf]

**Iron-Catalyzed Alkylations of Aryl Sulfamates and Carbamates**

Amanda L. Silberstein, Stephen D. Ramgren, and Neil K. Garg\*

*Department of Chemistry and Biochemistry, University of California, Los Angeles, California 90095*Supporting Information – Table of Contents

|                                                                      |            |
|----------------------------------------------------------------------|------------|
| <b>Materials and Methods</b> .....                                   | <b>S1</b>  |
| <b>Experimental Procedures</b> .....                                 | <b>S2</b>  |
| <b>A. Synthesis of Aryl Sulfamate and Carbamate Substrates</b> ..... | <b>S2</b>  |
| <b>B. Cross-Couplings of Aryl Sulfamates and Carbamate</b> .....     | <b>S2</b>  |
| <b>C. Synthesis of Grignard Reagents</b> .....                       | <b>S13</b> |
| <b>D. Synthetic Application</b> .....                                | <b>S16</b> |
| <b>E. Key Optimization Studies</b> .....                             | <b>S18</b> |
| <b>F. Analysis of Trace Metal Impurities</b> .....                   | <b>S19</b> |
| <b><sup>1</sup>H and <sup>13</sup>C NMR Spectra</b> .....            | <b>S21</b> |
| <b>References</b> .....                                              | <b>S63</b> |

**Materials and Methods.** Unless stated otherwise, reactions were conducted in flame-dried glassware under an atmosphere of nitrogen using anhydrous solvents (either freshly distilled or passed through activated alumina columns). Unless otherwise stated, commercially obtained reagents were used as received. Commercial Grignard reagents were titrated,<sup>1</sup> and then used without further purification. Non-commercially available Grignard reagents were synthesized following protocols specified in Section C of the SI. Anhydrous FeCl<sub>2</sub> (98%) was obtained from Strem Chemicals and SIMes•HCl (**3**) was obtained from either Sigma Aldrich or Materia Inc. Reaction temperatures were controlled using an IKAmag temperature modulator, and unless stated otherwise, reactions were performed at room temperature (rt, approximately 23 °C). Thin-layer chromatography (TLC) was conducted with EMD gel 60 F254 pre-coated plates (0.25 mm) and visualized using a combination of UV, anisaldehyde, ceric ammonium molybdate, iodine, vanillin, and potassium permanganate staining. Silicycle SiliaFlash P60 (particle size 0.040–0.063 mm) was used for flash column chromatography. <sup>1</sup>H NMR spectra were recorded on Bruker spectrometers (at 300, 400, 500, and 600 MHz) and are reported relative to deuterated solvent signals. Data for <sup>1</sup>H NMR spectra are reported as follows: chemical shift (δ ppm), multiplicity, coupling constant (Hz) and integration. <sup>13</sup>C NMR spectra were recorded on Bruker Spectrometers (at 75, 125, and 150 MHz). Data for <sup>13</sup>C NMR spectra are reported in terms of chemical shift. IR spectra were recorded on a Perkin-Elmer 100 spectrometer and are reported in terms of frequency of absorption (cm<sup>-1</sup>). Melting points are uncorrected and were obtained on a Laboratory Devices Mel-Temp II instrument. High resolution mass spectra were obtained from either the UC Los Angeles (ICT Premier) or UC Irvine Mass Spectrometry Facility. Inductively coupled plasma optical emission spectroscopy was obtained on a TJA Radial IRIS 1000 instrument and reported in parts per million (ppm).

## Experimental Procedures.

### A. Synthesis of Aryl Carbamate and Sulfamate Substrates

*Note:* Supporting information for the synthesis of the aryl sulfamates and carbamate shown in Tables 1, 2, and 3 have previously been reported,<sup>2</sup> with the exception of the benzofuran carbamate **SI-2** shown below.

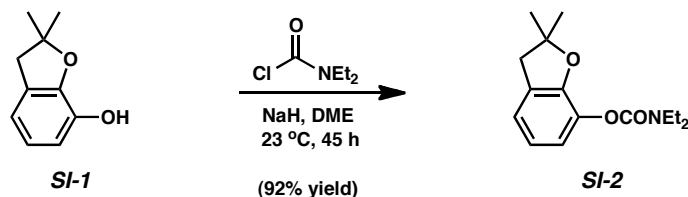

**SI-2 (Table 2, entry 6b).** A round bottom flask was charged with NaH (0.88 g, 21.92 mmol, 1.2 equiv, 60% dispersion in oil). A solution of dihydrobenzofuranol **SI-1** (3.0 mL, 18.27 mmol, 1 equiv) in DME (40 mL) was added dropwise via cannula to the NaH. A solution of *N,N*-diethylcarbamoyl chloride (2.2 mL, 17.36 mmol, 0.95 equiv) in DME (30 mL) was then added dropwise via cannula to the reaction vessel. The reaction was stirred at 23 °C for 45 h. After quenching with water (10 mL), the volatiles were removed under reduced pressure, and then Et<sub>2</sub>O (30 mL) and H<sub>2</sub>O (20 mL) were added. The layers were separated, and the organic layer was washed successively with 1 M KOH (20 mL) and H<sub>2</sub>O (20 mL). The combined aqueous layers were extracted with Et<sub>2</sub>O (3 x 20 mL). The combined organic layers were then washed with brine (20 mL), dried over MgSO<sub>4</sub>, and evaporated to dryness. The crude residue was purified by flash chromatography (7:1 Hexanes:EtOAc) to yield carbamate **SI-2** as a clear oil (1.0 g, 92% yield). *R*<sub>f</sub> 0.4 (100% Benzene); <sup>1</sup>H NMR (400 MHz, CDCl<sub>3</sub>): δ 6.95 (dd, *J* = 7.5, 1.5, 1H), 6.91 (app d, *J* = 8.0, 1H), 6.76 (app t, *J* = 7.5, 1H), 3.44–3.38 (m, 4H), 3.01 (s, 2H), 1.47 (s, 6H), 1.26–1.20 (m, 6H); <sup>13</sup>C NMR (125 MHz, CDCl<sub>3</sub>): δ 153.8, 150.6, 135.4, 129.3, 121.9, 121.8, 119.9, 87.8, 43.1, 42.3, 42.1, 28.2, 14.1, 13.4; IR (film): 2974, 2934, 1718, 1416, 1152, 1052 cm<sup>-1</sup>; HRMS-ESI (*m/z*) [*M* + Na]<sup>+</sup> calcd for C<sub>15</sub>H<sub>21</sub>NO<sub>3</sub>Na, 286.1419; found, 286.1420.

### B. Cross-Couplings of Aryl Carbamates and Sulfamates

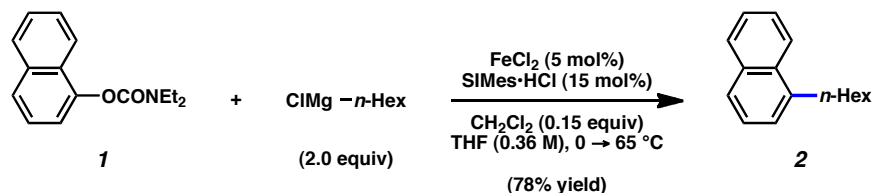

**Representative Procedure (coupling of naphthylcarbamate 1, Table 1, entry 1b) is used as an example.** **2.** A flame-dried 4-mL reaction vial was charged with FeCl<sub>2</sub> (2.6 mg, 0.02 mmol, 5 mol%), SIMes·HCl (20.6 mg, 0.06 mmol, 15 mol%), the carbamate substrate **1** (97.3 mg, 0.40 mmol, 1 equiv) and a magnetic stir bar, all in a glove box. The vessel was removed from the glove box, and then placed under an atmosphere of N<sub>2</sub> on the bench. THF (0.62 mL) and CH<sub>2</sub>Cl<sub>2</sub> (3.9 μL, 0.06 mmol, 0.15 equiv) were added and the resulting suspension was cooled to 0 °C. Next, a solution of *n*-hexylmagnesium chloride in THF (1.6 M in THF, 0.5 mL, 0.8 mmol, 2.0 equiv) was added slowly. The vial was sealed and heated to 65 °C for 3 h. After cooling the reaction vessel to 23 °C, the reaction was quenched with saturated aqueous NH<sub>4</sub>Cl (2 mL). The layers were separated; the aqueous layer was extracted with EtOAc (2 x 3 mL). The combined organic layers were then washed with brine (3 mL),

dried over  $\text{MgSO}_4$ , and concentrated under reduced pressure. The crude residue was purified by flash chromatography (100% Pentanes) to yield 1-*n*-hexylnaphthylene **2** as a colorless oil (84.9 mg, 78% yield) and naphthalene (4.6 mg, 9% yield) as an inseparable mixture.  $R_f$  0.66 (100% Pentanes). Spectral data match those previously reported.<sup>3</sup>

Any modifications of the conditions shown in this representative procedure are specified in the following schemes, which depict all of the results shown in Tables 1, 2, and 3. Note: Reactions can be set up outside of the glove box using a suspension of anhydrous  $\text{FeCl}_2$  in THF and  $\text{CH}_2\text{Cl}_2$  stored under inert atmosphere.

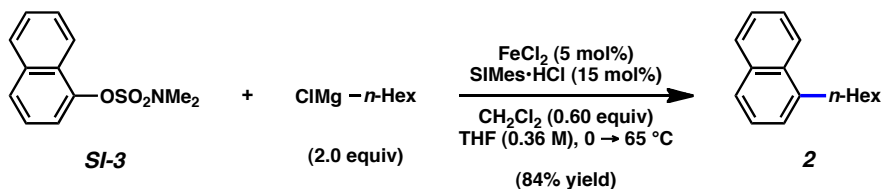

**2** (Table 1, entry 1a). Purification by flash chromatography (100% Pentanes) afforded cross-coupled product **2** (84% yield) and naphthalene (16% yield) as an inseparable mixture.  $R_f$  0.61 (100% Pentanes). Spectral data match those previously reported.<sup>3</sup>

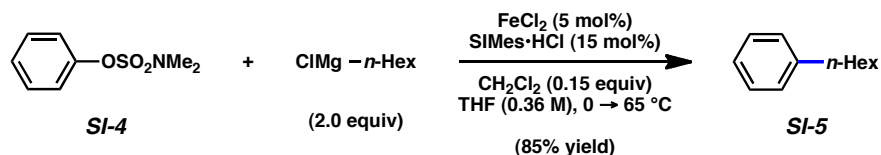

**SI-5** (Table 1, entry 2a). Purification by flash chromatography (100% Hexanes) yielded cross-coupled product **SI-5** (85% yield) as a clear oil.  $R_f$  0.77 (100% Hexanes). Spectral data match those previously reported.<sup>4</sup>

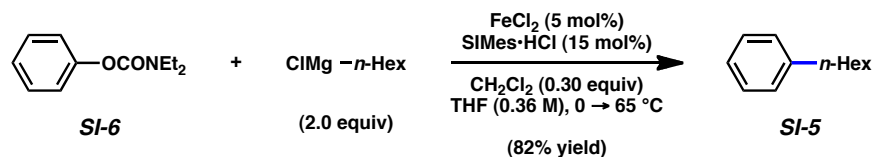

**SI-5** (Table 1, entry 2b). Purification by flash chromatography (100% Hexanes) produced alkylated product **SI-5** (82% yield) as a clear oil.  $R_f$  0.77 (100% Hexanes). Spectral data match those previously reported.<sup>4</sup>

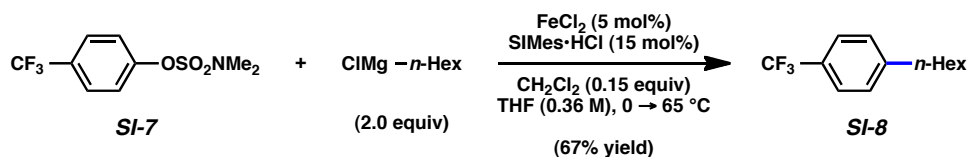

**SI-8 (Table 1, entry 3a).** Purification by flash chromatography (1:1 Hexanes:Benzene) afforded cross-coupled product **SI-8** (67% yield) as a clear oil.  $R_f$  0.88 (1:1 Pentanes:Benzene). Spectral data match those previously reported.<sup>5</sup>

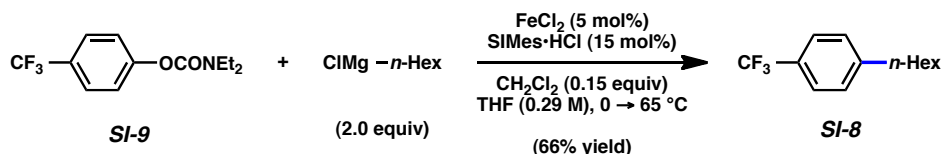

**SI-8 (Table 1, entry 3b).** Purification by flash chromatography (1:1 Hexanes:Benzene) supplied cross-coupled product **SI-8** (66% yield) as a clear oil.  $R_f$  0.88 (1:1 Pentanes:Benzene). Spectral data match those previously reported.<sup>5</sup>

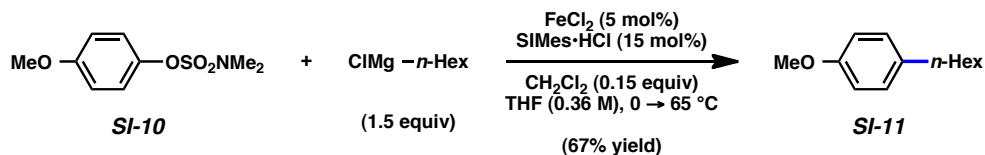

**SI-11 (Table 1, entry 4a).** Purification by flash chromatography (20:1 Pentanes:Benzene) yielded cross-coupled product **SI-11** (67% yield) as a clear oil.  $R_f$  0.32 (20:1 Pentanes:Benzene). Spectral data match those previously reported.<sup>6</sup>

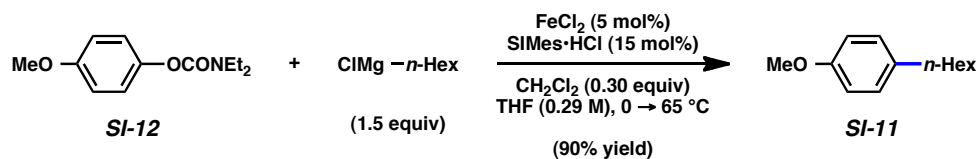

**SI-11 (Table 1, entry 4b).** Purification by flash chromatography (20:1 Pentanes:Benzene) produced alkylated product **SI-11** (90% yield) as a clear oil.  $R_f$  0.32 (20:1 Pentanes:Benzene). Spectral data match those previously reported.<sup>6</sup>

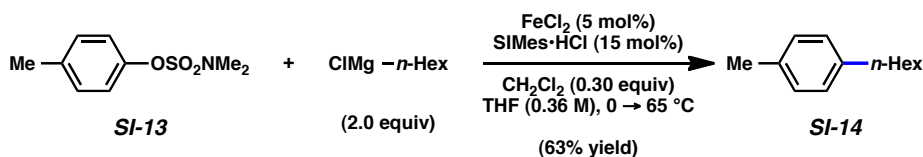

**SI-14 (Table 1, entry 5a).** Purification by flash chromatography (20:1 Pentanes:Benzene) afforded cross-coupled product **SI-14** (63% yield) as a clear oil.  $R_f$  0.84 (20:1 Pentanes:Benzene). Spectral data match those previously reported.<sup>6</sup>

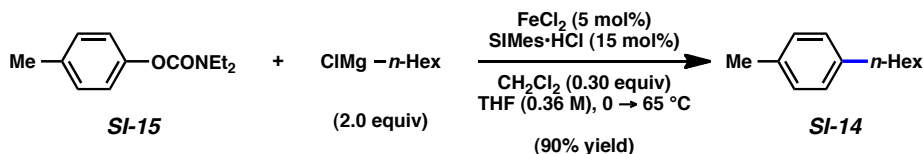

**SI-14 (Table 1, entry 5b).** Purification by flash chromatography (20:1 Pentanes:Benzene) supplied cross-coupled product **SI-14** (90% yield) as a clear oil.  $R_f$  0.84 (20:1 Pentanes:Benzene). Spectral data match those previously reported.<sup>6</sup>

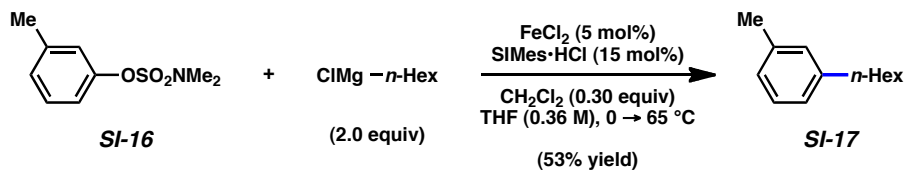

**SI-17 (Table 1, entry 6a).** Purification by flash chromatography (20:1 Pentanes:Benzene) yielded cross-coupled product **SI-17** (53% yield) as a clear oil.  $R_f$  0.84 (20:1 Pentanes:Benzene). Spectral data match those previously reported.<sup>7</sup>

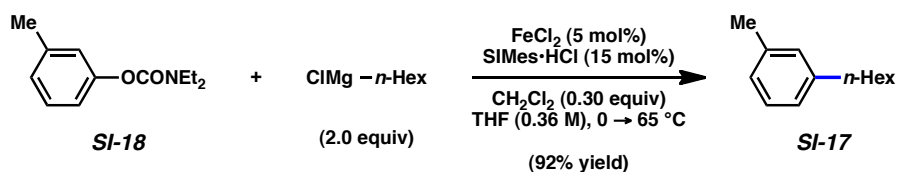

**SI-17 (Table 1, entry 6b).** Purification by flash chromatography (20:1 Pentanes:Benzene) produced alkylated product **SI-17** (92% yield) as a clear oil.  $R_f$  0.84 (20:1 Pentanes:Benzene). Spectral data match those previously reported.<sup>7</sup>

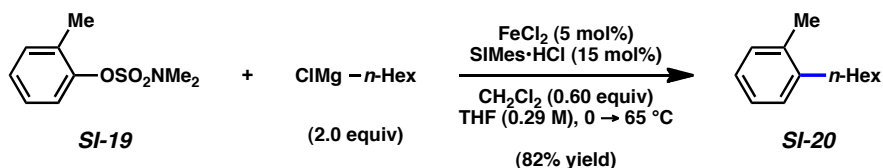

**SI-20 (Table 2, entry 1a).** Purification by flash chromatography (20:1 Pentanes:Benzene) afforded cross-coupled product **SI-20** (82% yield) as a clear oil.  $R_f$  0.68 (20:1 Pentanes:Benzene). Spectral data match those previously reported.<sup>4</sup>

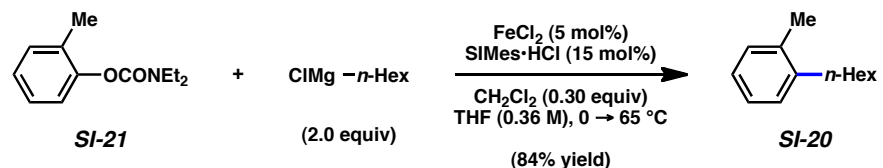

**SI-20 (Table 2, entry 1b).** Purification by flash chromatography (20:1 Pentanes:Benzene) supplied cross-coupled product **SI-20** (84% yield) as a clear oil.  $R_f$  0.68 (20:1 Pentanes:Benzene). Spectral data match those previously reported.<sup>4</sup>

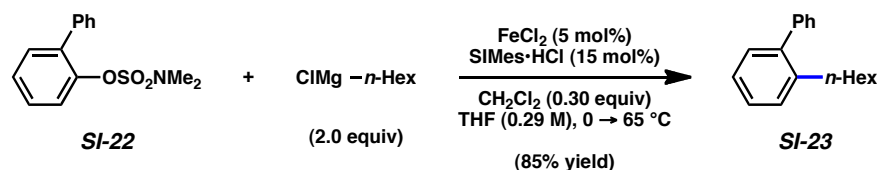

**SI-23 (Table 2, entry 2a).** Purification by flash chromatography (20:1 Pentanes:Benzene) yielded cross-coupled product **SI-23** (85% yield) as a clear oil.  $R_f$  0.79 (20:1 Pentanes:Benzene). Spectral data match those previously reported.<sup>8</sup>

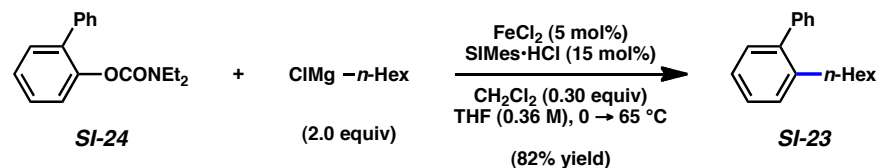

**SI-23 (Table 2, entry 2b).** Purification by flash chromatography (20:1 Pentanes:Benzene) produced product **SI-23** (82% yield) as a clear oil.  $R_f$  0.79 (20:1 Pentanes:Benzene). Spectral data match those previously reported.<sup>8</sup>

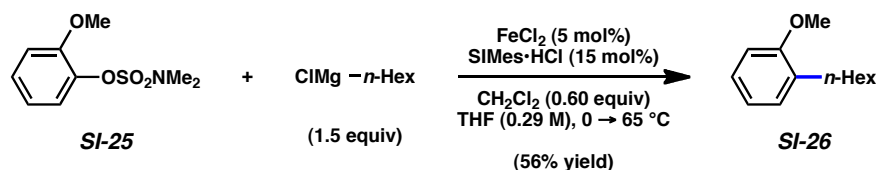

**SI-26 (Table 2, entry 3a).** Purification by flash chromatography (20:1 Pentanes:Benzene) afforded cross-coupled product **SI-26** (56% yield) as a clear oil.  $R_f$  0.42 (20:1 Pentanes:Benzene). Spectral data match those previously reported.<sup>9</sup>

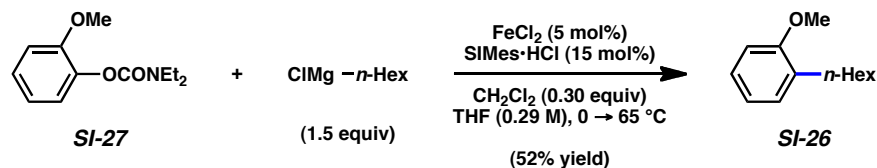

**SI-26 (Table 2, entry 3b).** Purification by flash chromatography (20:1 Pentanes:Benzene) supplied cross-coupled product **SI-26** (52% yield) as a clear oil.  $R_f$  0.42 (20:1 Pentanes:Benzene). Spectral data match those previously reported.<sup>9</sup>

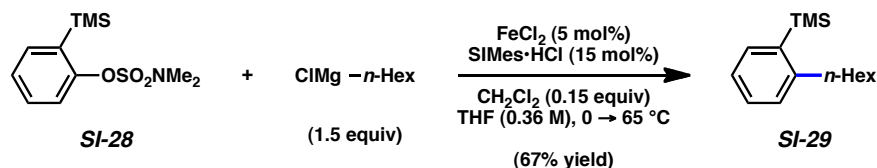

**SI-29 (Table 2, entry 4a).** Purification by flash chromatography (100% Pentanes) yielded cross-coupled product **SI-29** (67% yield) as a clear oil.  $R_f$  0.80 (100% Pentanes).  $^1\text{H}$  NMR (500 MHz,  $\text{CDCl}_3$ ):  $\delta$  7.47 (dd,  $J = 7.4, 1.3$ , 1H), 7.31 (td,  $J = 7.5, 1.4$ , 1H), 7.21 (d,  $J = 7.6$ , 1H), 7.16 (td,  $J = 7.3, 1.2$ , 1H), 2.70 (t,  $J = 8.2$ , 2H); 1.65–1.57 (m, 2H), 1.45–1.38 (m, 2H), 1.34–1.31 (m, 4H), 0.90 (t,  $J = 6.9$ , 3H), 0.32 (s, 9H);  $^{13}\text{C}$  NMR (125 MHz,  $\text{CDCl}_3$ ):  $\delta$  149.0, 138.0, 134.6, 129.3, 128.7, 125.1, 36.6, 32.8, 32.0, 29.8, 22.8, 14.2, 0.6; IR (film): 3054, 2955, 2928, 2858, 1249, 849, 836  $\text{cm}^{-1}$ ; HRMS-EI ( $m/z$ ) [ $M$ ] $^+$  calcd for  $\text{C}_{15}\text{H}_{26}\text{Si}$ , 234.1804; found 234.1792.

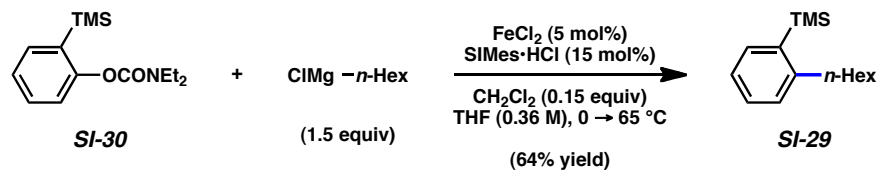

**SI-29 (Table 2, entry 4b).** Purification by flash chromatography (100% Pentanes) generated alkylated product **SI-29** (64% yield) as a clear oil.  $R_f$  0.80 (100% Pentanes).  $^1\text{H}$  NMR (500 MHz,  $\text{CDCl}_3$ ):  $\delta$  7.47 (dd,  $J = 7.4, 1.3$ , 1H), 7.31 (td,  $J = 7.5, 1.4$ , 1H), 7.21 (d,  $J = 7.6$ , 1H), 7.16 (td,  $J = 7.3, 1.2$ , 1H), 2.70 (t,  $J = 8.2$ , 2H); 1.65–1.57 (m, 2H), 1.45–1.38 (m, 2H), 1.34–1.31 (m, 4H), 0.90 (t,  $J = 6.9$ , 3H), 0.32 (s, 9H);  $^{13}\text{C}$  NMR (125 MHz,  $\text{CDCl}_3$ ):  $\delta$  149.0, 138.0, 134.6, 129.3, 128.7, 125.1, 36.6, 32.8, 32.0, 29.8, 22.8, 14.2, 0.6; IR (film): 3054, 2955, 2928, 2858, 1249, 849, 836  $\text{cm}^{-1}$ ; HRMS-EI ( $m/z$ ) [ $M$ ] $^+$  calcd for  $\text{C}_{15}\text{H}_{26}\text{Si}$ , 234.1804; found 234.1792.

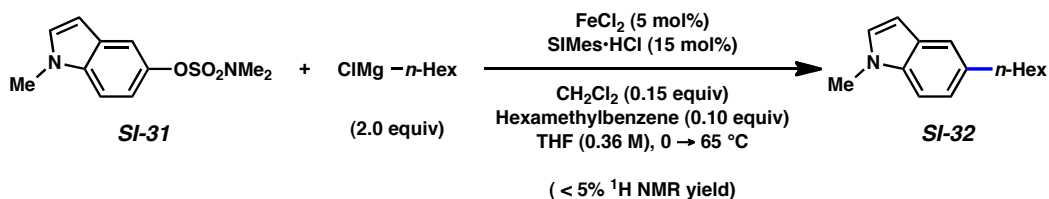

**SI-32 (Table 2, entry 5a).** The yield was determined by  $^1\text{H}$  NMR analysis with hexamethylbenzene as internal standard.

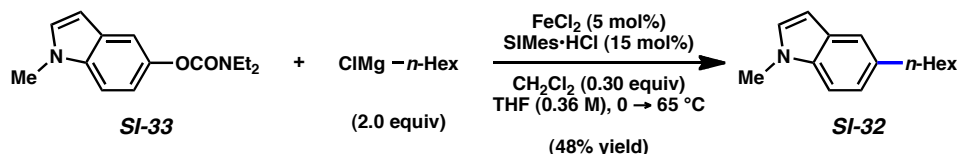

**SI-32 (Table 2, entry 5b).** Purification by flash chromatography (10:1 Hexanes:EtOAc) afforded cross-coupled product **SI-32** (48% yield) as a clear oil.  $R_f$  0.59 (10:1 Hexanes:EtOAc).  $^1\text{H}$  NMR (500 MHz,  $\text{CDCl}_3$ ):  $\delta$  7.42 (d,  $J = 0.7$ , 1H), 7.24 (d,  $J = 8.4$ , 1H), 7.07 (dd,  $J = 8.4$ , 1.6, 1H), 7.01 (d,  $J = 3.1$ , 1H), 6.41 (dd,  $J = 3.1$ , 0.7, 1H), 3.77 (s, 3H), 2.70 (t, 7.6, 2H), 1.66 (quintet,  $J = 7.5$ , 2H), 1.40–1.27 (m, 6H), 0.89 (t,  $J = 6.8$ , 3H);  $^{13}\text{C}$  NMR (125 MHz,  $\text{CDCl}_3$ ):  $\delta$  135.4, 133.9, 128.9, 128.8, 122.7, 120.1, 109.0, 100.5, 36.2, 33.0, 32.5, 32.0, 29.2, 22.8, 14.3; IR (film): 2955, 2922, 2853, 1513, 1491, 1244  $\text{cm}^{-1}$ ; HRMS-ESI ( $m/z$ )  $[\text{M} + \text{H}]^+$  calcd for  $\text{C}_{15}\text{H}_{22}\text{N}$ , 216.1752; found 216.1755.

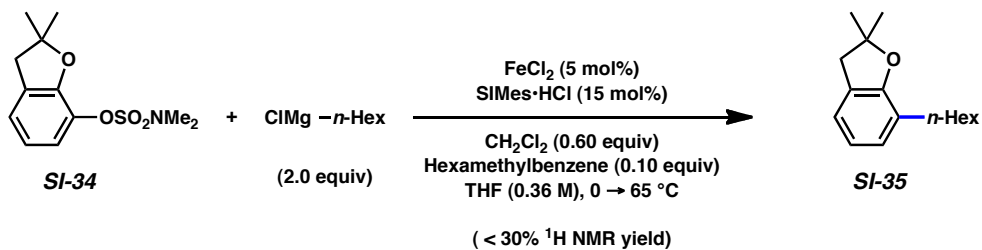

**SI-35 (Table 2, entry 6a).** The yield was determined by  $^1\text{H}$  NMR analysis with hexamethylbenzene as internal standard.

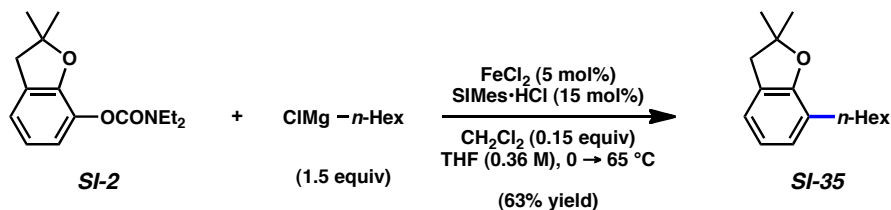

**SI-35 (Table 2, entry 6b).** Purification by flash chromatography (20:1 Pentanes:Benzene) afforded cross-coupled product **SI-35** (63% yield) as a clear oil.  $R_f$  0.78 (100% Benzene).  $^1\text{H}$  NMR (500 MHz,  $\text{CDCl}_3$ ):  $\delta$  6.97 (dd,  $J = 7.2$ , 1.0, 1H), 6.93 (d,  $J = 7.5$ , 1H), 6.74 (t,  $J = 7.4$ , 1H), 2.99 (s, 2H), 2.54 (t,  $J = 7.6$ , 2H), 1.59 (quintet,  $J = 7.5$ , 2H), 1.46 (s, 6H), 1.35–1.26 (m, 6H), 0.91–0.86 (m, 3H);  $^{13}\text{C}$  NMR (125 MHz,  $\text{CDCl}_3$ ):  $\delta$  157.3, 128.2, 126.6, 124.8, 122.6, 119.8, 85.9, 43.3, 31.9, 29.9, 29.7, 29.2, 28.4,



22.8, 14.3; IR (film): 2955, 2927, 2856, 1597, 1454, 1368, 1294, 1263, 1137  $\text{cm}^{-1}$ ; HRMS-EI ( $m/z$ )  $[\text{M}]^+$  calcd for  $\text{C}_{16}\text{H}_{24}\text{O}$ , 232.1827; found 232.1820.

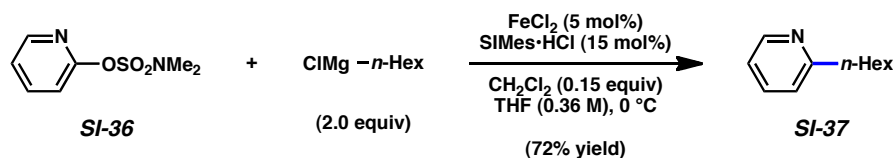

**SI-36 (Table 2, entry 7a).** Purification by flash chromatography (2:1 Hexanes:EtOAc) supplied cross-coupled product **SI-37** (72% yield) as a clear oil.  $R_f$  0.69 (2:1 Hexanes:EtOAc). Spectral data match those previously reported.<sup>10</sup>

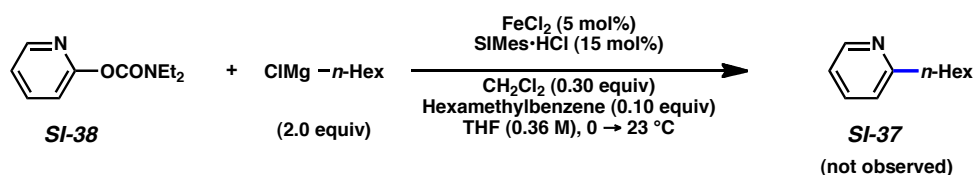

**SI-37 (Table 2, entry 7b).** **SI-37** was not observed, as determined by  $^1\text{H}$  NMR analysis with hexamethylbenzene as internal standard.

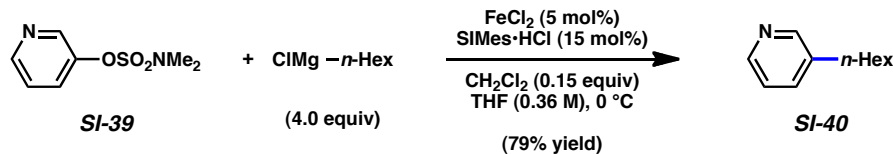

**SI-40 (Table 2, entry 8a).** Purification by flash chromatography (4:1 Hexanes:EtOAc) afforded cross-coupled product **SI-40** (79% yield) as a clear oil.  $R_f$  0.45 (2:1 Hexanes:EtOAc). Spectral data match those previously reported.<sup>11</sup>

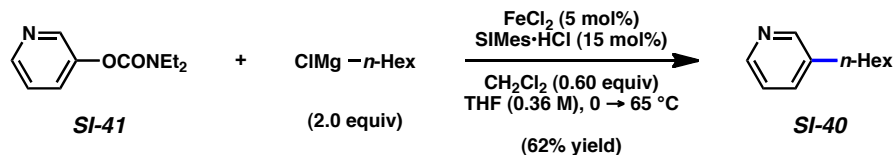

**SI-40 (Table 2, entry 8b).** Purification by flash chromatography (4:1 Hexanes:EtOAc) supplied cross-coupled product **SI-40** (62% yield) as a clear oil.  $R_f$  0.45 (2:1 Hexanes:EtOAc). Spectral data match those previously reported.<sup>11</sup>

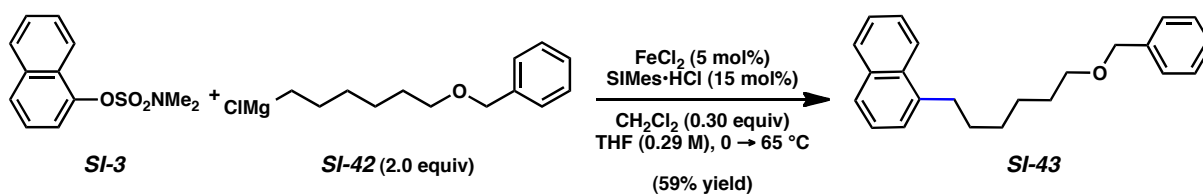

**SI-43 (Table 3, entry 1a).** Purification by flash chromatography (50:1:1 Hexanes:Benzene:EtOAc) yielded cross-coupled product **SI-43** (59% yield) as a yellow oil.  $R_f$  0.05 (50:1:1 Hexanes:Benzene:EtOAc).  $^1\text{H NMR}$  (600 MHz,  $\text{CDCl}_3$ ):  $\delta$  8.05 (d,  $J = 8.2$ , 1H), 7.86 (d,  $J = 7.6$ , 1H), 7.71 (d,  $J = 8.2$ , 1H), 7.25–7.46 (m, 2H), 7.40 (dd,  $J = 8.0$ , 7.2, 1H), 7.37–7.31 (m, 5H), 7.31–7.27 (m, 1H), 4.51 (s, 2H), 3.48 (t,  $J = 6.7$ , 2H), 3.08 (t,  $J = 7.9$ , 2H), 1.78 (quintet,  $J = 7.4$ , 2H), 1.65 (quintet,  $J = 6.7$ , 2H), 1.50–1.44 (m, 4H);  $^{13}\text{C NMR}$  (150 MHz,  $\text{CDCl}_3$ ):  $\delta$  139.0, 138.8, 134.0, 132.0, 128.8, 128.5, 127.7, 127.6, 126.5, 125.9, 125.7, 125.6, 125.5, 124.0, 73.0, 70.5, 33.2, 30.9, 29.9, 29.7, 26.2; IR (film): 3032, 2931, 2855, 1596, 1509, 1495, 1453, 1362, 1215, 1097, 1028  $\text{cm}^{-1}$ ; HRMS-ESI ( $m/z$ )  $[\text{M} + \text{H}]^+$  calcd for  $\text{C}_{23}\text{H}_{26}\text{OH}$ , 320.2096; found 320.2119.

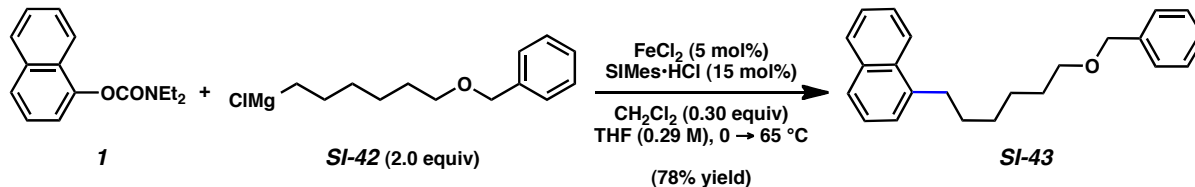

**SI-43 (Table 3, entry 1b).** Purification by flash chromatography (50:1:1 Hexanes:Benzene:EtOAc) generated alkylated product **SI-43** (78% yield) as a yellow oil.  $R_f$  0.05 (50:1:1 Hexanes:Benzene:EtOAc). See spectral data above.

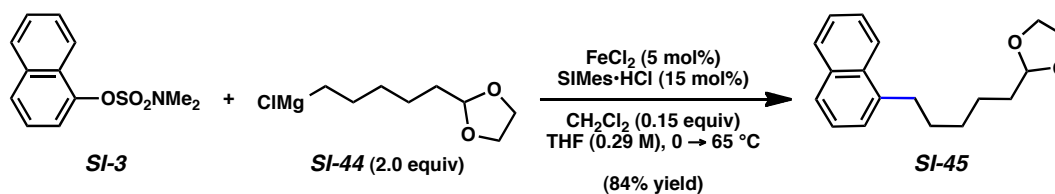

**SI-45 (Table 3, entry 2a).** Purification by flash chromatography (9:1 Hexanes:EtOAc) afforded cross-coupled product **SI-45** (84% yield) as a colorless oil.  $R_f$  0.27 (9:1 Hexanes:EtOAc).  $^1\text{H NMR}$  (600 MHz,  $\text{CDCl}_3$ ):  $\delta$  8.04 (d,  $J = 8.4$ , 1H), 7.86 (d,  $J = 7.9$ , 1H), 7.71 (d,  $J = 8.1$ , 1H), 7.52–7.46 (m, 2H), 7.39 (dd,  $J = 8.1$ , 7.1, 1H), 7.32 (d,  $J = 6.9$ , 1H), 4.86 (t,  $J = 4.9$ , 1H), 4.00–4.94 (m, 2H), 3.88–3.83 (m, 2H), 3.08 (t,  $J = 7.8$ , 2H), 1.81–1.76 (m, 2H), 1.71–1.67 (m, 2H), 1.55–1.47 (m, 4H);  $^{13}\text{C NMR}$  (150 MHz,  $\text{CDCl}_3$ ):  $\delta$  139.0, 134.1, 132.1, 128.9, 126.6, 126.0, 125.8, 125.6, 125.5, 124.0, 104.8, 65.0, 34.0, 33.1, 30.9, 29.8, 24.1; IR (film): 2934, 2859, 1395, 1129, 1032  $\text{cm}^{-1}$ ; HRMS-ESI ( $m/z$ )  $[\text{M} + \text{H}]^+$  calcd for  $\text{C}_{18}\text{H}_{22}\text{O}_2\text{H}$ , 271.1698; found 271.1695.

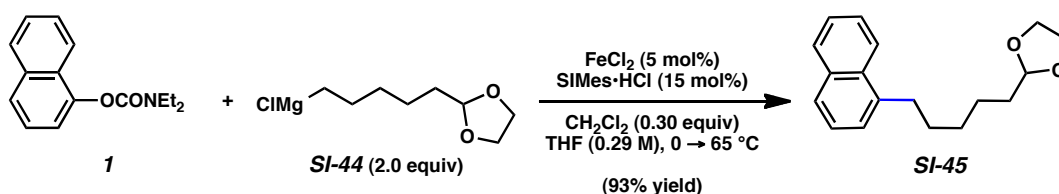

**SI-45 (Table 3, entry 2b).** Purification by flash chromatography (9:1 Hexanes:EtOAc) supplied cross-coupled product **SI-45** (93% yield) as a yellow oil.  $R_f$  0.27 (9:1 Hexanes:EtOAc). See spectral data above.

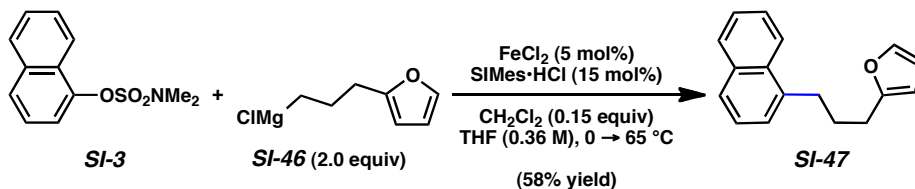

**SI-47 (Table 3, entry 3a).** Purification by flash chromatography (50:1:1 Hexanes:Benzene:EtOAc) afforded cross-coupled product **SI-47** (58% yield) as a yellow oil.  $R_f$  0.27 (50:1:1 Hexanes:Benzene:EtOAc).  $^1\text{H}$  NMR (600 MHz,  $\text{CDCl}_3$ ):  $\delta$  8.02 (d,  $J = 8.3$ , 1H), 7.88 (d,  $J = 8.2$ , 1H), 7.74 (d,  $J = 8.1$ , 1H), 7.54–7.48 (m, 2H), 7.42 (dd,  $J = 8.1$ , 7.2, 1H), 7.37–7.34 (m, 2H), 6.32 (dd,  $J = 3.0$ , 1.9, 1H), 6.06 (d,  $J = 2.6$ , 1H), 3.15 (t,  $J = 7.4$ , 2H), 2.78 (t,  $J = 7.4$ , 2H), 2.14 (quintet,  $J = 7.6$ , 2H);  $^{13}\text{C}$  NMR (150 MHz,  $\text{CDCl}_3$ ):  $\delta$  156.1, 141.0, 138.2, 134.1, 132.0, 128.9, 126.8, 126.2, 125.9, 125.7, 125.6, 123.9, 110.3, 105.2, 32.5, 29.1, 28.0; IR (film): 3046, 2929, 2867, 1737, 1596, 1507, 1239, 1147, 1007  $\text{cm}^{-1}$ ; HRMS-ESI ( $m/z$ ) [ $\text{M} + \text{H}$ ] $^+$  calcd for  $\text{C}_{17}\text{H}_{16}\text{OH}$ , 237.1279; found 237.1278.

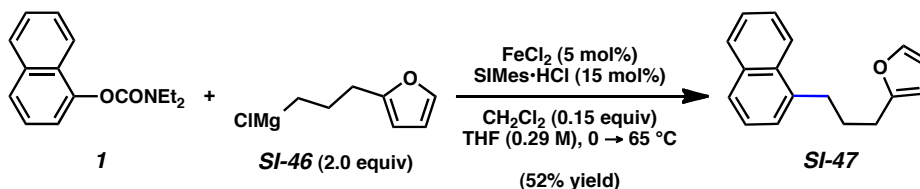

**SI-47 (Table 3, entry 3b).** Purification by flash chromatography (50:1:1 Hexanes:Benzene:EtOAc) supplied cross-coupled product **SI-47** (52% yield) as a yellow oil.  $R_f$  0.27 (50:1:1 Hexanes:Benzene:EtOAc). See spectral data above.

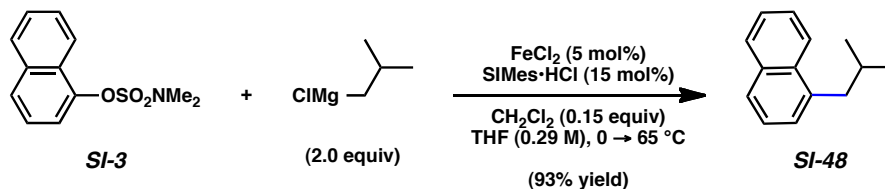

**SI-48 (Table 3, entry 4a).** Purification by flash chromatography (20:1 Pentanes:Benzene) yielded cross-coupled product **SI-48** (93% yield) as a clear oil.  $R_f$  0.73 (20:1 Pentanes:Benzene). Spectral data match those previously reported.<sup>12</sup>

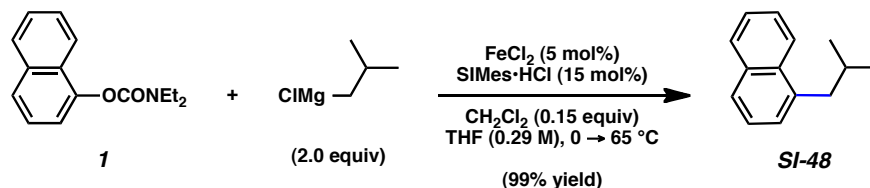

**SI-48 (Table 3, entry 4b).** Purification by flash chromatography (20:1 Pentanes:Benzenes) generated alkylated product **SI-48** (99% yield) as a clear oil.  $R_f$  0.73 (20:1 Pentanes:Benzenes). Spectral data match those previously reported.<sup>12</sup>

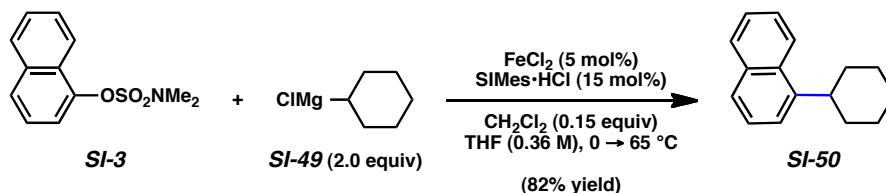

**SI-50 (Table 3, entry 5a).** Purification by flash chromatography (100% Pentanes) afforded cross-coupled product **SI-50** (82% yield) as a clear oil.  $R_f$  0.56 (100% Pentanes). Spectral data match those previously reported.<sup>13</sup>

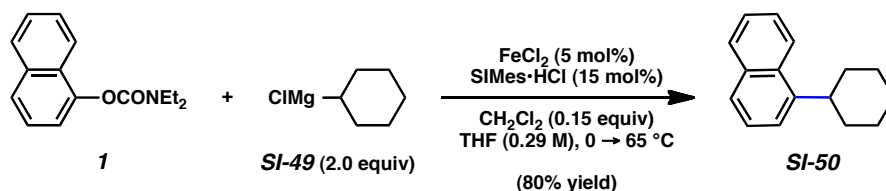

**SI-50 (Table 3, entry 5b).** Purification by flash chromatography (100% Pentanes) supplied cross-coupled product **SI-50** (80% yield) as a clear oil.  $R_f$  0.56 (100% Pentanes). Spectral data match those previously reported.<sup>13</sup>

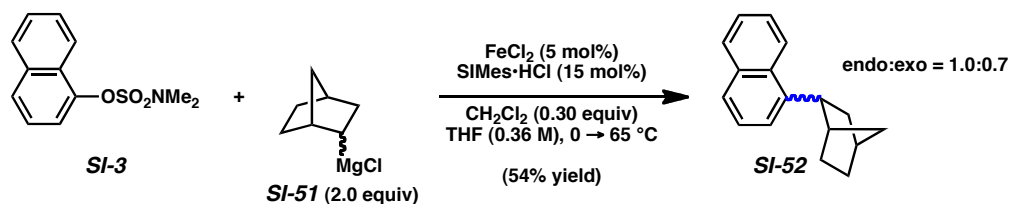

**SI-52 (Table 3, entry 6a).** Purification by flash chromatography (39:1 Pentanes:Benzenes) afforded cross-coupled products **SI-52** (54% yield as a 1.0:0.7 mixture of endo:exo isomers) as a clear oil.  $R_f$  0.47 (39:1 Pentanes:Benzenes).  $^1\text{H}$  NMR (500 MHz,  $\text{CDCl}_3$ ):  $\delta$  8.19 (d,  $J$  = 8.6, 1H), 7.88–7.85 (m, 1.5H), 7.73–7.72 (m, 1H), 7.67(d,  $J$  = 7.5, 0.6H), 7.54–7.40 (m, 6.3H), 4.06–4.03 (m, 1H), 3.41 (dd,  $J$  = 8.6, 5.6, 0.5H), 2.61–2.59 (m, 1.5H), 2.44–2.41 (m, 1.5H), 2.07–1.99 (m, 1.6H), 1.82–1.52 (m, 7.4H), 1.49–1.39 (m, 1.7H), 1.31 (d,  $J$  = 9.5, 1.6H), 1.27–1.16 (m, 1.9H);  $^{13}\text{C}$  NMR (125 MHz,  $\text{CDCl}_3$ ): (33 of 34 C)  $\delta$  143.2, 138.8, 134.2, 134.1, 133.1, 132.1, 128.9, 128.9, 126.6, 126.2, 125.7,

125.5, 125.4, 125.4, 125.2, 124.4, 124.1, 123.4, 121.8, 43.4, 42.4, 42.3, 41.7, 41.4, 39.7, 37.9, 37.2, 36.7, 34.1, 30.6, 29.9, 29.5, 23.6; IR (film): 3047, 2947, 2868, 1597, 1509, 1396  $\text{cm}^{-1}$ ; HRMS-EI ( $m/z$ ) [ $M$ ]<sup>+</sup> calcd for  $\text{C}_{17}\text{H}_{18}$ , 222.1409; found 222.1411.

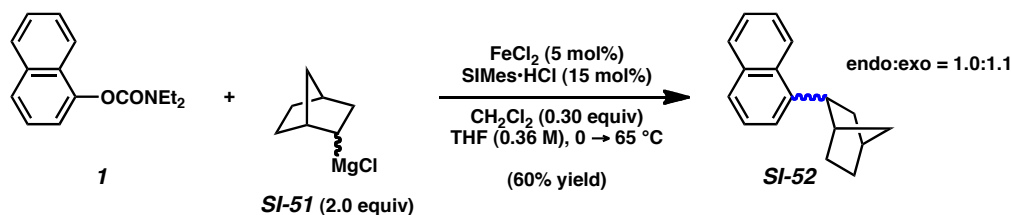

**SI-52** (Table 3, entry 6b). Purification by flash chromatography (39:1 Pentanes:Benzene) supplied cross-coupled products **SI-52** (60% yield, as a 1.0:1.1 mixture of endo:exo isomers) as a clear oil.  $R_f$  0.47 (39:1 Pentanes:Benzene). See above for spectral data.

### C. Synthesis of Grignard Reagents

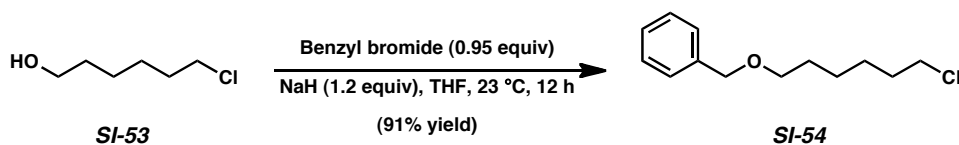

**SI-54**. A flame-dried round bottom flask was charged with NaH (1.43 g, 35.8 mmol, 1.2 equiv, 60% dispersion in mineral oil). The flask was cooled to 0  $^\circ\text{C}$ , and then a solution of 6-chloro-1-hexanol (**SI-53**) (4.0 mL, 29.9 mmol, 1 equiv) in THF (72.4 mL) was added dropwise via cannula. After 30 minutes, benzyl bromide (4.85 g, 3.4 mL, 28.4 mmol, 0.95 equiv) was added dropwise to the reaction vessel. The reaction was allowed to warm to 23  $^\circ\text{C}$  and stirred for 12 h. The reaction was quenched with a solution of 1 M NaOH (10 mL), and then EtOAc (150 mL) and 1 M aqueous solution of NaOH (50 mL) were added. The layers were separated, and the aqueous layer was extracted with EtOAc (2 x 150 mL). The organic layer was washed successively with  $\text{H}_2\text{O}$  (40 mL) and brine (40 mL). The combined organic layer was dried over  $\text{Na}_2\text{SO}_4$  and concentrated under reduced pressure. The crude residue was purified by flash chromatography (4:1 Hexanes:EtOAc) to yield chloro-benzyl ether **SI-54** as a yellow oil (5.85 g, 91% yield).  $R_f$  0.36 (4:1 Hexanes:EtOAc). Spectral data match those previously reported.<sup>14</sup>

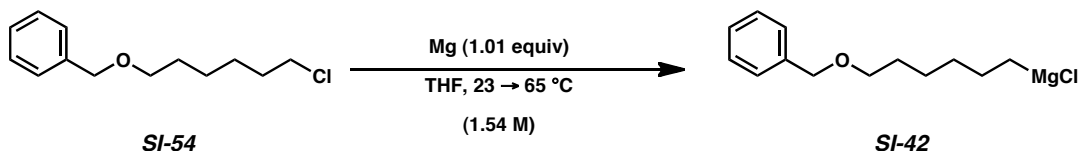

**SI-42**. A flame-dried round bottom flask was charged with magnesium powder (541.4 mg, 22.27 mmol, 1.01 equiv). The flask was fitted with a water-cooled condenser, and then flame-dried under vacuum to activate the magnesium powder. Dry THF (6.35 mL) was added and the suspension was heated to reflux for 1 h. To the refluxing suspension was added chloro-benzyl ether (**SI-54**) (5.0 g, 22.05 mmol, 1.0 equiv) dropwise over 30 minutes. Upon completion, dry THF (1.0 mL) was added,

and the reaction was held at reflux for 1 h. The reaction yielded alkyl benzyl magnesium chloride **SI-42**; the solution was found to be 1.54 M in THF.<sup>1</sup>

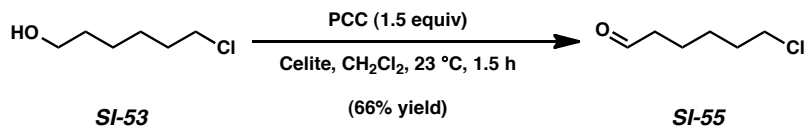

**SI-55.** A round bottom flask was charged with pyridinium chlorochromate (PCC) (14.47 g, 67.14 mmol, 1.5 equiv) and Celite (14.47 g). The material was suspended in  $\text{CH}_2\text{Cl}_2$  (120 mL) and then 6-chloro-1-hexanol (**SI-53**) (6.0 mL, 44.76 mmol, 1.0 equiv) was added dropwise over several minutes. The mixture was allowed to stir for 1.5 h at 23 °C. The reaction mixture was then filtered through a pad of basic alumina and Celite. The pad was washed with  $\text{Et}_2\text{O}$  (360 mL) and the volatiles were removed under reduced pressure. The crude residue was purified by flash chromatography (6:1 Pentanes: $\text{Et}_2\text{O}$ ) to yield 6-chloro-1-hexanal **SI-55** as a colorless oil (3.98 g, 66% yield).  $R_f$  0.31 (6:1 Pentanes: $\text{Et}_2\text{O}$ ). Spectral data match those previously reported.<sup>15</sup>

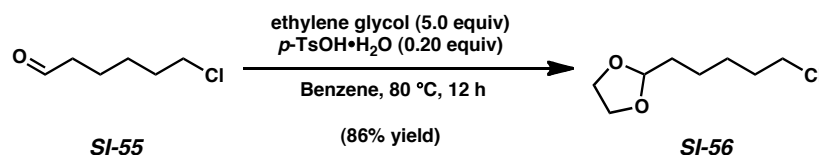

**SI-56.** To a solution of 6-chloro-1-hexanal (**SI-55**) (1.33g, 9.90 mmol, 1.0 equiv) and ethylene glycol (2.76 mL, 49.5 mmol, 5.0 equiv) in benzene (113 mL) was added *p*-toluenesulfonic acid monohydrate (*p*- $\text{TsOH}\cdot\text{H}_2\text{O}$ ) (376.6 mg, 1.98 mmol, 0.20 equiv). The resulting solution was heated to reflux. After 12 h, the reaction mixture was cooled to 23 °C, the volatiles were removed under reduced pressure, and the reaction mixture was diluted with  $\text{Et}_2\text{O}$  (50 mL), and then poured into water (25 mL). The layers were separated and the organic layer was washed sequentially with a solution of saturated aqueous  $\text{NaHCO}_3$  (25 mL) and brine (25 mL). The solution was dried over  $\text{MgSO}_4$  and evaporated to dryness. The crude residue was purified by flash chromatography (20:1 Hexanes: $\text{EtOAc}$ ) to yield 1-chlorohexanal ethylene acetal **SI-56** as a pale yellow oil (1.51 g, 86% yield).  $R_f$  0.28 (20:1 Hexanes: $\text{EtOAc}$ ), bp = 115 °C at 2.5 mmHg. Spectral data match those previously reported.<sup>16</sup>

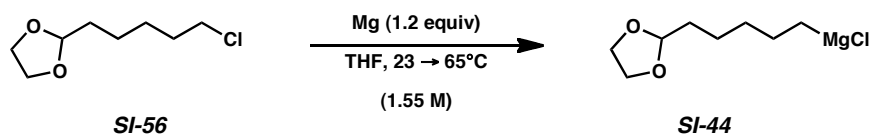

**SI-44.** A dry round bottom flask was charged with magnesium powder (635.2 mg, 26.13 mmol, 1.2 equiv). The flask was fitted with a water-cooled condenser and flame-dried under vacuum to activate the magnesium powder. To further activate the magnesium,  $\text{I}_2$  (single crystal) was added and the flask was heated under  $\text{N}_2$ . Dry THF (6.0 mL) was added and the suspension heated to reflux for 1 h. To the heated suspension were added 1,2-dibromoethane (0.1 mL) and 1-chlorohexanal ethylene acetal (**SI-56**) (3.89 g, 21.77 mmol, 1.0 equiv) dropwise. Next, dry THF (1.0 mL) was added, and the reaction was held at reflux for 1 h to afford the Grignard reagent **SI-44**; the solution was found to be 1.55 M in THF.<sup>1</sup>

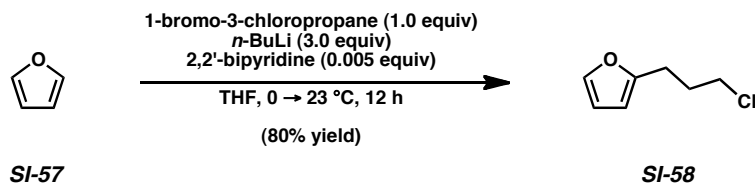

**SI-58.** A dry 2 L three-neck round bottom flask was fitted with two dry 250 mL pressure equalizing addition funnels. The flask was charged with 2,2'-bipyridine (270 mg, 1.74 mmol, 0.005 equiv) and dry THF (540 mL), and the solution was cooled to 0 °C. Furan (**SI-57**) (37.3 mL, 387.14 mmol, 3.7 equiv) was added in one portion via addition funnel, and the resulting solution was held at 0 °C for 30 minutes. A solution of *n*-BuLi (2.07 M in hexanes, 149 mL, 307.8 mmol, 3.0 equiv) was added to the addition funnel via cannula, and then added dropwise to the reaction flask. The mixture was allowed to stir at 0 °C in an ice bath for 2 h before 1-bromo-3-chloropropane (10.26 mL, 102.6 mmol, 1.0 equiv) was added dropwise. The reaction remained in the bath and was allowed to warm slowly 0 → 23 °C over 12 h. The reaction was quenched with a saturated, aqueous solution of NH<sub>4</sub>Cl (270 mL), and then hexanes (270 mL) were added. The layers were separated, and the aqueous layer was extracted with hexanes (350 mL x 3). The organic layer was washed with brine (275 mL x 2). The combined organic layers were dried over MgSO<sub>4</sub>, and concentrated under reduced pressure. The crude residue was purified by fractional vacuum distillation, 77–80 °C at 2 mmHg yielding 2-(3-chloropropyl)furan **SI-58** as a yellow oil (10.6 g, 80% yield). <sup>1</sup>H NMR (300 MHz, CDCl<sub>3</sub>): δ 7.31 (dd, *J* = 1.7, 0.6, 1H), 6.29 (dd, *J* = 3.0, 1.9, 1H), 6.04 (dd, *J* = 3.1, 0.7, 1H), 3.56 (t, *J* = 6.5, 2H), 2.81 (t, *J* = 7.2, 2H), 2.11 (quintet, *J* = 6.9, 2H); <sup>13</sup>C NMR (150 MHz, CDCl<sub>3</sub>): δ 154.5, 141.4, 110.3, 105.8, 44.3, 31.0, 25.3; IR (film): 2959, 1597, 1507, 1443, 1294, 1148, 1007 cm<sup>-1</sup>; HRMS-ESI (*m/z*) [M + Na]<sup>+</sup> calcd for C<sub>7</sub>H<sub>9</sub>ClONa, 167.0153; found 167.0156.

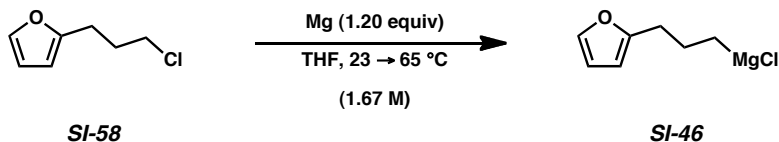

**SI-46.** A dry round bottom flask was charged with magnesium powder (1.01g, 41.50 mmol, 1.2 equiv). The flask was fitted with a water-cooled condenser and flame-dried under vacuum to activate the magnesium powder. Dry THF (10.5 mL) was added and the resulting suspension was heated to reflux for 1 h. To the refluxing suspension was added 2-(3-chloropropyl)furan (**SI-58**) (5.0 g, 34.58 mmol, 1.0 equiv) dropwise over 45 minutes. Next dry THF (1.0 mL) was added, and the reaction was held at reflux for 1 h. The reaction yielded (3-(furan-2-yl)propyl)magnesium chloride **SI-46**; the solution was found to be 1.67 M in THF.<sup>1</sup>

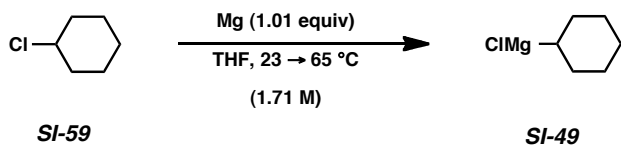

**SI-49.** A dry round bottom flask was charged with magnesium powder (1.03 g, 42.58 mmol, 1.01 equiv). The flask was fitted with a water-cooled condenser and flame-dried under vacuum to activate

the magnesium powder. Dry THF (13.1 mL) was added and the suspension was heated to reflux for 1 h. To the heated suspension was added chlorocyclohexane (**SI-59**) (5.0 g, 42.16 mmol, 1.0 equiv) dropwise over 20 minutes. Next, dry THF (1.0 mL) was added, and the reaction was held at reflux for 1 h. The reaction yielded cyclohexylmagnesium chloride **SI-49**; the solution was found to be 1.71 M in THF.<sup>17,1</sup>

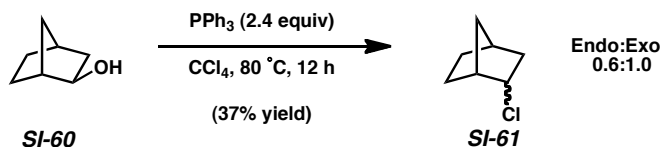

**SI-61.** In a flame-dried round bottom flask, *exo*-norborneol (**SI-60**) (5.0 g, 44.57 mmol, 1 equiv) and triphenylphosphine (28.1 g, 106.97 mmol, 2.4 equiv) were dissolved in dry  $\text{CCl}_4$  (127.3 mL). The reaction was allowed to stir for 12 h at 80 °C, and was then cooled to 23 °C. The reaction was diluted with pentanes (100 mL), filtered through a pad of silica with additional pentanes (400 mL), and then concentrated under reduced pressure. The crude residue was purified by fractional distillation at 25 mbar, 50 °C to yield 2-chloronorborneol **SI-61** as a white solid (2.2 g, 37% yield).  $^1\text{H}$  NMR (600 MHz,  $\text{CDCl}_3$ ):  $\delta$  4.26–4.22 (m, 0.6H), 3.89 (dt,  $J = 7.3, 2.0$ , 1H), 2.42–4.21 (m, 1.6H), 2.34–2.31 (m, 1H), 2.23 (t,  $J = 4.3$ , 0.6H), 2.20–2.15 (m, 0.6H), 2.04–2.00 (m, 0.6H), 1.94 (dd,  $J = 7.4, 2.3$ , 0.6H), 1.91, (dd,  $J = 7.4, 2.2$ , 0.6H), 1.83–1.76 (m, 2H), 1.65–1.56 (m, 1.6H), 1.49–1.37 (m, 2.9H), 1.35–1.31 (m, 0.7H), 1.26–1.22 (m, 2H), 1.19 (d,  $J = 1.3$ , 1H), 1.16–1.12 (m, 1H), 1.10–1.06 (m, 1H), 1.00 (s, 1H);  $^{13}\text{C}$  NMR (75 MHz,  $\text{CDCl}_3$ ):  $\delta$  62.7, 46.2, 43.7, 36.7, 35.2, 28.3, 26.9. Spectral data match those previously reported.<sup>18</sup>

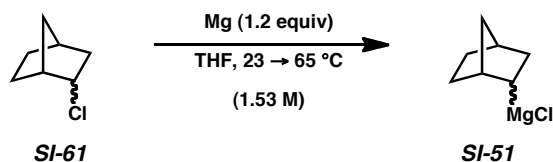

**SI-51.** A dry round bottom flask was charged with magnesium powder (1.02 g, 41.80 mmol, 1.2 equiv). The flask was fitted with a water-cooled condenser and flame-dried under vacuum to activate the magnesium powder. To further activate the magnesium,  $\text{I}_2$  (single crystal) was added and the flask gently heated with a heat gun under  $\text{N}_2$ . Dry THF (6.1 mL) was added, the suspension was heated to reflux for 1 h. To the refluxing suspension were added 1,2-dibromoethane (0.5 mL) and 2-chloronorborneol (**SI-61**) (4.55 g, 34.83 mmol, 1.0 equiv) dropwise. Next, dry THF (1.0 mL) was added, and the reaction was held at reflux for 1 h. The reaction yielded 2-norbornylmagnesium chloride **SI-51**; the solution was found to be 1.53 M in THF.<sup>19,1</sup>

#### D. Synthetic Application (Figure 3)

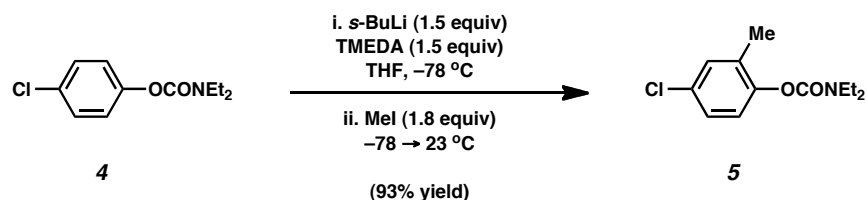



5. To a solution of known carbamate **4**<sup>20</sup> (0.569 g, 2.50 mmol, 1.0 equiv) and TMEDA (0.56 mL, 3.75 mmol, 1.5 equiv) in THF (27.8 mL) at  $-78\text{ }^{\circ}\text{C}$  was added *s*-BuLi (3.5 mL, 1.07 mmol, 1.5 equiv) over 15 min. After stirring for 60 min, MeI (0.28 mL, 4.50 mmol, 1.8 equiv) was added over 5 min. The reaction was allowed to stir at  $-78\text{ }^{\circ}\text{C}$  for 1 h, then warmed to  $23\text{ }^{\circ}\text{C}$  over 1 h, and then quenched with saturated aqueous  $\text{NH}_4\text{Cl}$  (20 mL). The layers were separated, and the aqueous layer was extracted with  $\text{Et}_2\text{O}$  (3 x 30 mL). The combined organic layers were washed with brine (30 mL), dried over  $\text{MgSO}_4$  and concentrated under reduced pressure, yielding methylated product **5** (0.5606 g, 93% yield) as a light yellow oil. The crude residue was used without further purification.  $R_f$  0.48 (3:1 Hexanes: $\text{Et}_2\text{O}$ ). Spectral data match those previously reported.<sup>21</sup>

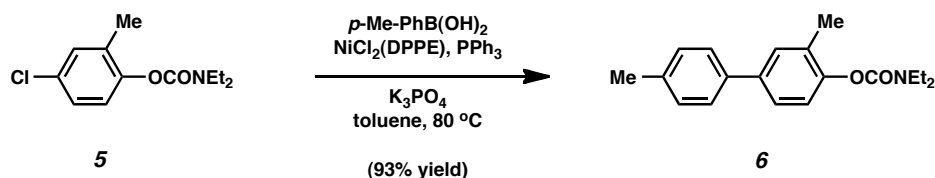

6. A dry 20 mL vial was charged with  $\text{K}_3\text{PO}_4$  (1.15 g, 5.4 mmol, 4.5 equiv),  $\text{Ni}(\text{DPPE})\text{Cl}_2$  (31.7 mg, 0.06 mmol, 5 mol%), triphenylphosphine (31.5 mg, 0.12 mmol, 10 mol%), *p*-Me-PhB(OH)<sub>2</sub> (489.5 mg, 3.6 mmol, 3.0 equiv), and aryl chloride **5** (290.1 mg, 1.2 mmol, 1.0 equiv). The headspace was evacuated and backfilled with  $\text{N}_2$  (3 times). Toluene (6.0 mL) was added, and the resulting mixture was heated to  $80\text{ }^{\circ}\text{C}$  for 14 h. The reaction was then cooled to  $23\text{ }^{\circ}\text{C}$  and purified by flash chromatography (3:1 Hexanes: $\text{Et}_2\text{O}$ ) to produce carbamate **6** (331.5 mg, 93% yield) as a colorless solid.  $R_f$  0.67 (3:1 Hexanes: $\text{Et}_2\text{O}$ ). mp:  $53.0\text{--}56.3\text{ }^{\circ}\text{C}$ .  $^1\text{H}$  NMR (500 MHz,  $\text{CDCl}_3$ ):  $\delta$  7.45 (d,  $J = 8.1$ , 2H), 7.41 (d,  $J = 1.8$ , 1H), 7.38 (dd,  $J = 8.3$ , 2.1, 1H), 7.23 (d,  $J = 7.8$ , 2H), 7.12 (d,  $J = 8.2$ , 1H), 3.49 (q,  $J = 7.0$ , 2H), 3.42 (q,  $J = 6.9$ , 2H), 2.39 (s, 3H), 2.28 (s, 3H), 1.31–1.26 (m, 3H), 1.26–1.21 (m, 3H);  $^{13}\text{C}$  NMR (125 MHz,  $\text{CDCl}_3$ )  $\delta$  154.1, 149.5, 138.5, 138.1, 136.9, 130.7, 129.7, 129.5, 127.1, 125.5, 122.6, 42.4, 42.0, 21.2, 16.6, 14.4, 13.6; IR (film): 2977, 2932, 1712, 1420, 1273, 1273, 1210, 1210, 1158  $\text{cm}^{-1}$ ; HRMS-ESI ( $m/z$ ) [ $\text{M} + \text{H}$ ]<sup>+</sup> calcd for  $\text{C}_{19}\text{H}_{23}\text{NO}_2\text{H}$ , 298.1807; found 298.1806.

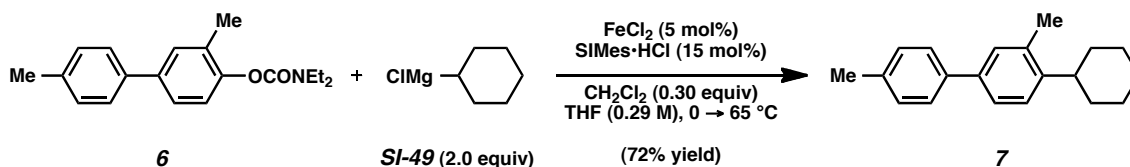

7. Compound **7** (119.0 mg, 0.4 mmol) was prepared using the representative procedure described on page S2. Purification by flash chromatography (100% Pentanes) afforded cross-coupled product **7** (76.5 mg, 72% yield) as a colorless oil.  $R_f$  0.42 (100% Pentanes).  $^1\text{H}$  NMR (500 MHz,  $\text{CDCl}_3$ ):  $\delta$  7.49 (dt,  $J = 8.1$ , 1.6, 2H), 7.39 (dd,  $J = 8.0$ , 1.9, 1H), 7.37 (d,  $J = 1.7$ , 1H), 7.28 (d,  $J = 8.0$ , 1H), 7.23 (d,  $J = 7.9$ , 2H), 2.78–2.71 (m, 1H), 2.40 (s, 3H), 2.39 (s, 3H), 1.93–1.76 (m, 5H), 1.48–1.42 (m, 4H);  $^{13}\text{C}$  NMR (125 MHz,  $\text{CDCl}_3$ ):  $\delta$  144.9, 138.5, 138.4, 136.7, 135.6, 129.5, 128.9, 127.0, 126.0, 124.8, 40.1, 33.9, 27.3, 26.5, 21.2, 19.7; IR (film): 3020, 2922, 2850, 1495, 1448, 809  $\text{cm}^{-1}$ . HRMS-ESI ( $m/z$ ) [ $\text{M} + \text{NH}_4$ ]<sup>+</sup> calcd for  $\text{C}_{20}\text{H}_{24}\text{NH}_4$ , 282.2222; found 282.2220.

## E. Key Optimization Studies

Table SI-1. Selected results from optimization studies

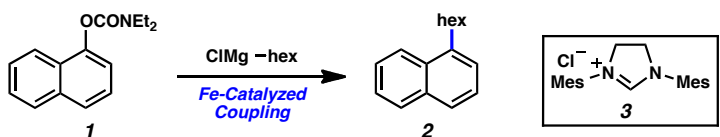

| entry | iron salt                       | solvent | ligands/additives                                               | temp (time)        | yield <sup>a</sup> | conditions                  |
|-------|---------------------------------|---------|-----------------------------------------------------------------|--------------------|--------------------|-----------------------------|
| 1     | Fe(acac) <sub>3</sub> (10 mol%) | THF     | TMEDA (2 equiv)                                                 | -20 °C (1.5 h)     | <5%                | Skrydstrup's conditions     |
| 2     | Fe(acac) <sub>3</sub> (10 mol%) | THF     | NMP (5.8 equiv)                                                 | 23 °C (1.5 h)      | 58%                | Fürstner's conditions       |
| 3     | FeCl <sub>2</sub> (0.5 mol%)    | THF     | <b>3</b> (4 mol%)                                               | 25 °C (2 h)        | 29%                | Shi's conditions            |
| 4     | FeCl <sub>2</sub> (5 mol%)      | THF     | <b>3</b> (15 mol%)                                              | 0 → 65 °C (3 h)    | 50–85%             | Shi's conditions, with heat |
| 5     | FeCl <sub>2</sub> (5 mol%)      | THF     | <b>3</b> (15 mol%)<br>CH <sub>2</sub> Cl <sub>2</sub> (15 mol%) | 0 → 65 °C (10 min) | 93%                | Optimal conditions          |

<sup>a</sup> The yield was determined by <sup>1</sup>H NMR analysis with hexamethylbenzene as internal standard.

Table SI-2. Iron Precatalysts

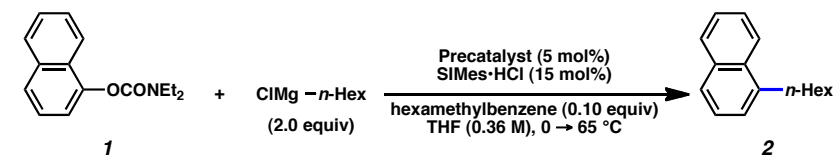

| entry | Precatalyst           | yield (mol %) <sup>a</sup> |
|-------|-----------------------|----------------------------|
| 1     | Fe(acac) <sub>3</sub> | 84                         |
| 2     | FeCl <sub>3</sub>     | 75                         |
| 3     | FeCl <sub>2</sub>     | 86                         |

<sup>a</sup> The yield was determined by <sup>1</sup>H NMR analysis with hexamethylbenzene as internal standard.

Table SI-3. Influence of Solvents

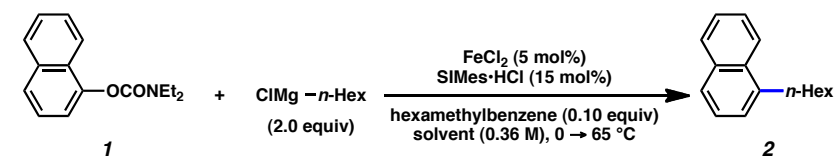

| entry          | solvent                         | yield (mol %) <sup>a</sup> |
|----------------|---------------------------------|----------------------------|
| 1 <sup>b</sup> | Et <sub>2</sub> O               | 85                         |
| 2              | dimethoxyethane                 | 84                         |
| 3              | dioxane                         | 71                         |
| 4              | toluene                         | 31                         |
| 5 <sup>b</sup> | CH <sub>2</sub> Cl <sub>2</sub> | 0                          |

<sup>a</sup> The yield was determined by <sup>1</sup>H NMR analysis with hexamethylbenzene as internal standard.

<sup>b</sup> Reaction heated to 35 °C.

**Table SI-4. Influence of chlorinated additives**
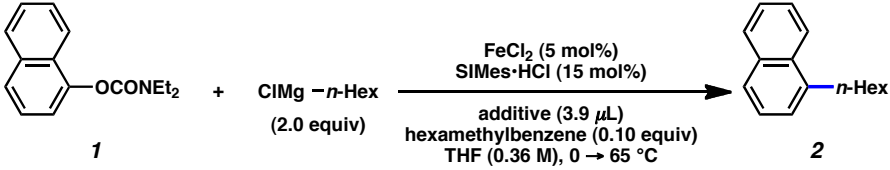

| entry          | additive                        | yield (mol %) <sup>a</sup> |
|----------------|---------------------------------|----------------------------|
| 1              | No additive                     | 50–85                      |
| 2              | CH <sub>2</sub> Cl <sub>2</sub> | 95                         |
| 3              | CH <sub>2</sub> Br <sub>2</sub> | 85                         |
| 4              | CHCl <sub>3</sub>               | 82                         |
| 5              | 1,2-dichloroethane              | 82                         |
| 6 <sup>b</sup> | 1,1-dichloroethane              | 90                         |
| 7              | CCl <sub>4</sub>                | 94                         |

<sup>a</sup> The yield was determined by <sup>1</sup>H NMR analysis with hexamethylbenzene as internal standard.

<sup>b</sup> 1,1-dichloroethane (4.9 μL, 0.15 equiv).

**Table SI-5. Influence of Solvent Choice with CH<sub>2</sub>Cl<sub>2</sub> additive present**
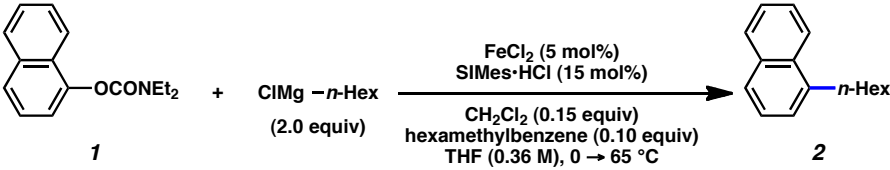

| entry | solvent           | yield (mol %) <sup>a</sup> |
|-------|-------------------|----------------------------|
| 1     | Et <sub>2</sub> O | 86                         |
| 2     | dimethoxyethane   | 77                         |
| 3     | dioxane           | 71                         |
| 4     | toluene           | 62                         |

<sup>a</sup> The yield was determined by <sup>1</sup>H NMR analysis with hexamethylbenzene as internal standard.

## F. Trace Metal Impurities<sup>a</sup>

| entry | Vender (Fe %)                                  | Cu (ppm) | Ni (ppm) | Pd (ppm) | Combined% (w/w) |
|-------|------------------------------------------------|----------|----------|----------|-----------------|
| 1     | FeCl <sub>2</sub> (Lot # A4048080) Strem (98%) | 111      | 131      | 298      | 0.05            |
| 2     | FeCl <sub>2</sub> (Lot # A5268039) Strem (98%) | 324      | 82       | 56       | 0.05            |
| 3     | FeCl <sub>2</sub> Aldrich (99.998%)            | 44       | 10       | 18       | 0.01            |
| 4     | THF                                            | 0        | 0        | 0        | 0               |
| 5     | Dichloromethane                                | 2        | 0        | 1        | 0               |

<sup>a</sup> All measurements were taken using ICP-OES.

Table SI-6. Metal Catalyst.

| entry | Metal                                                                      | yield (mol %) <sup>a</sup> |
|-------|----------------------------------------------------------------------------|----------------------------|
| 1     | FeCl <sub>2</sub>                                                          | 95                         |
| 2     | NiCl <sub>2</sub>                                                          | 4                          |
| 3     | Ni(acac) <sub>2</sub>                                                      | 3                          |
| 4     | Ni(cod) <sub>2</sub>                                                       | 3                          |
| 5     | PdCl <sub>2</sub>                                                          | 3                          |
| 6     | Pd <sub>2</sub> (dba) <sub>3</sub>                                         | 6                          |
| 7     | CuCl                                                                       | 0                          |
| 8     | CuCl <sub>2</sub>                                                          | 10                         |
| 9     | NiCl <sub>2</sub> (2.5%)<br>+ PdCl <sub>2</sub> (2.5%)                     | 3                          |
| 10    | Ni(cod) <sub>2</sub> (2.5%)<br>+ Pd <sub>2</sub> (dba) <sub>3</sub> (2.5%) | 11                         |

<sup>a</sup> The yield was determined by <sup>1</sup>H NMR analysis with hexamethylbenzene as internal standard.

Table SI-7. Iron with Various Metal Additives.

| entry | Metal additive                     | yield (mol %) <sup>a</sup> |
|-------|------------------------------------|----------------------------|
| 1     | None                               | 95                         |
| 2     | NiCl <sub>2</sub>                  | 81                         |
| 3     | Ni(acac) <sub>2</sub>              | 78                         |
| 4     | Ni(cod) <sub>2</sub>               | 75                         |
| 5     | PdCl <sub>2</sub>                  | 85                         |
| 6     | Pd <sub>2</sub> (dba) <sub>3</sub> | 56                         |
| 7     | CuCl                               | 87                         |
| 8     | CuCl <sub>2</sub>                  | 92                         |

<sup>a</sup> The yield was determined by <sup>1</sup>H NMR analysis with hexamethylbenzene as internal standard.

**$^1\text{H}$  and  $^{13}\text{C}$**   
**NMR Spectra**

Current Data Parameters  
 NAME rfn-1-236(proton)  
 EXPNO 1  
 PROCNO 1

F2 - Acquisition Parameters  
 Date\_ 20120109  
 Time 16:50  
 INSTRUM dirx500  
 PROBHD 5 mm bb-Z Z800  
 PULPROG zg30  
 TD 65536  
 SOLVENT CDCI3  
 NS 8  
 DS 0  
 SWH 10000.000 Hz  
 FIDRES 0.152588 Hz  
 AQ 3.2769001 sec  
 RG 128  
 DW 50.000 usec  
 DE 6.00 usec  
 TE 296.8 K  
 D1 2.00000000 sec  
 TD0 1

===== CHANNEL f1 =====  
 NUC1 1H  
 P1 12.25 usec  
 PL1 0.00 dB  
 SFO1 500.330020 MHz

F2 - Processing parameters  
 SI 32768  
 SF 500.3300220 MHz  
 WDW EM  
 SSB 0  
 LB 0.30 Hz  
 GB 0  
 PC 1.00

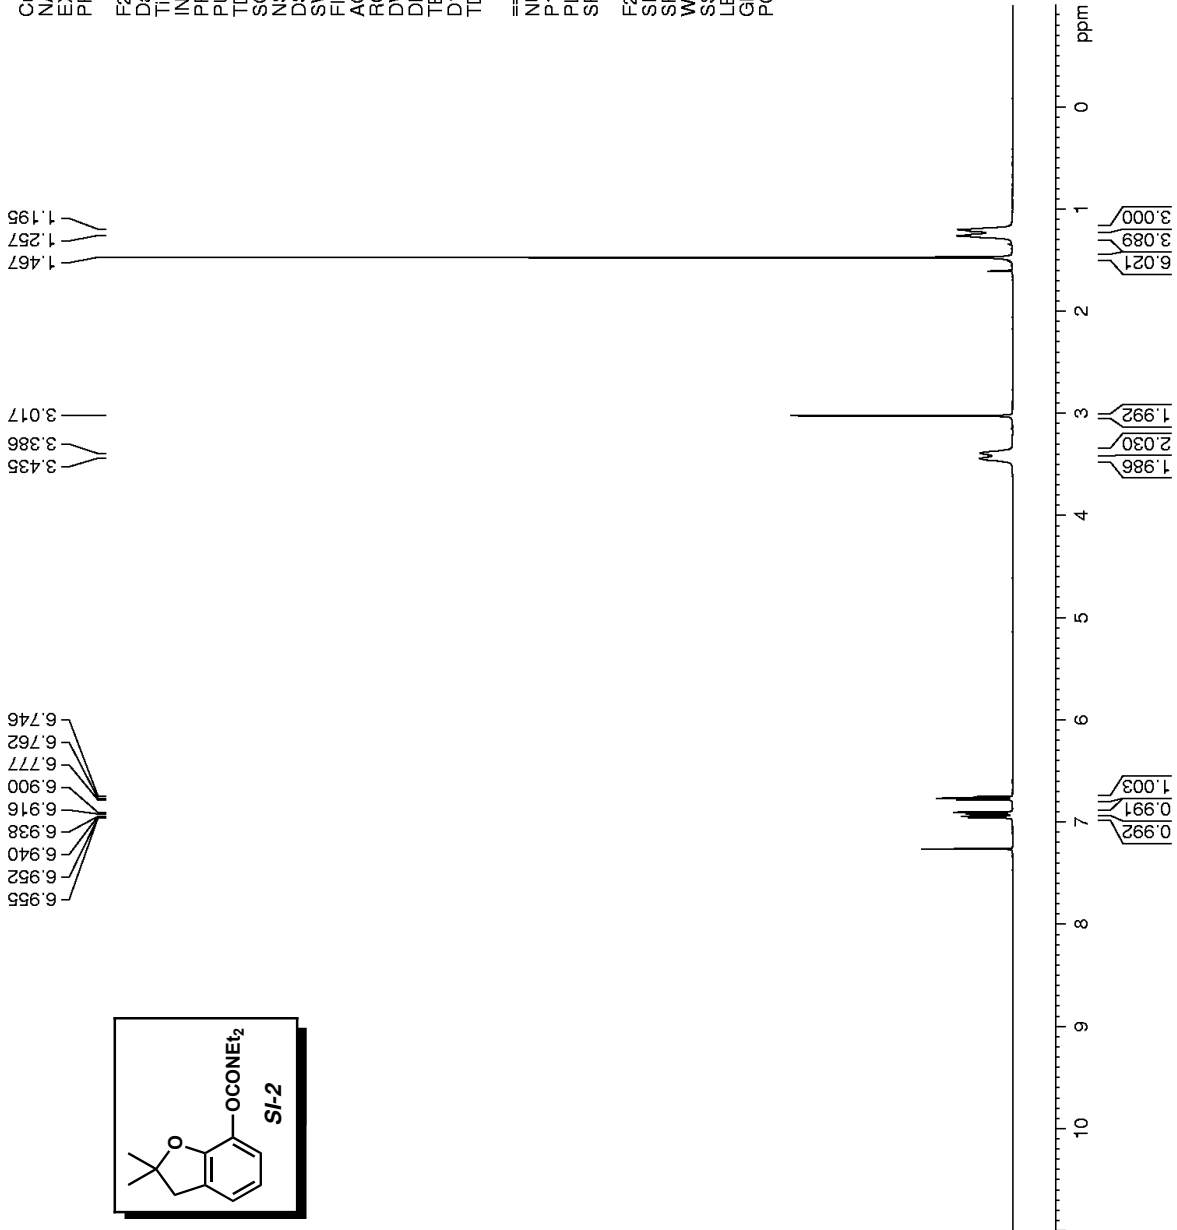

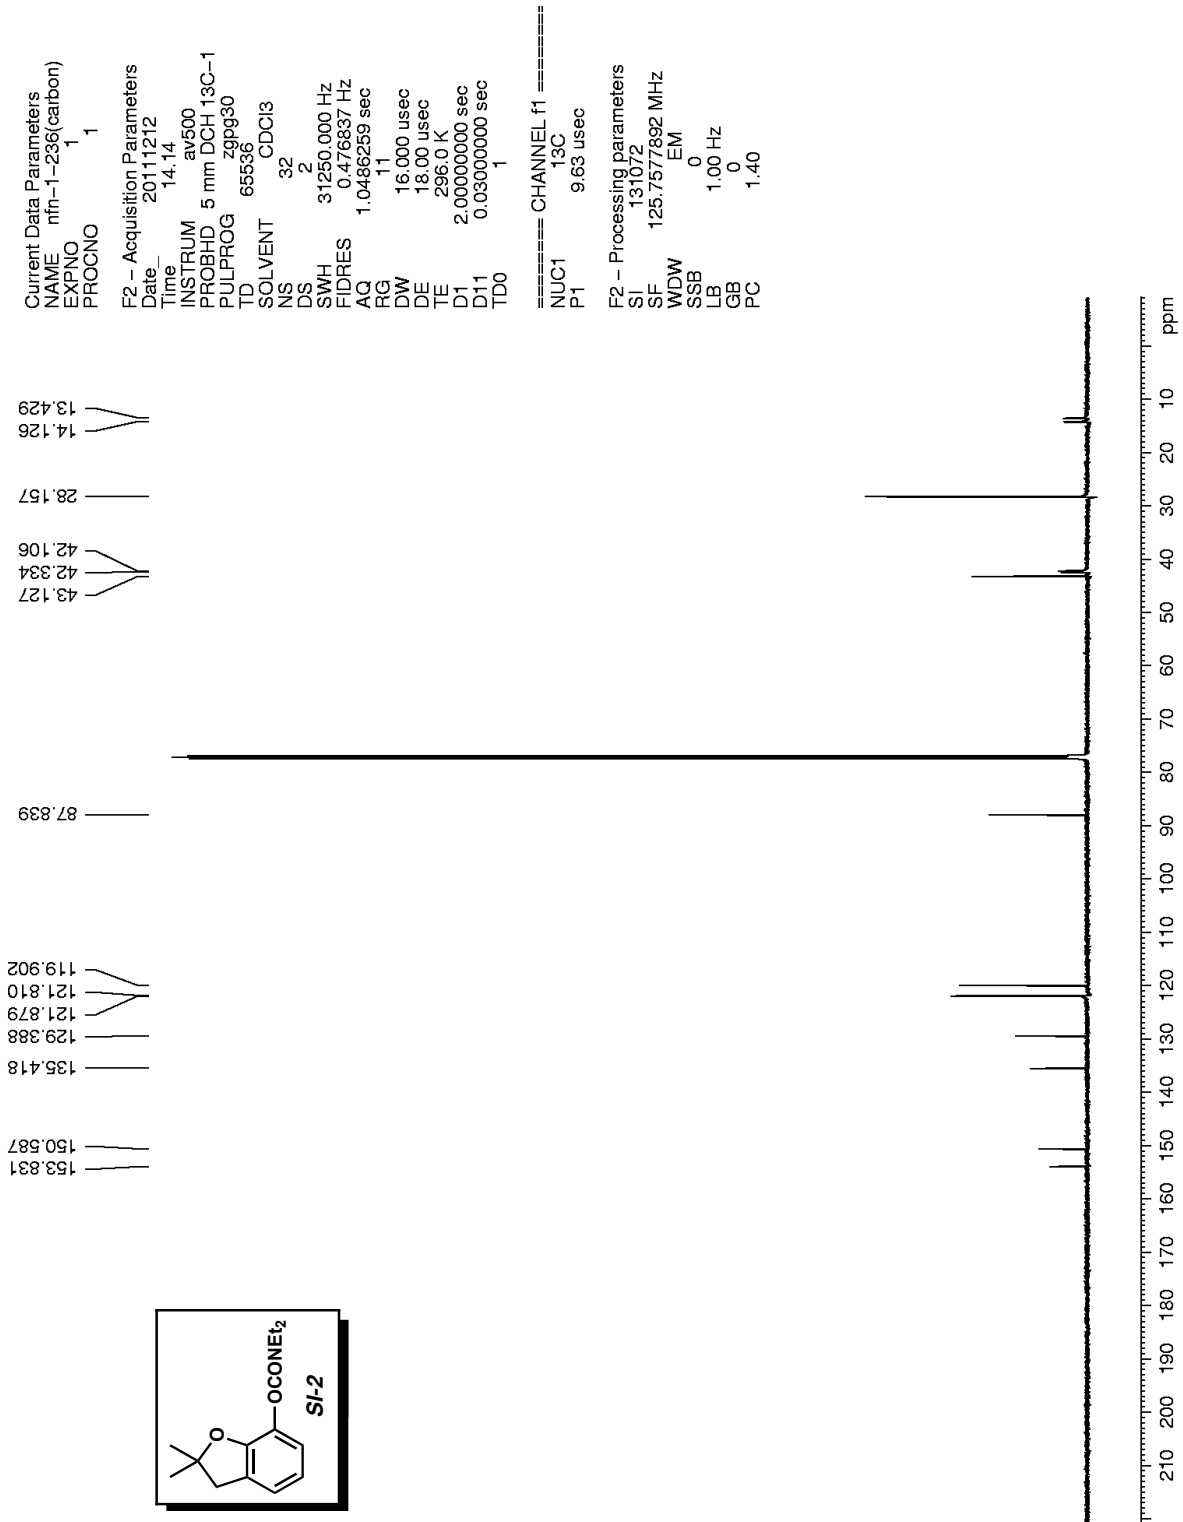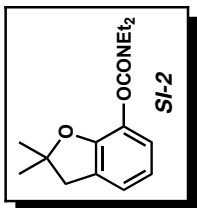

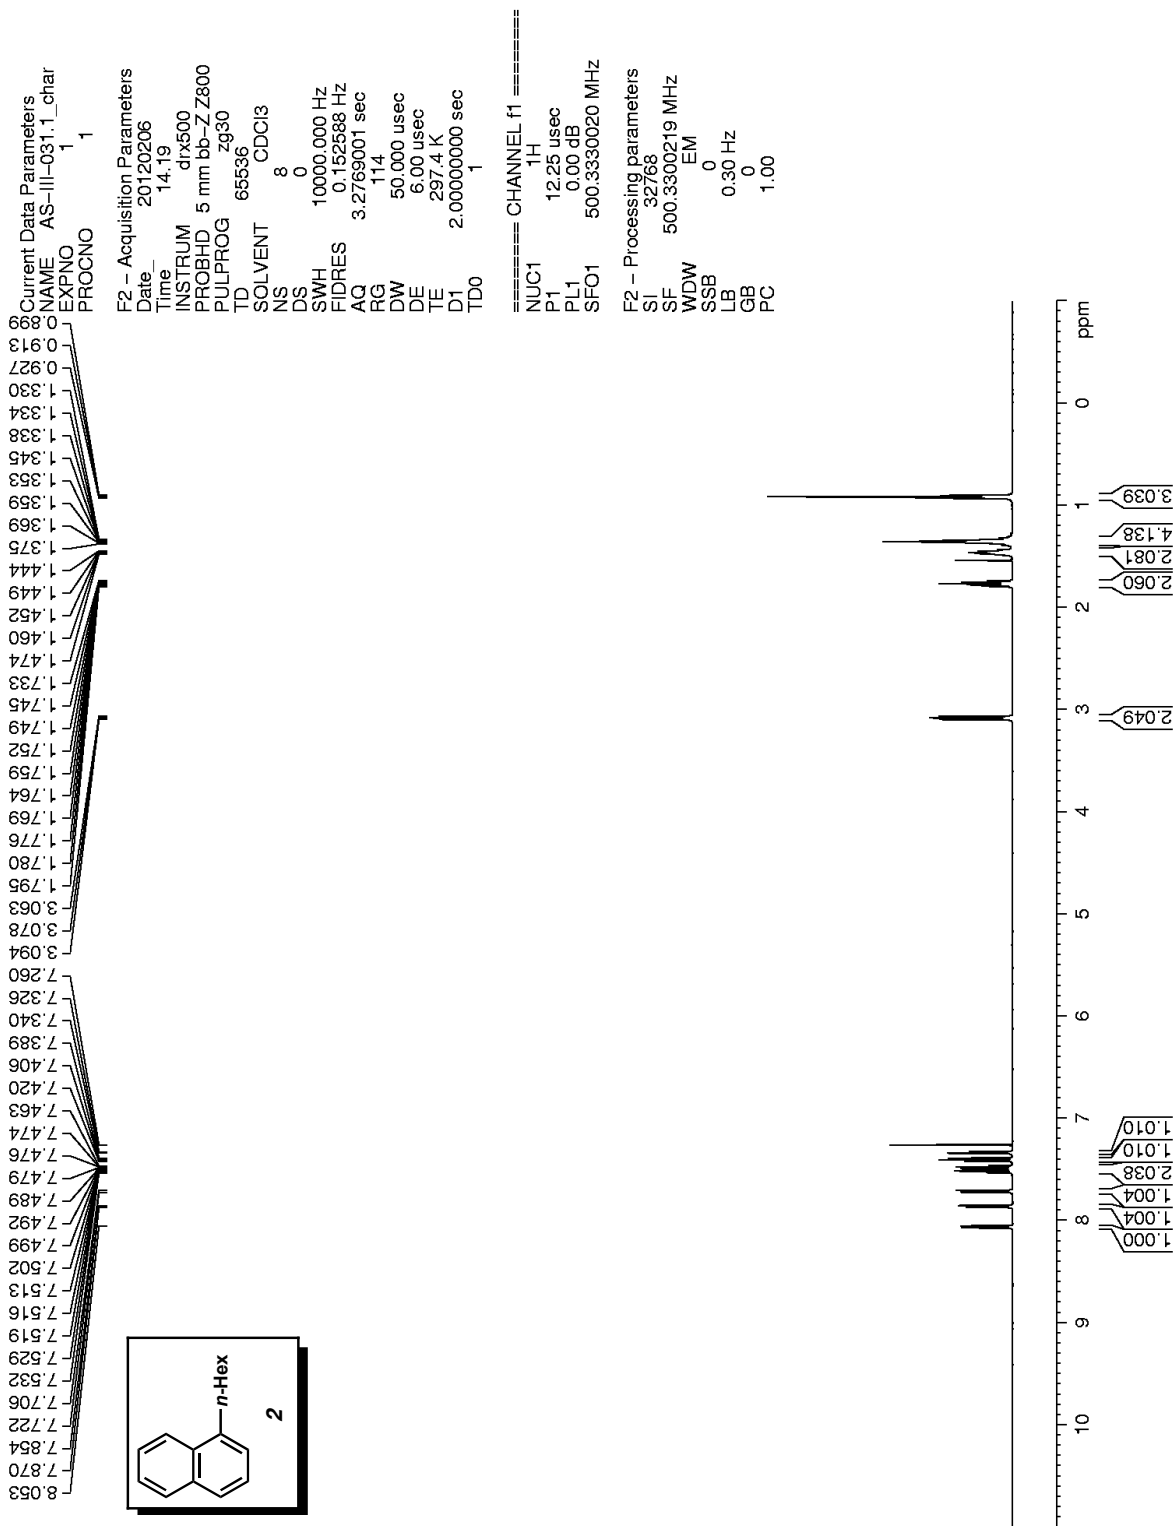



Current Data Parameters  
 NAME AS-11-265\_C  
 EXPNO 1  
 PROCNO 1

F2 - Acquisition Parameters  
 Date\_ 20110816  
 Time 17.06  
 INSTRUM avance500  
 PROBHD 5 mm bb-Z Z800  
 PULPROG zg30  
 TD 65536  
 SOLVENT CDCI3  
 NS 16  
 DS 0  
 SWH 10000.000 Hz  
 FIDRES 0.152588 Hz  
 AQ 3.2769001 sec  
 RG 181  
 DW 50.000 usec  
 DE 6.00 usec  
 TE 296.2 K  
 D1 2.00000000 sec  
 MCREST 0.00000000 sec  
 MCWRK 0.01500000 sec

===== CHANNEL f1 =====  
 NUC1 1H  
 P1 12.25 usec  
 PL1 0.00 dB  
 SFO1 500.3330020 MHz

F2 - Processing parameters  
 SI 32768  
 SF 500.3300225 MHz  
 WDW EM  
 SSB 0  
 LB 0.30 Hz  
 GB 0  
 PC 1.00

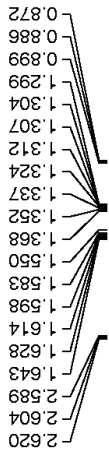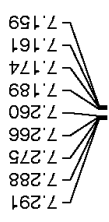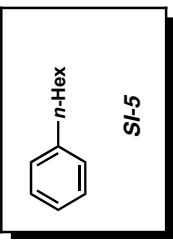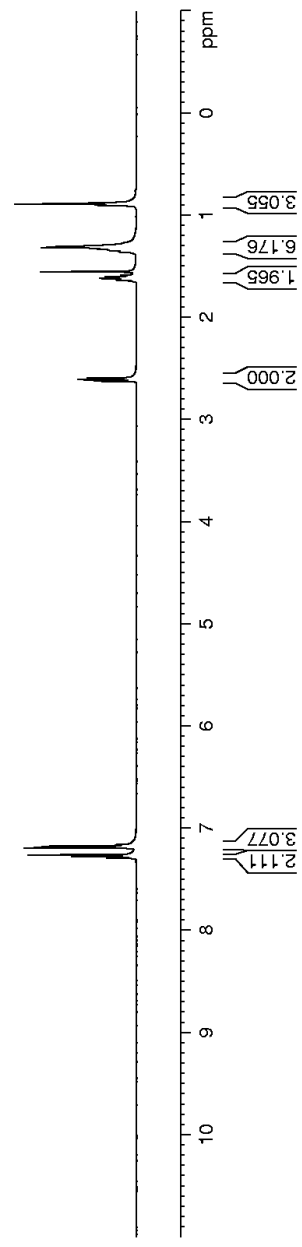

Current Data Parameters  
 NAME AS-III-216.2\_char  
 EXPNO 1  
 PROCNO 1

F2 - Acquisition Parameters  
 Date\_ 20120207  
 Time 20:41  
 INSTRUM dirx500  
 PROBHD 5 mm bb-Z Z800  
 PULPROG zg30  
 TD 65536  
 SOLVENT CDCI3  
 NS 8  
 DS 0  
 SWH 10000.000 Hz  
 FIDRES 0.152588 Hz  
 AQ 3.2769001 sec  
 RG 101.6  
 DW 50.000 usec  
 DE 6.00 usec  
 TE 297.6 K  
 D1 2.00000000 sec  
 TD0 1

===== CHANNEL f1 =====  
 NUC1 1H  
 P1 12.25 usec  
 PL1 0.00 dB  
 SFO1 500.3330020 MHz

F2 - Processing parameters  
 SI 32768  
 SF 500.3300219 MHz  
 WDW EM  
 SSB 0  
 LB 0.30 Hz  
 GB 0  
 PC 1.00

2.676  
2.661  
2.645  
1.656  
1.640  
1.626  
1.611  
1.595  
1.541  
1.353  
1.343  
1.337  
1.334  
1.324  
1.316  
1.308  
1.304  
0.905  
0.892  
0.878

7.535  
7.519  
7.290  
7.274  
7.260

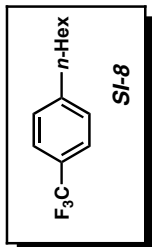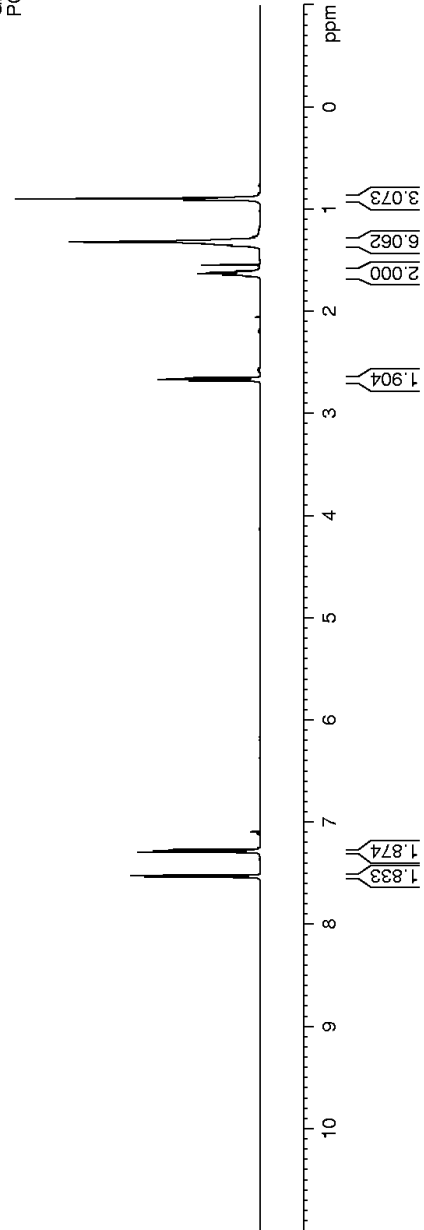

Current Data Parameters  
 NAME AS-III-095  
 EXPNO 1  
 PROCNO 1

F2 - Acquisition Parameters  
 Date\_ 20111009  
 Time 10:22  
 INSTRUM avance500  
 PROBHD 5 mm bb-Z Z800  
 PULPROG zg30  
 TD 65536  
 SOLVENT C6D6  
 NS 16  
 DS 0  
 SWH 10000.000 Hz  
 FIDRES 0.152588 Hz  
 AQ 3.2769001 sec  
 RG 128  
 DW 50.000 usec  
 DE 6.00 usec  
 TE 295.0 K  
 D1 2.00000000 sec  
 MCREST 0.00000000 sec  
 MCWRK 0.01500000 sec

===== CHANNEL f1 =====  
 NUC1 1H  
 P1 12.25 usec  
 PL1 0.00 dB  
 SFO1 500.3330020 MHz

F2 - Processing parameters  
 SI 32768  
 SF 500.3300109 MHz  
 WDW EM  
 SSB 0  
 LB 0.30 Hz  
 GB 0  
 PC 1.00

3.351  
2.509  
2.494  
2.479  
1.575  
1.559  
1.546  
1.531  
1.516  
1.282  
1.278  
1.265  
1.254  
1.245  
1.225  
0.894  
0.881  
0.867

7.160  
7.038  
7.021  
6.837  
6.820

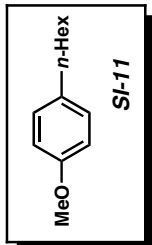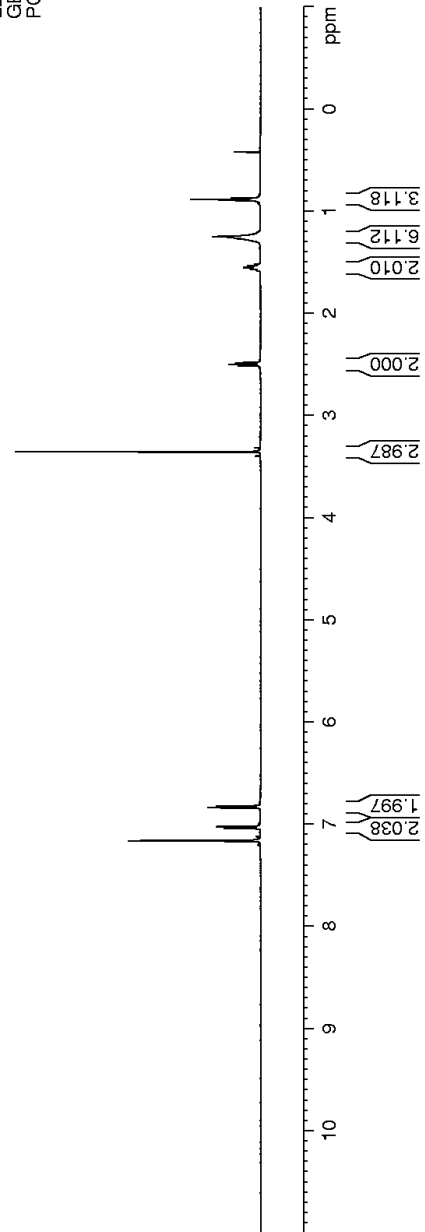

Current Data Parameters  
 NAME AS-II-300\_char  
 EXPNO 3  
 PROCNO 1

F2 - Acquisition Parameters  
 Date\_ 20120208  
 Time 16:42  
 INSTRUM av500  
 PROBHD 5 mm DCH 13C-1  
 PULPROG zg30  
 TD 65536  
 SOLVENT C6D6  
 NS 3  
 DS 0  
 SWH 10000.000 Hz  
 FIDRES 0.152588 Hz  
 AQ 3.2768500 sec  
 RG 11  
 DW 50.000 usec  
 DE 10.00 usec  
 TE 296.0 K  
 D1 2.00000000 sec  
 TD0 1

==== CHANNEL f1 =====  
 NUC1 1H  
 P1 10.00 usec

F2 - Processing parameters  
 SI 65536  
 SF 500.129974 MHz  
 WDW EM  
 SSB 0  
 LB 0.30 Hz  
 GB 0  
 PC 1.00

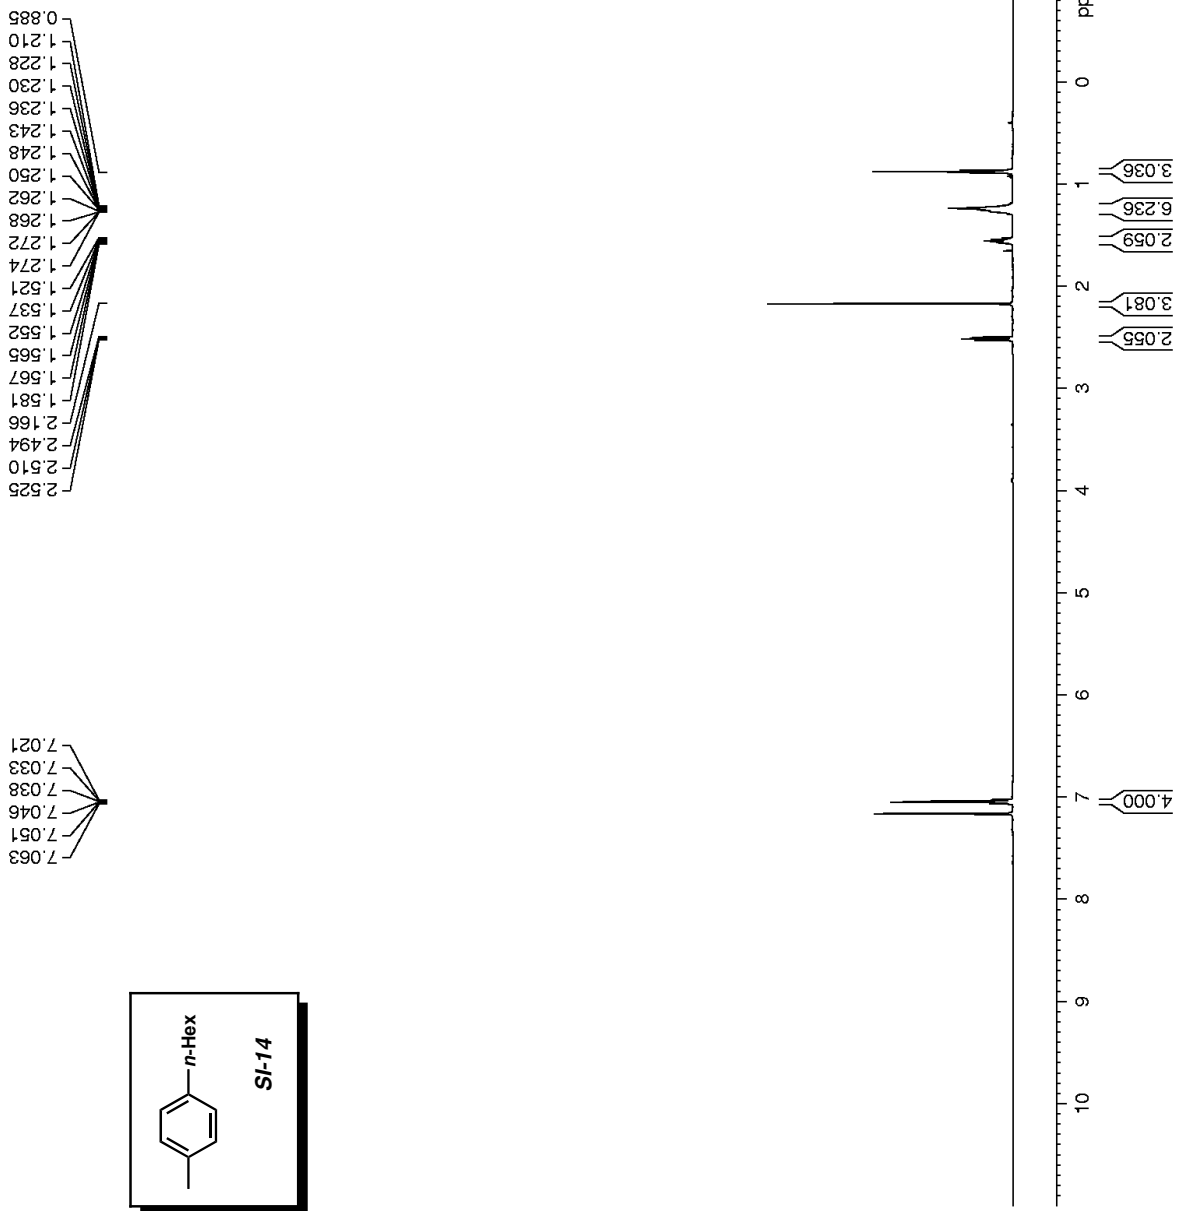

Current Data Parameters  
 NAME AS-II-292\_char  
 EXPNO 250  
 PROCNO 1

F2 – Acquisition Parameters  
 Date\_ 20120203  
 Time 18:20  
 INSTRUM airx400  
 PROBHD 5 mm QNP 1H  
 PULPROG zg30  
 TD 65536  
 SOLVENT C6D6  
 NS 16  
 DS 0  
 SWH 8064.516 Hz  
 FIDRES 0.123055 Hz  
 AQ 4.0632820 sec  
 RG 1430  
 DW 62.000 usec  
 DE 88.57 usec  
 TE 300.0 K  
 D1 2.0000000 sec  
 P1 7.50 usec  
 SFO1 400.1324008 MHz  
 NUCLEUS 1H

F2 – Processing parameters  
 SI 65536  
 SF 400.1300445 MHz  
 WDW EM  
 SSB 0  
 LB 0.30 Hz  
 GB 0  
 PC 1.00

2.529  
2.510  
2.490  
2.179  
1.598  
1.580  
1.577  
1.561  
1.542  
1.523  
1.290  
1.271  
1.268  
1.251  
1.242  
1.236  
1.207  
0.888  
0.871  
0.853

7.151  
7.131  
6.981  
6.979  
6.978  
6.959  
6.957  
6.949  
6.926

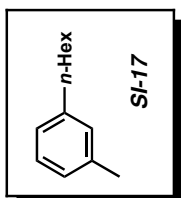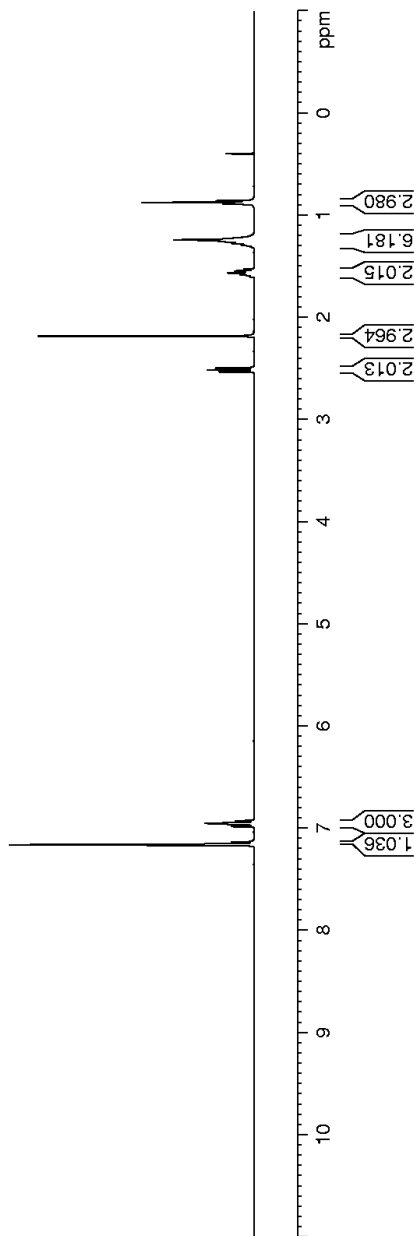

Current Data Parameters  
 NAME SDF3-228  
 EXPNO 3  
 PROCNO 1

F2 - Acquisition Parameters  
 Date\_ 20110901  
 Time 9.17  
 INSTRUM av600  
 PROBHD 5 mm BB5  
 PULPROG zg30  
 TD 65536  
 SOLVENT C6D6  
 NS 16  
 DS 0  
 SWH 12376.237 Hz  
 FIDRES 0.188846 Hz  
 AQ 2.6477449 sec  
 RG 32  
 DW 40.400 usec  
 DE 6.50 usec  
 TE 294.3 K  
 D1 2.00000000 sec  
 TD0 1

==== CHANNEL f1 =====  
 NUC1 1H  
 P1 14.00 usec  
 PL1 -1.00 dB  
 PL1W 31.62277603 W  
 SFO1 600.1336008 MHz

F2 - Processing parameters  
 SI 65536  
 SF 600.1299978 MHz  
 WDW EM  
 SSB 0  
 LB 0.30 Hz  
 GB 0  
 PC 1.00

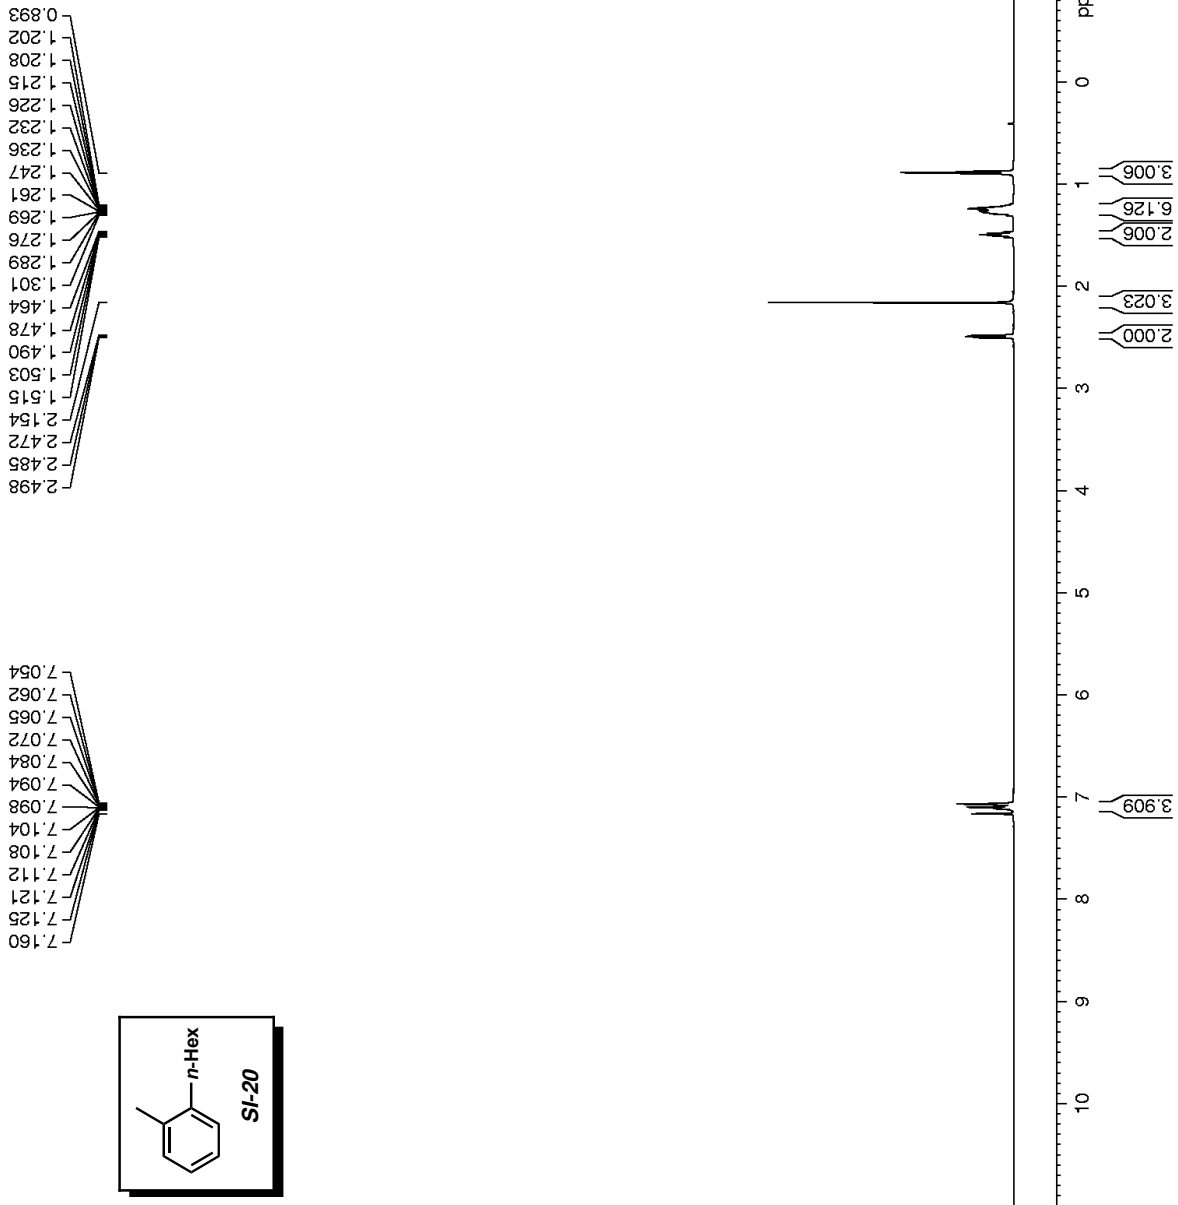

Current Data Parameters  
 SDF3-230  
 NAME  
 EXPNO 10  
 PROCNO 1

F2 - Acquisition Parameters  
 Date\_ 20110901  
 Time 17.09  
 INSTRUM airx500  
 PROBHD 5 mm broadband  
 PULPROG zg30  
 TD 65536  
 SOLVENT C6D6  
 NS 16  
 DS 0  
 SWH 10000.000 Hz  
 FIDRES 0.152588 Hz  
 AQC 3.2768500 sec  
 RG 256  
 DW 50.000 usec  
 DE 71.43 usec  
 TE 300.0 K  
 D1 2.0000000 sec  
 P1 12.20 usec  
 SFO1 500.1330008 MHz  
 NUCLEUS <sup>1</sup>H

F2 - Processing parameters  
 SI 32768  
 SF 500.1299953 MHz  
 WDW EM  
 SSB 0  
 LB 0.30 Hz  
 GB 0  
 PC 1.00

2.630  
2.615  
2.599  
1.492  
1.477  
1.463  
1.452  
1.448  
1.432  
1.162  
1.148  
1.135  
1.127  
1.122  
1.111  
1.107  
1.103  
1.100  
1.092  
1.079  
1.071  
1.062

7.294  
7.291  
7.277  
7.229  
7.207  
7.200  
7.184  
7.180  
7.164  
7.160  
7.142  
7.140  
7.131  
7.128  
7.118  
7.114

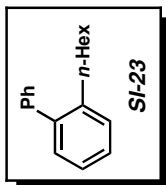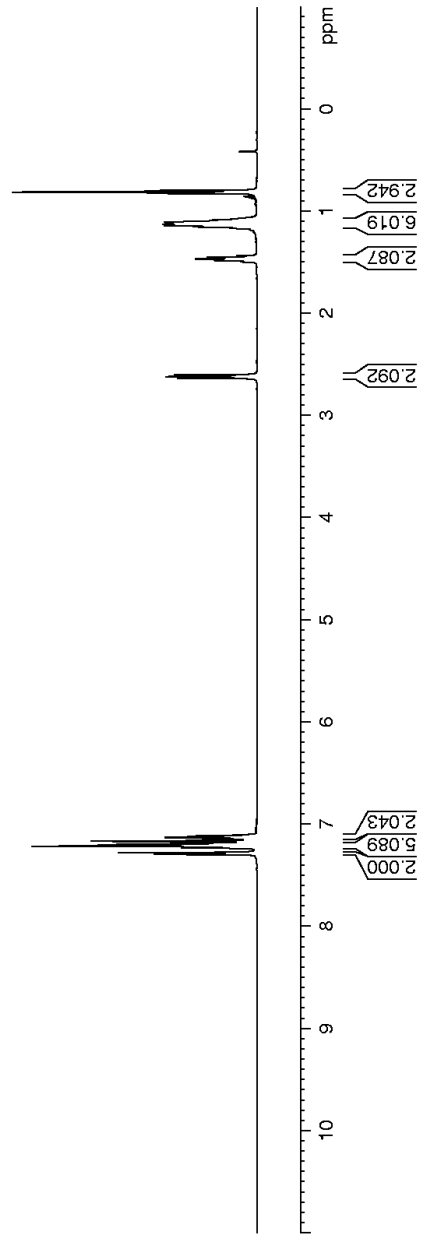

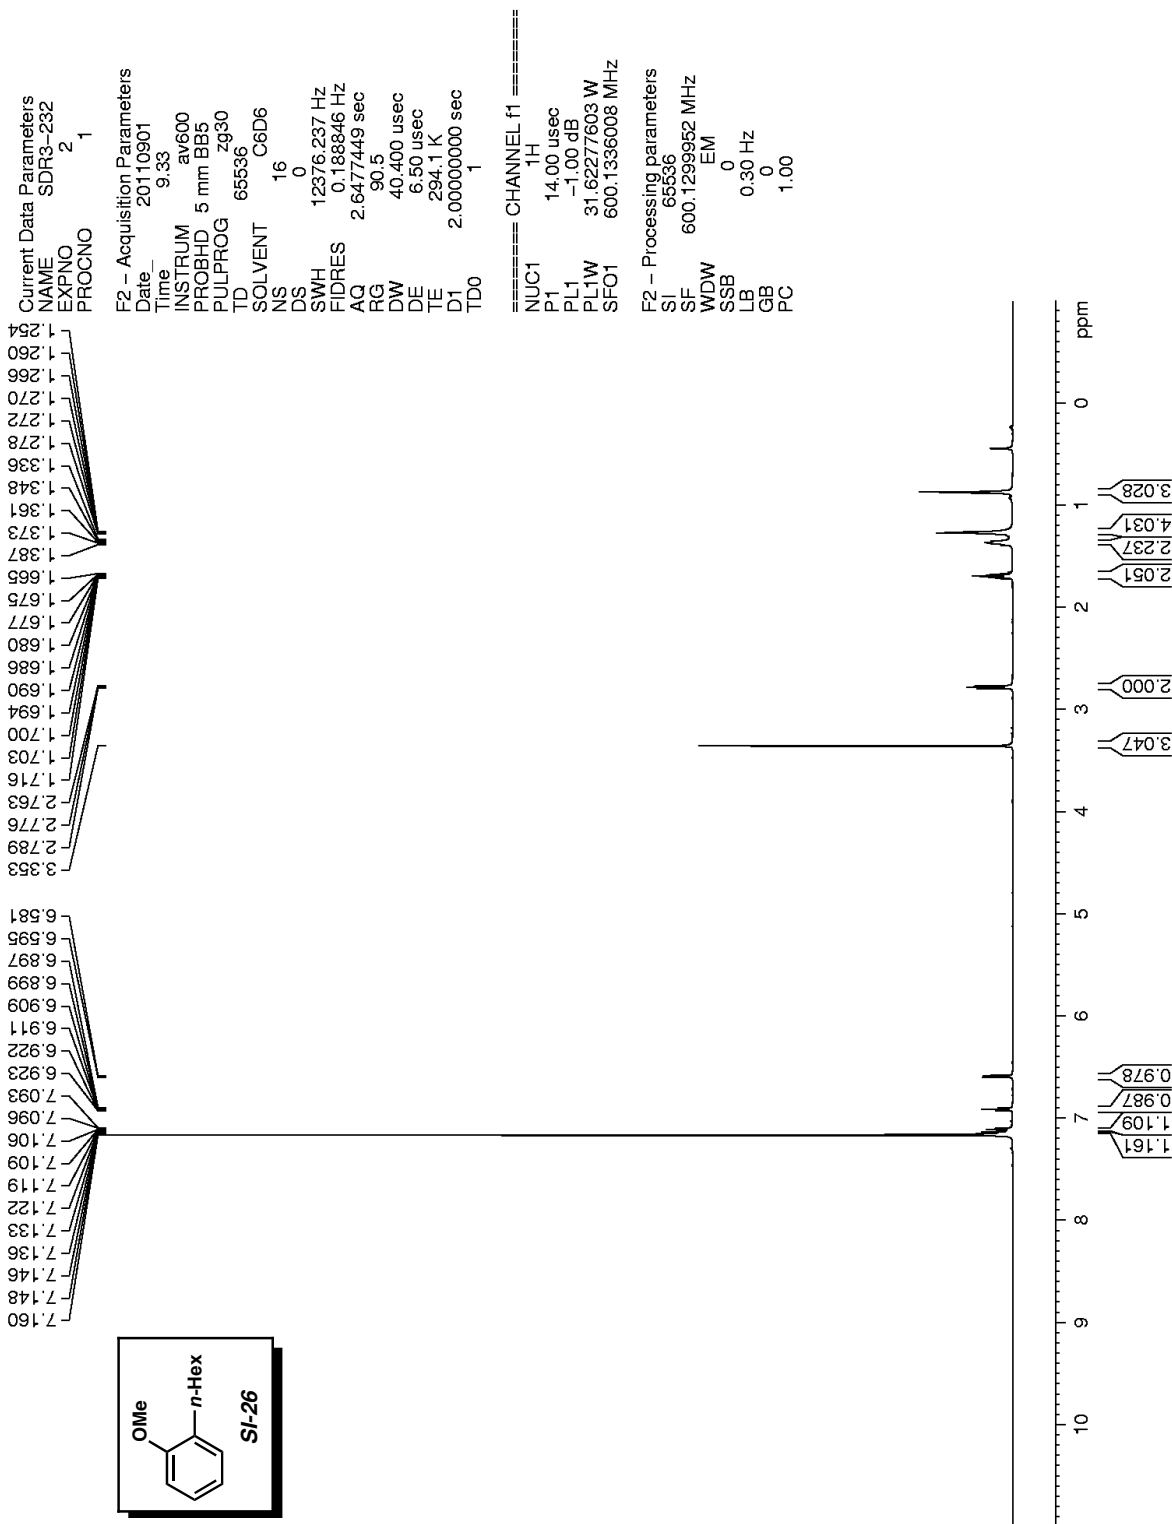



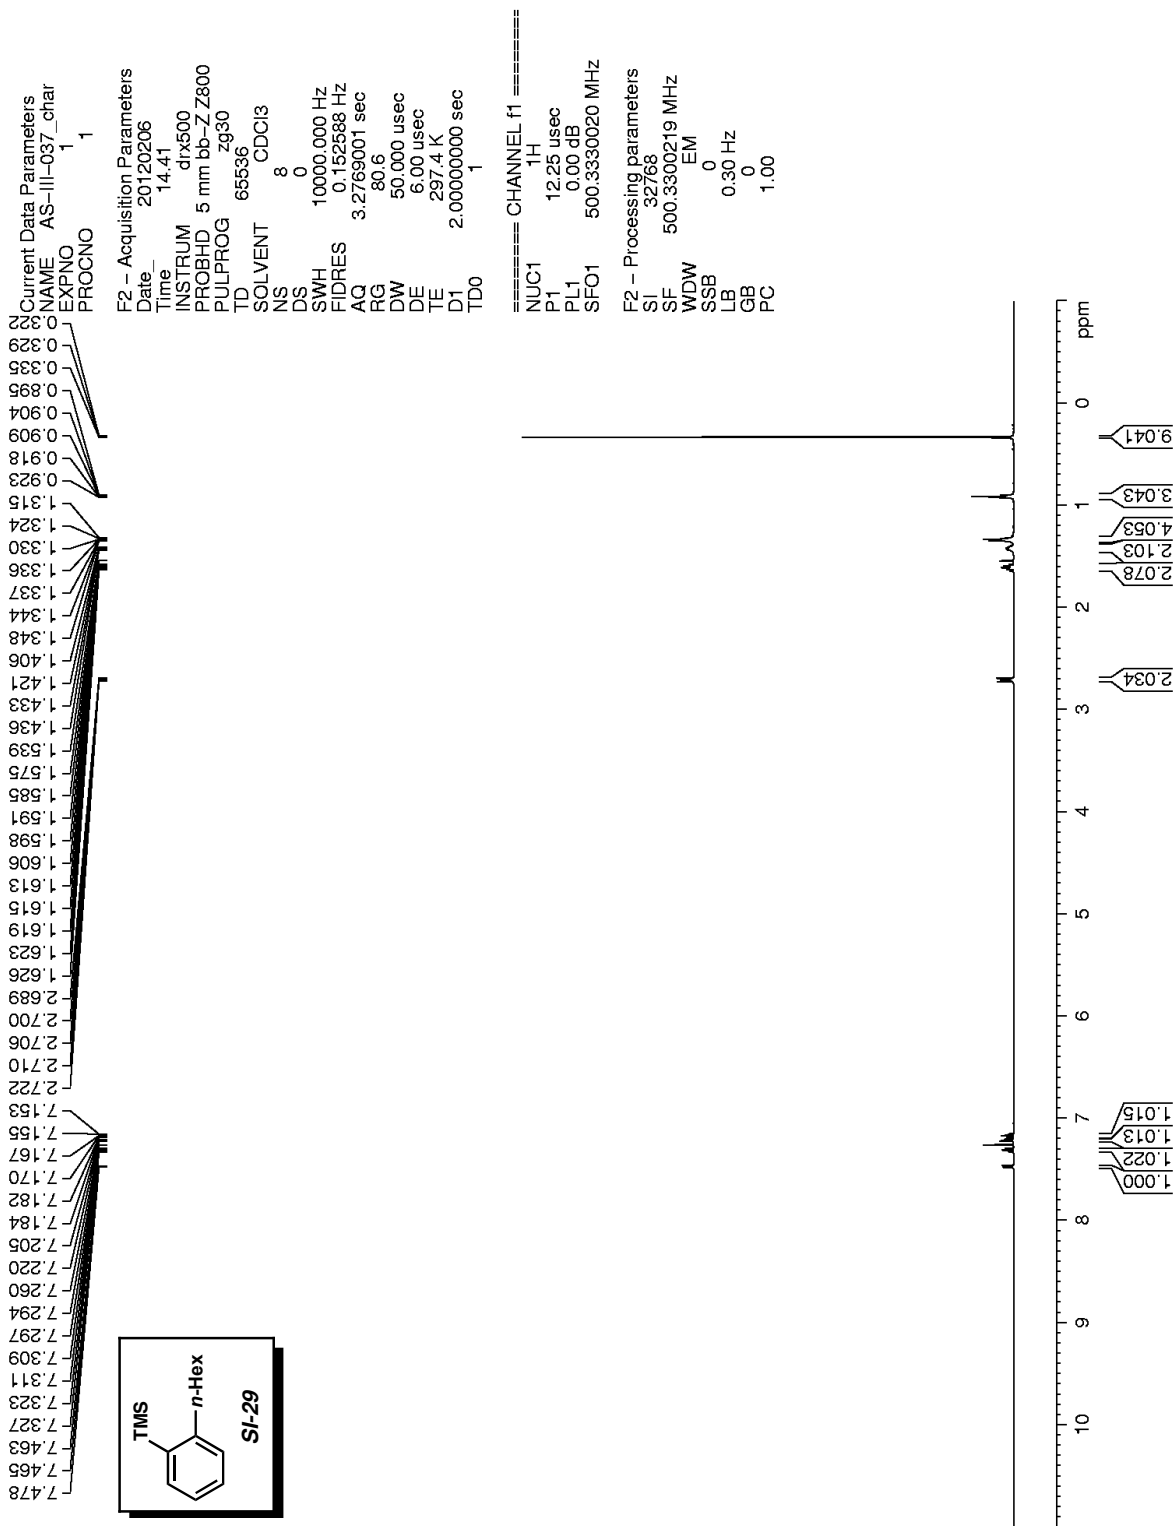

Current Data Parameters  
 NAME AS-III-037\_char  
 EXPNO 2  
 PROCNO 1

F2 - Acquisition Parameters  
 Date\_ 20120206  
 Time 14.50  
 INSTRUM dirx500  
 PROBHD 5 mm bb-Z800  
 PULPROG zgpg30  
 TD 65536  
 SOLVENT CDCI3  
 NS 49  
 DS 0  
 SWH 32679.738 Hz  
 FIDRES 0.498653 Hz  
 AQ 1.0027661 sec  
 RG 4096  
 DW 15.300 usec  
 DE 6.00 usec  
 TE 297.9 K  
 D1 2.00000000 sec  
 d11 0.03000000 sec  
 TDO 1

=====  
 CHANNEL f1  
 NUC1 13C  
 P1 6.20 usec  
 PL1 0.00 dB  
 SFO1 125.8231939 MHz

=====  
 CHANNEL f2  
 CPDPRG2 waltz16  
 NUC2 1H  
 PCPD2 100.00 usec  
 PL2 0.00 dB  
 PL12 16.10 dB  
 SFO2 500.3320013 MHz

F2 - Processing parameters

148.976  
 138.041  
 134.638  
 129.293  
 128.660  
 125.071  
 77.415  
 77.161  
 76.907  
 36.575  
 32.756  
 31.983  
 29.807  
 22.787  
 14.236  
 0.625

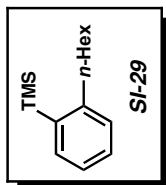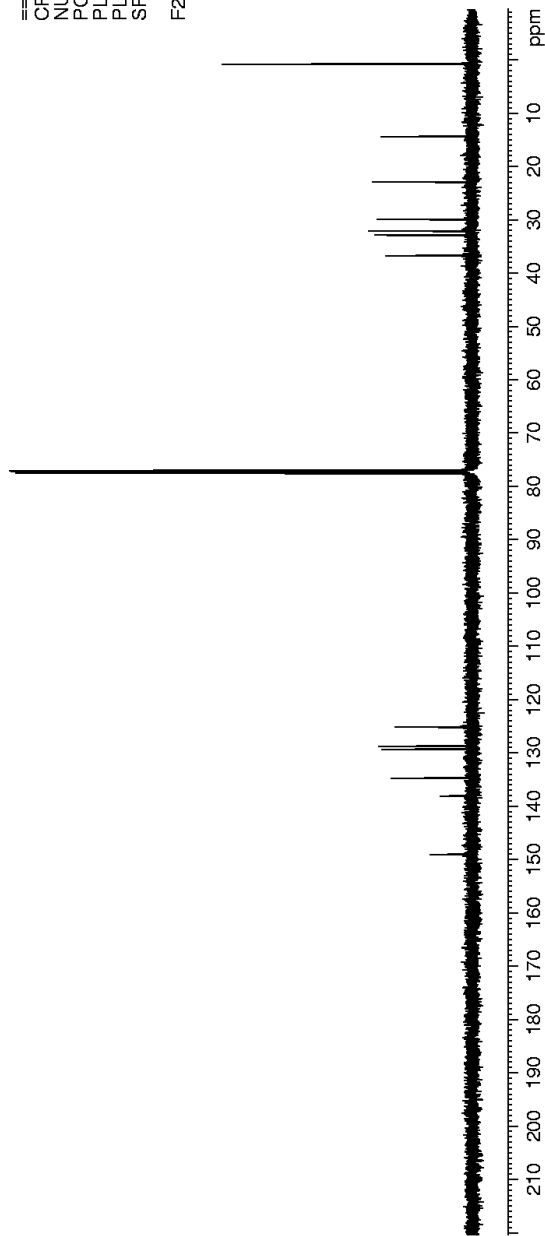

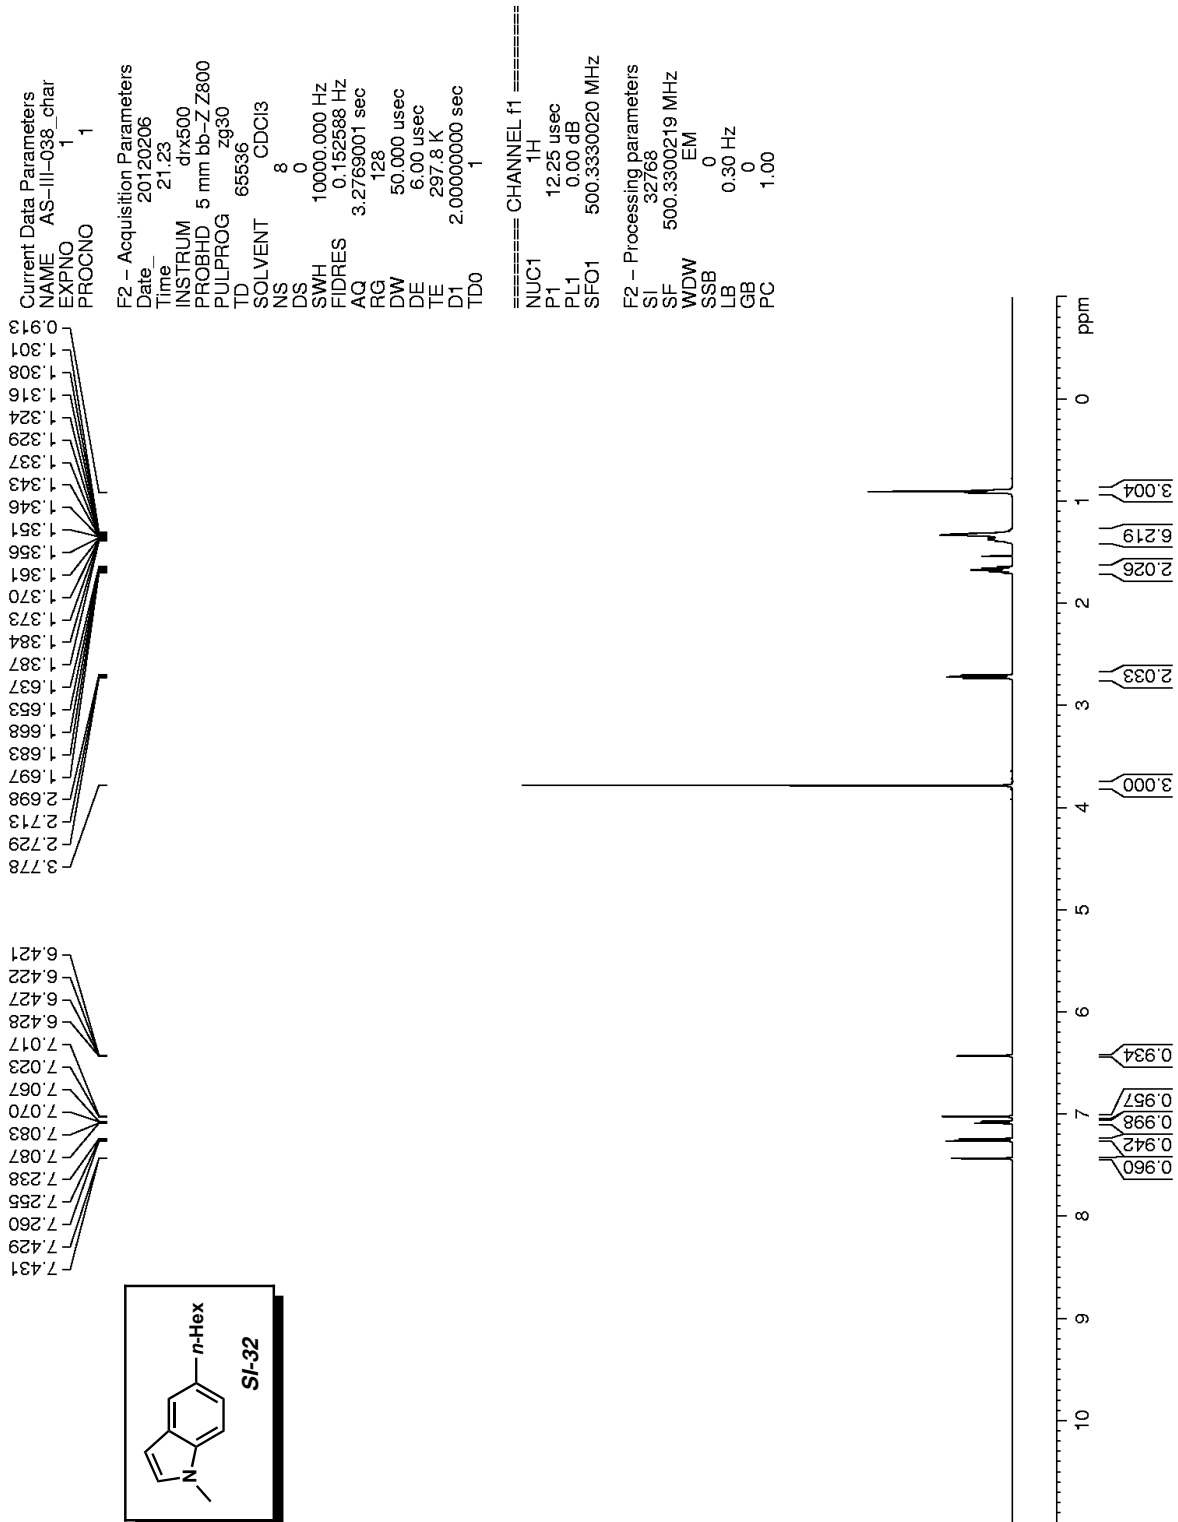

Current Data Parameters  
 NAME AS-III-038\_char  
 EXPNO 2  
 PROCNO 1

F2 - Acquisition Parameters  
 Date\_ 20120206  
 Time 21.29

INSTRUM dirx500  
 PROBHD 5 mm bb-Z Z800  
 PULPROG zgpg30  
 TD 65536  
 SOLVENT CDCI3  
 NS 56  
 DS 0  
 SWH 32679.738 Hz  
 FIDRES 0.498653 Hz  
 AQ 1.0027661 sec  
 RG 13004  
 DW 15.300 usec  
 DE 6.00 usec  
 TE 298.2 K  
 D1 2.00000000 sec  
 d11 0.03000000 sec  
 TDO 1

=====  
 CHANNEL f1  
 NUC1 13C  
 P1 6.20 usec  
 PL1 0.00 dB  
 SFO1 125.8231939 MHz

=====  
 CHANNEL f2  
 CPDPRG2 waltz16  
 NUC2 1H  
 PCPD2 100.00 usec  
 PL2 120.00 dB  
 PL12 16.10 dB  
 SFO2 500.3320013 MHz

F2 - Processing parameters

14.285  
 22.807  
 29.219  
 31.988  
 32.487  
 32.964  
 36.204  
 76.906  
 77.160  
 77.414  
 100.545  
 108.967  
 120.069  
 122.711  
 128.755  
 128.910  
 133.945  
 135.422

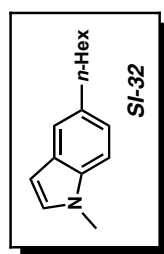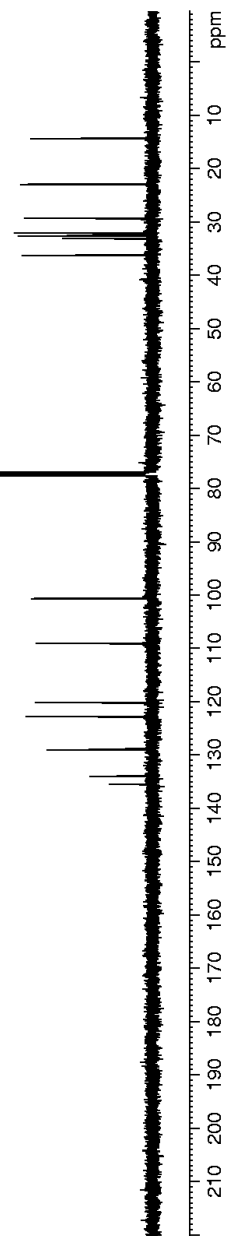

Current Data Parameters  
 NAME AS-III-053\_char  
 EXPNO 2  
 PROCNO 1

F2 - Acquisition Parameters  
 Date\_ 20120206  
 Time 20:58  
 INSTRUM dirx500  
 PROBHD 5 mm bb-Z Z800  
 PULPROG zg30  
 TD 65536  
 SOLVENT CDCI3  
 NS 16  
 DS 0  
 SWH 10000.000 Hz  
 FIDRES 0.152588 Hz  
 AQ 3.2769001 sec  
 RG 203.2  
 DW 50.000 usec  
 DE 6.00 usec  
 TE 297.6 K  
 D1 2.0000000 sec  
 TD0 1

==== CHANNEL f1 =====  
 NUC1 1H  
 P1 12.25 usec  
 PL1 0.00 dB  
 SFO1 500.330020 MHz

F2 - Processing parameters  
 SI 32768  
 SF 500.3300219 MHz  
 WDW EM  
 SSB 0  
 LB 0.30 Hz  
 GB 0  
 PC 1.00

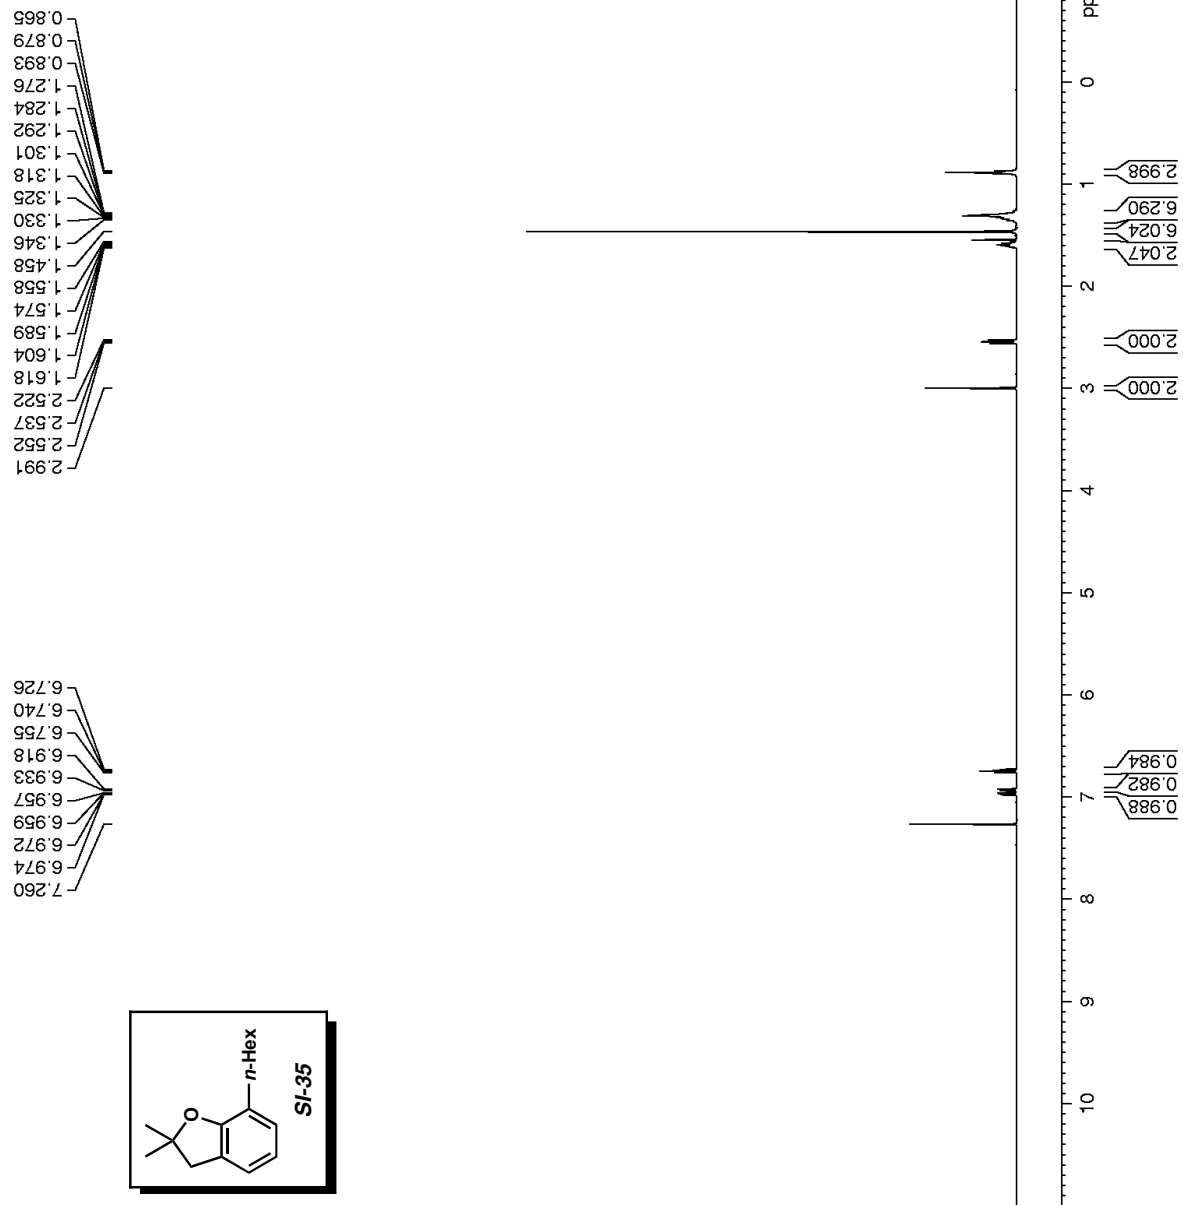

Current Data Parameters  
 NAME AS-III-053\_char  
 EXPNO 4  
 PROCNO 1

F2 - Acquisition Parameters  
 Date\_ 20120206  
 Time 21.19

INSTRUM dirx500  
 PROBHD 5 mm bb-Z Z800  
 PULPROG zgpg30  
 TD 65536  
 SOLVENT CDCl3  
 NS 149  
 DS 0  
 SWH 32679.738 Hz  
 FIDRES 0.498653 Hz  
 AQ 1.0027661 sec  
 RG 13004  
 DW 15.300 usec  
 DE 6.00 usec  
 TE 298.2 K  
 D1 2.00000000 sec  
 d11 0.03000000 sec  
 TDO 1

=====  
 CHANNEL f1  
 NUC1 13C  
 P1 6.20 usec  
 PL1 0.00 dB  
 SFO1 125.8231939 MHz

=====  
 CHANNEL f2  
 CPDPRG2 waltz16  
 NUC2 1H  
 PCPD2 100.00 usec  
 PL2 0.00 dB  
 PL12 16.10 dB  
 SFO2 500.3320013 MHz

F2 - Processing parameters

157.329  
 128.188  
 126.595  
 124.830  
 122.554  
 119.762  
 85.909  
 76.906  
 77.160  
 77.414  
 43.309  
 31.913  
 29.907  
 29.744  
 29.186  
 28.405  
 22.798  
 14.267

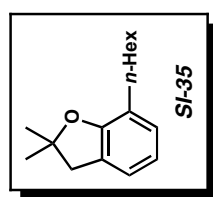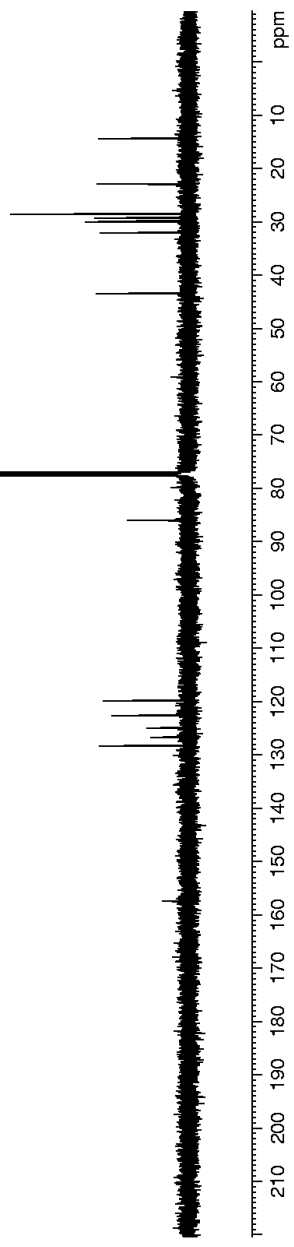

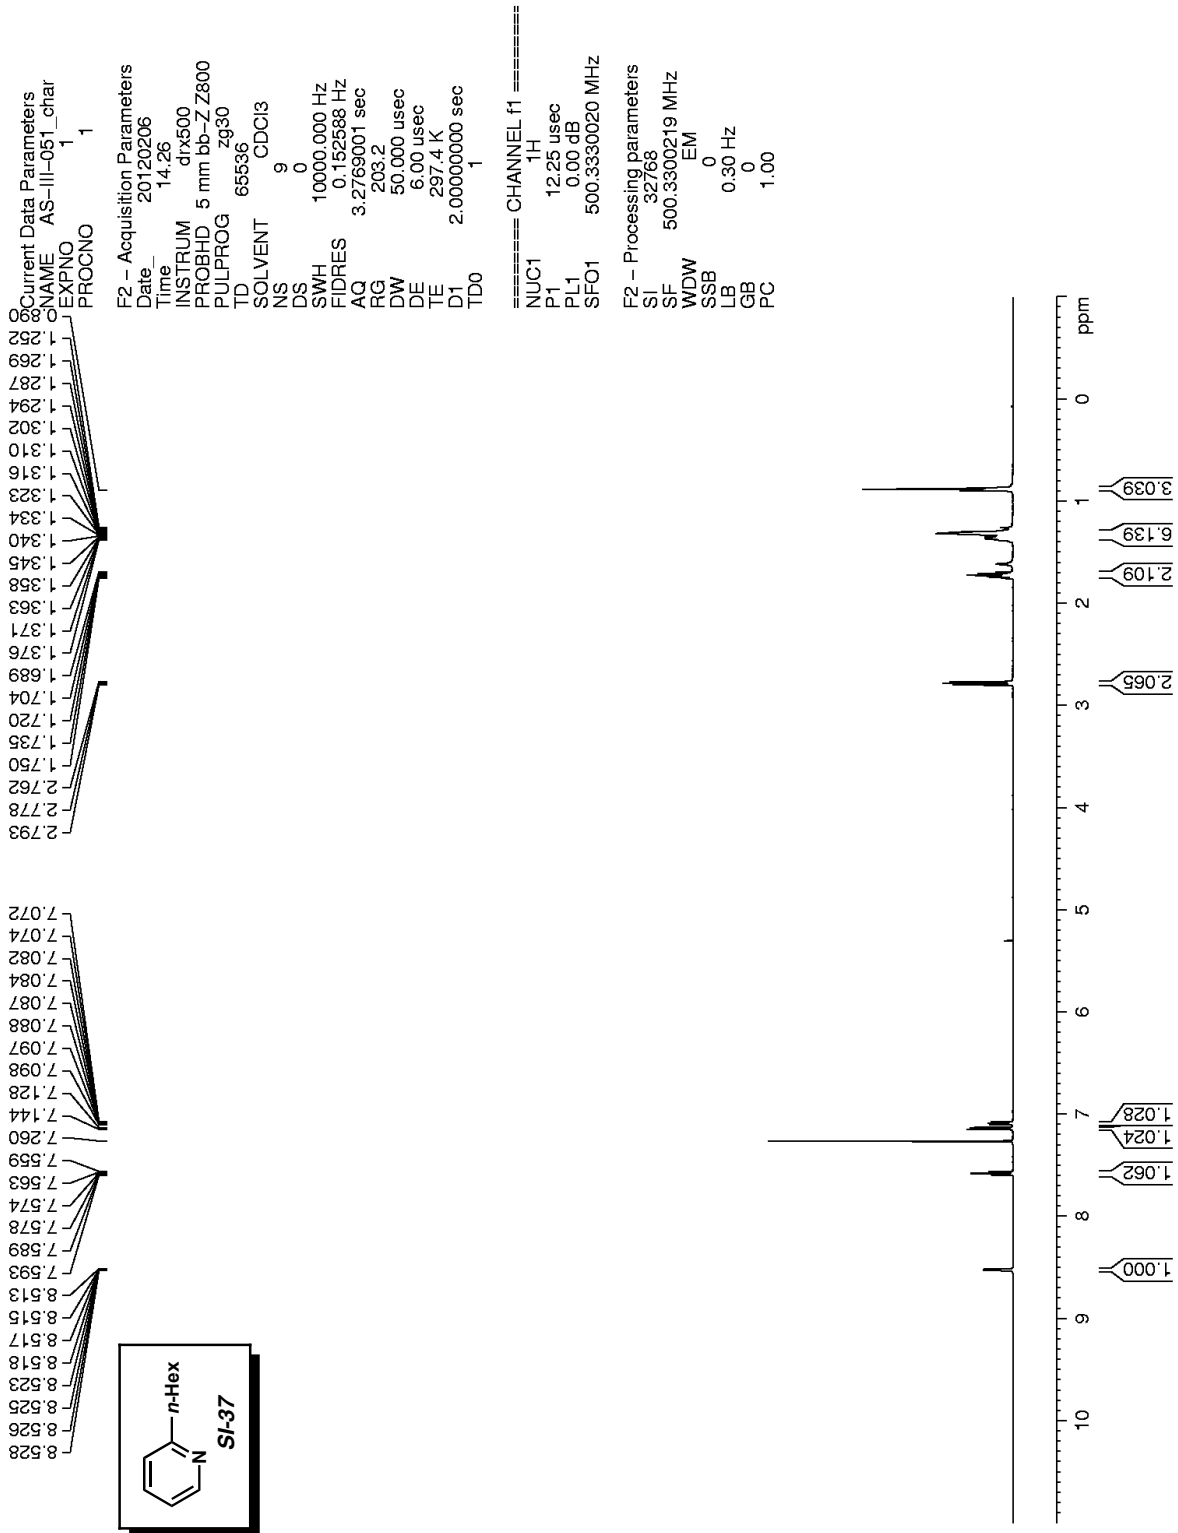

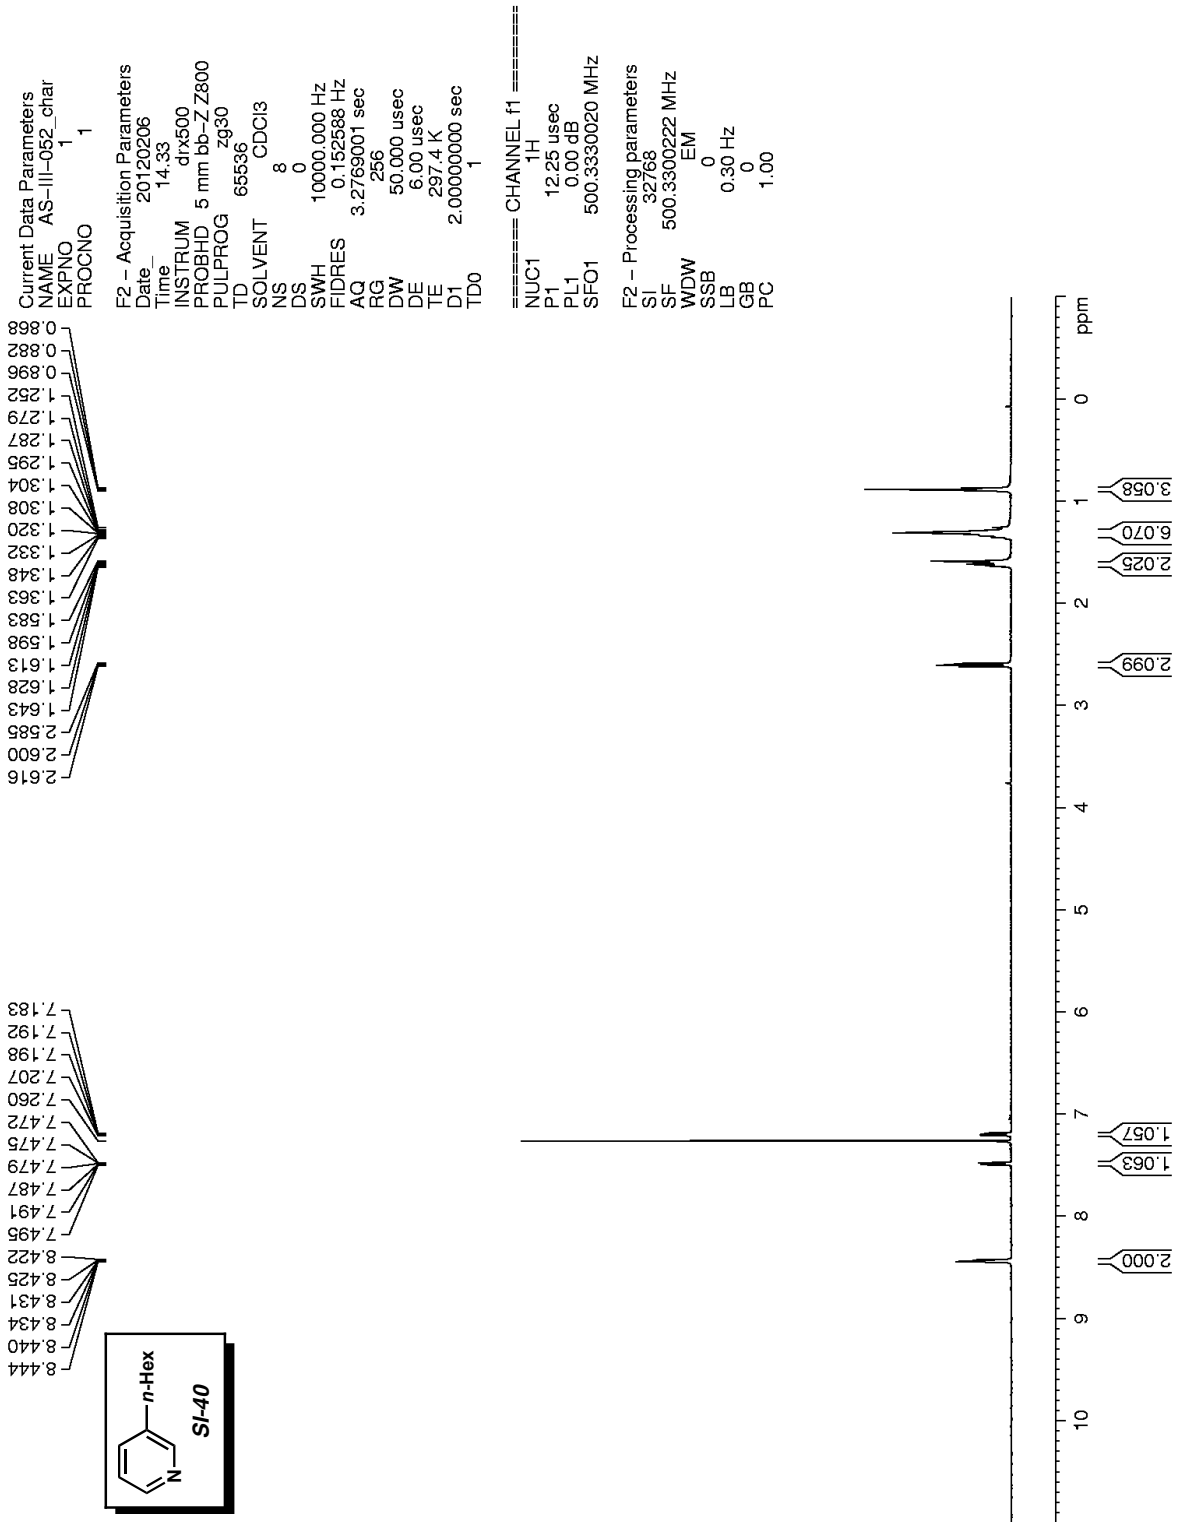



Current Data Parameters  
 NAME SDR4-061  
 EXPNO 11  
 PROCNO 1

F2 - Acquisition Parameters

Date\_ 20111026  
 Time 20:17  
 INSTRUM av600  
 PROBHD 5 mm BB5  
 PULPROG zg30  
 TD 65536  
 SOLVENT CDCI3  
 NS 16  
 DS 0  
 SWH 12376.237 Hz  
 FIDRES 0.188846 Hz  
 AQ 2.6477449 sec  
 RG 114  
 DW 40.400 usec  
 DE 6.50 usec  
 TE 294.0 K  
 D1 2.00000000 sec  
 TD0 1

==== CHANNEL f1 =====

NUC1 1H  
 P1 14.00 usec  
 PL1 -1.00 dB  
 PL1W 31.62277603 W  
 SFO1 600.1336008 MHz

F2 - Processing parameters

SI 65536  
 SF 600.1300286 MHz  
 WDW EM  
 SSB 0  
 LB 0.30 Hz  
 GB 0  
 PC 1.00

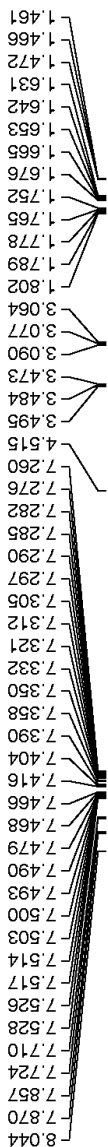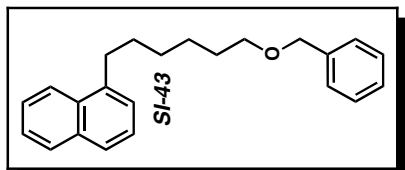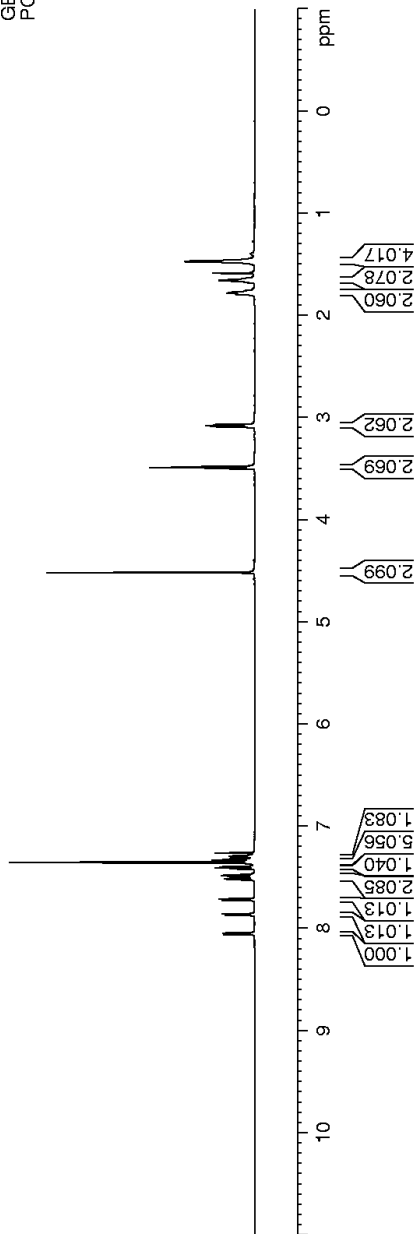

Current Data Parameters  
 NAME SDR4-061  
 EXPNO 3  
 PROCNO 1

F2 - Acquisition Parameters  
 Date\_ 20111024  
 Time 20:17  
 INSTRUM av600  
 PROBHD 5 mm BB5  
 PULPROG zgpg30  
 TD 65536  
 SOLVENT CDCI3  
 NS 51  
 DS 0  
 SWH 37593.984 Hz  
 FIDRES 0.573639 Hz  
 AQC 0.8716921 sec  
 RG 18390.4  
 DW 13.300 usec  
 DE 6.50 usec  
 TE 294.9 K  
 D1 2.00000000 sec  
 D11 0.03000000 sec  
 TD0 1

=====  
 CHANNEL f1  
 NUC1 13C  
 P1 9.75 usec  
 PL1 0.00 dB  
 PL1W 75.35659027 W  
 SFO1 150.9209173 MHz

=====  
 CHANNEL f2  
 CPDPRG2 waltz16  
 NUC2 1H  
 PCPD2 80.00 usec  
 PL2 -1.00 dB  
 PL12 14.14 dB  
 PL2W 31.62277603 W  
 PL12W 0.96827775 W

26.217  
 29.736  
 29.850  
 30.886  
 33.151

70.499  
 72.953

123.979  
 125.458  
 125.627  
 125.734  
 125.939  
 126.520  
 127.583  
 127.726  
 128.451  
 128.841  
 131.992  
 133.982  
 138.788  
 138.970

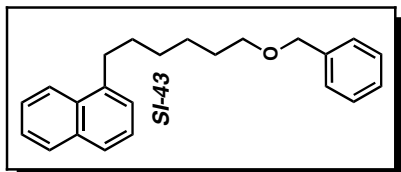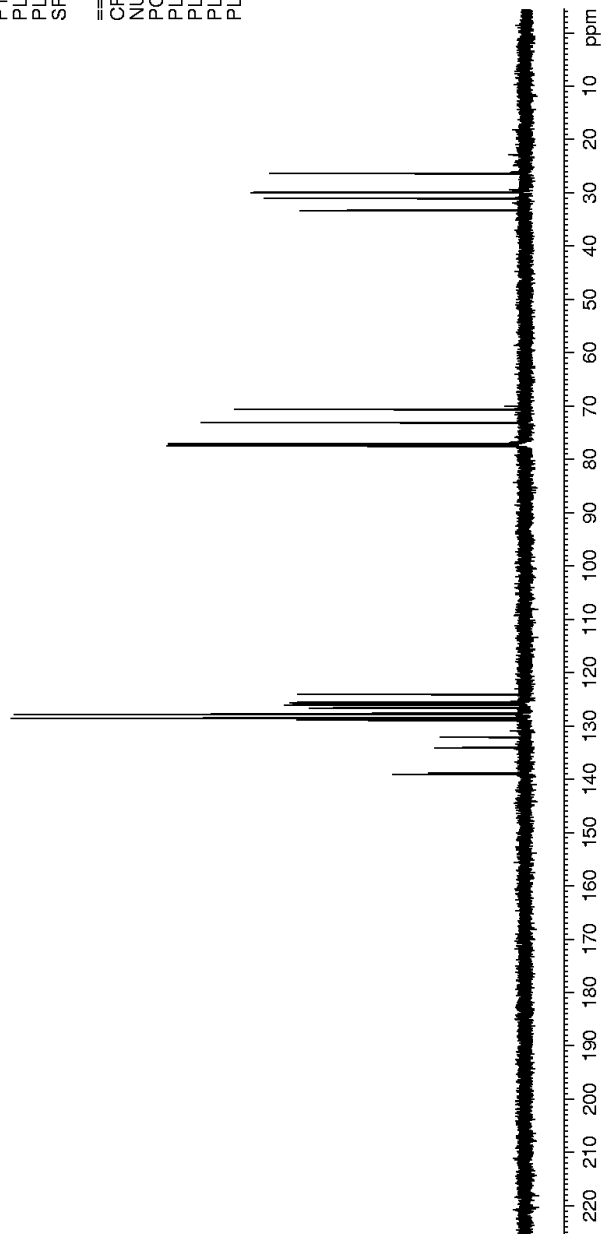

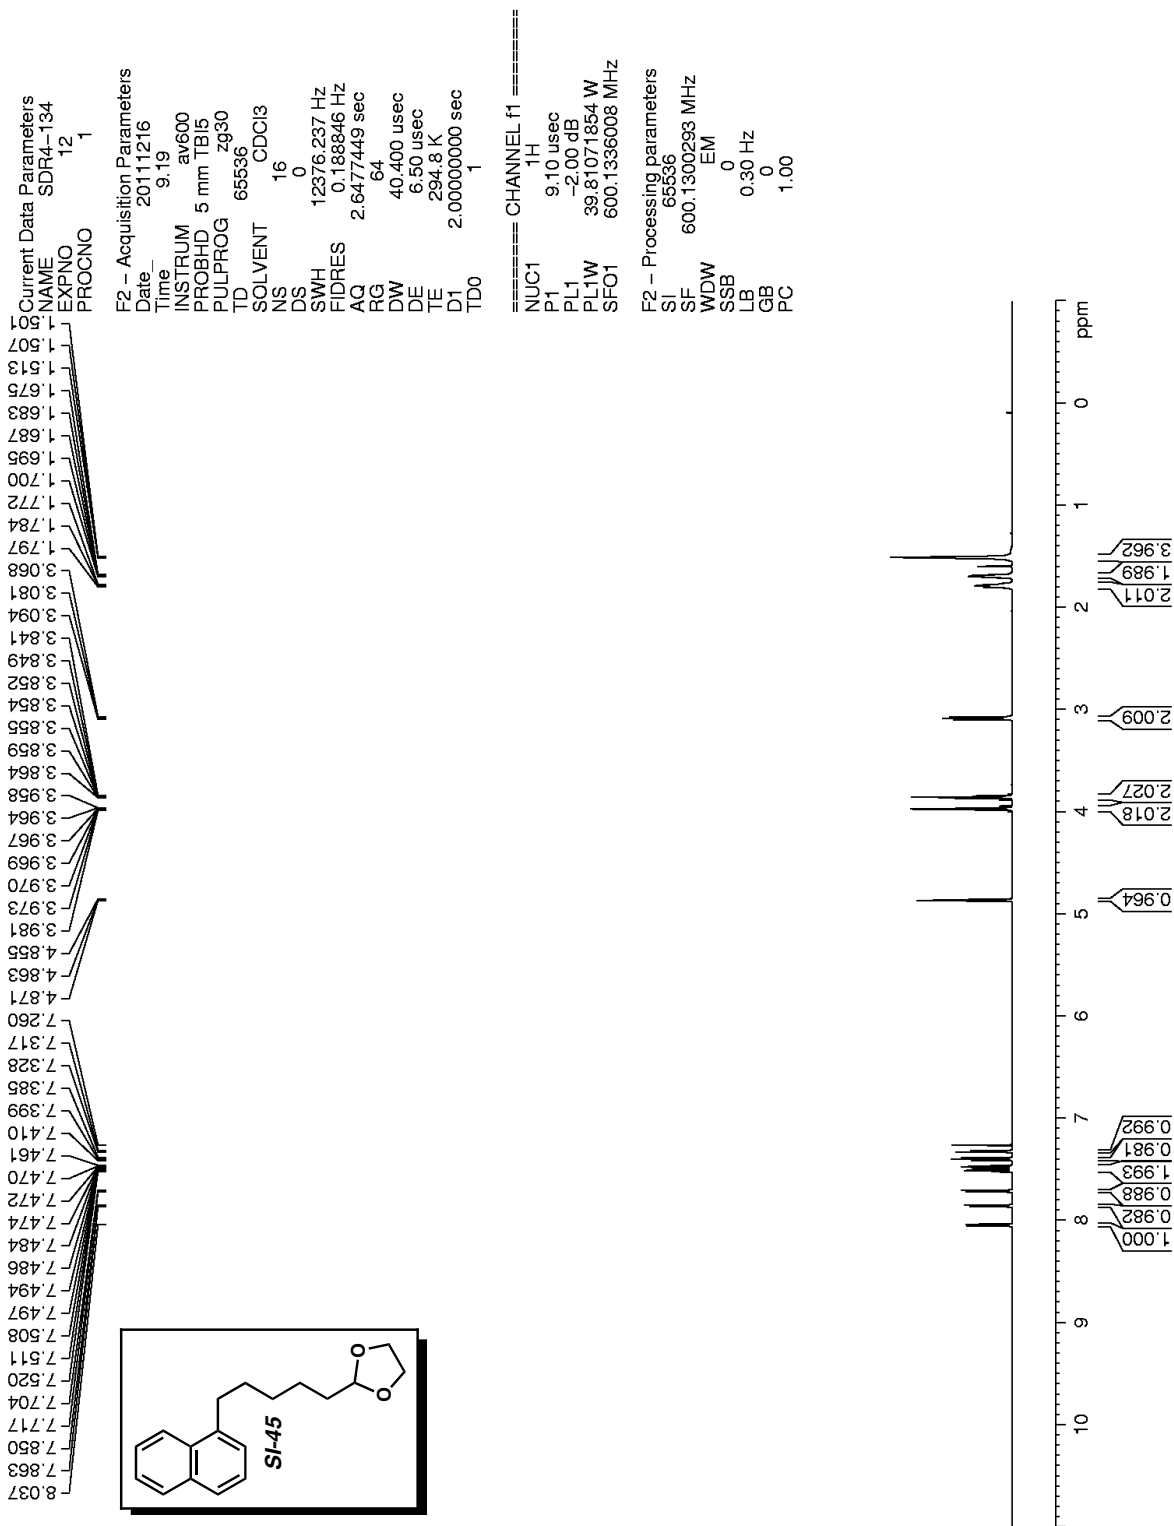

Current Data Parameters  
 NAME SDR4-134  
 EXPNO 112  
 PROCNO 1

F2 - Acquisition Parameters  
 Date\_ 20111216  
 Time 9:27  
 INSTRUM av600  
 PROBHD 5 mm TBI5  
 PULPROG zgpg30  
 TD 65536  
 SOLVENT CDCI3  
 NS 212  
 DS 0  
 SWH 37593.984 Hz  
 FIDRES 0.573639 Hz  
 AQ 0.8716921 sec  
 RG 18390.4  
 DW 13.300 usec  
 DE 6.50 usec  
 TE 294.9 K  
 D1 2.00000000 sec  
 D11 0.03000000 sec  
 TD0 1

=====  
 CHANNEL f1  
 NUC1 13C  
 P1 9.75 usec  
 PL1 0.00 dB  
 PL1W 75.35659027 W  
 SFO1 150.9209173 MHz

=====  
 CHANNEL f2  
 CPDPRG2 waltz16  
 NUC2 1H  
 PCPD2 80.00 usec  
 PL2 -1.00 dB  
 PL12 14.14 dB  
 PL2W 31.62277603 W  
 PL12W 0.96827775 W

138.963  
 134.055  
 132.061  
 128.875  
 126.572  
 125.978  
 125.775  
 125.659  
 125.491  
 124.011  
 104.778  
 64.988  
 34.045  
 33.111  
 30.871  
 29.849  
 24.096

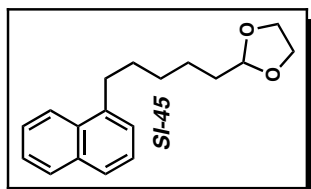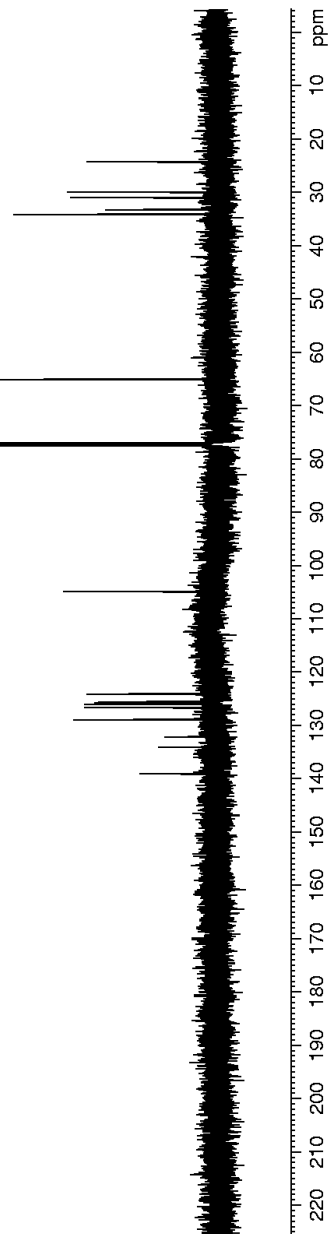

Current Data Parameters  
 NAME SDF4-106  
 EXPNO 11  
 PROCNO 1

F2 - Acquisition Parameters  
 Date\_ 20111201  
 Time 11.00  
 INSTRUM av600  
 PROBHD 5 mm TBI5  
 PULPROG zg30  
 TD 65536  
 SOLVENT CDCI3  
 NS 16  
 DS 0  
 SWH 12376.237 Hz  
 FIDRES 0.188846 Hz  
 AQ 2.6477449 sec  
 RG 57  
 DW 40.400 usec  
 DE 6.50 usec  
 TE 294.1 K  
 D1 2.00000000 sec  
 TD0 1

===== CHANNEL f1 =====  
 NUC1 1H  
 P1 9.10 usec  
 PL1 -2.00 dB  
 PL1W 39.81071854 W  
 SFO1 600.1336008 MHz

F2 - Processing parameters  
 SI 65536  
 SF 600.1300292 MHz  
 WDW EM  
 SSB 0  
 LB 0.30 Hz  
 GB 0  
 PC 1.00

8.030  
8.016  
7.885  
7.873  
7.870  
7.749  
7.736  
7.538  
7.536  
7.527  
7.525  
7.513  
7.511  
7.507  
7.505  
7.494  
7.482  
7.481  
7.435  
7.423  
7.410  
7.360  
7.357  
7.350  
7.260  
6.333  
6.330  
6.328  
6.325  
6.061  
6.056

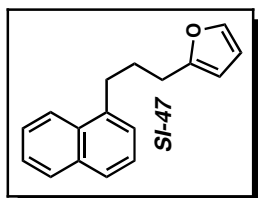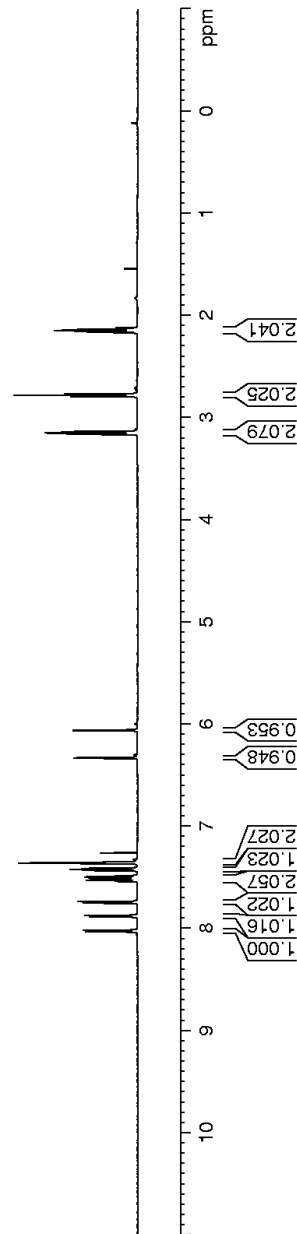

Current Data Parameters  
 NAME SDR4-106  
 EXPNO 111  
 PROCNO 1

F2 - Acquisition Parameters

Date\_ 20111201  
 Time 11.11  
 INSTRUM av600  
 PROBHD 5 mm TBI5  
 PULPROG zgpg30  
 TD 65536  
 SOLVENT CDCl3  
 NS 100  
 DS 0  
 SWH 37593.984 Hz  
 FIDRES 0.573639 Hz  
 AQ 0.8716921 sec  
 RG 20642.5  
 DW 13.300 usec  
 DE 6.50 usec  
 TE 294.3 K  
 D1 2.00000000 sec  
 D11 0.03000000 sec  
 TDO 1

=====  
 CHANNEL f1  
 NUC1 13C  
 P1 9.75 usec  
 PL1 0.00 dB  
 PL1W 75.35659027 W  
 SFO1 150.9209173 MHz

=====  
 CHANNEL f2  
 CPDPRG2 waltz16  
 NUC2 1H  
 PCPD2 80.00 usec  
 PL2 -1.00 dB  
 PL12 14.14 dB  
 PL2W 31.62277603 W  
 PL12W 0.96827775 W

32.489  
 29.118  
 28.008

77.372  
 77.160  
 76.948

156.072  
 141.000  
 138.208  
 134.068  
 132.014  
 128.915  
 126.810  
 126.203  
 125.898  
 125.650  
 125.571  
 123.915  
 110.266  
 105.187

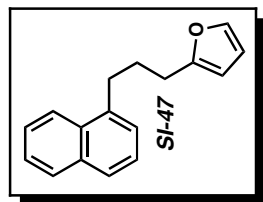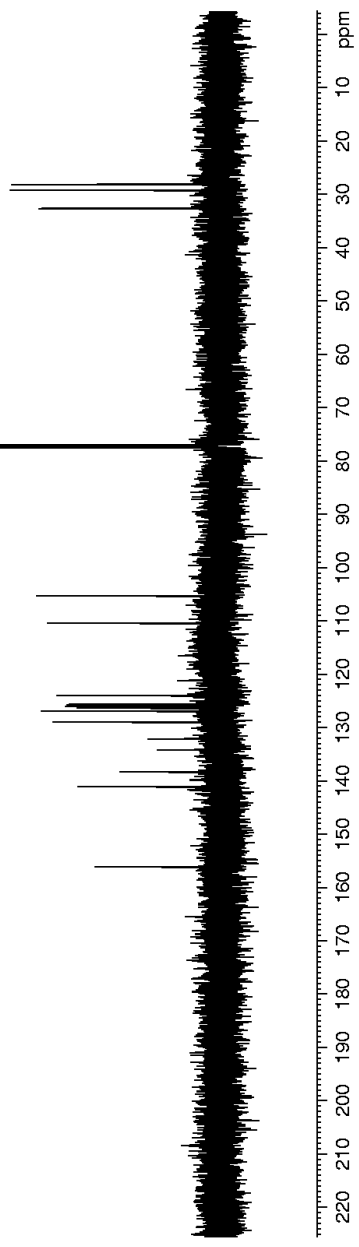

Current Data Parameters  
 NAME SDF4-026  
 EXPNO 1  
 PROCNO 1

F2 - Acquisition Parameters  
 Date\_ 20110929  
 Time 7.46  
 INSTRUM avance500  
 PROBHD 5 mm bb-Z Z800  
 PULPROG zg30  
 TD 65536  
 SOLVENT CDCI3  
 NS 16  
 DS 0  
 SWH 10000.000 Hz  
 FIDRES 0.152588 Hz  
 AQ 3.2769001 sec  
 RG 50.8  
 DW 50.000 usec  
 DE 6.00 usec  
 TE 296.5 K  
 D1 2.00000000 sec  
 MCREST 0.00000000 sec  
 MCWRK 0.01500000 sec

===== CHANNEL f1 =====  
 NUC1 1H  
 P1 12.25 usec  
 PL1 0.00 dB  
 SFO1 500.3330020 MHz

F2 - Processing parameters  
 SI 32768  
 SF 500.3300213 MHz  
 WDW EM  
 SSB 0  
 LB 0.30 Hz  
 GB 0  
 PC 1.00

1.080  
 1.094  
 2.144  
 2.158  
 2.171  
 2.184  
 2.198  
 2.211  
 2.224  
 3.029  
 3.043

7.260  
 7.375  
 7.388  
 7.475  
 7.491  
 7.505  
 7.543  
 7.557  
 7.570  
 7.574  
 7.575  
 7.579  
 7.593  
 7.595  
 7.606  
 7.609  
 7.609  
 7.806  
 7.822  
 7.941  
 7.956  
 8.133  
 8.149

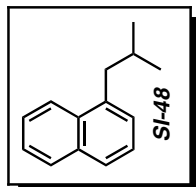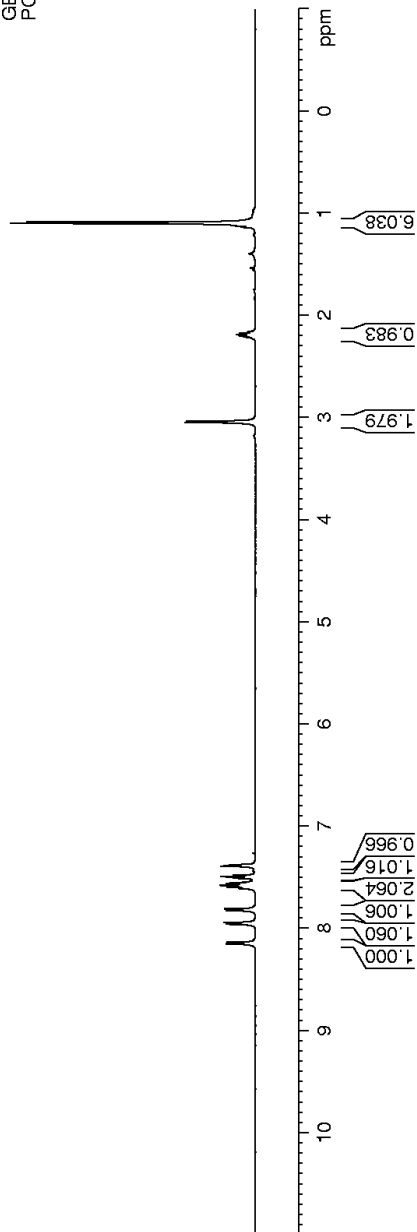

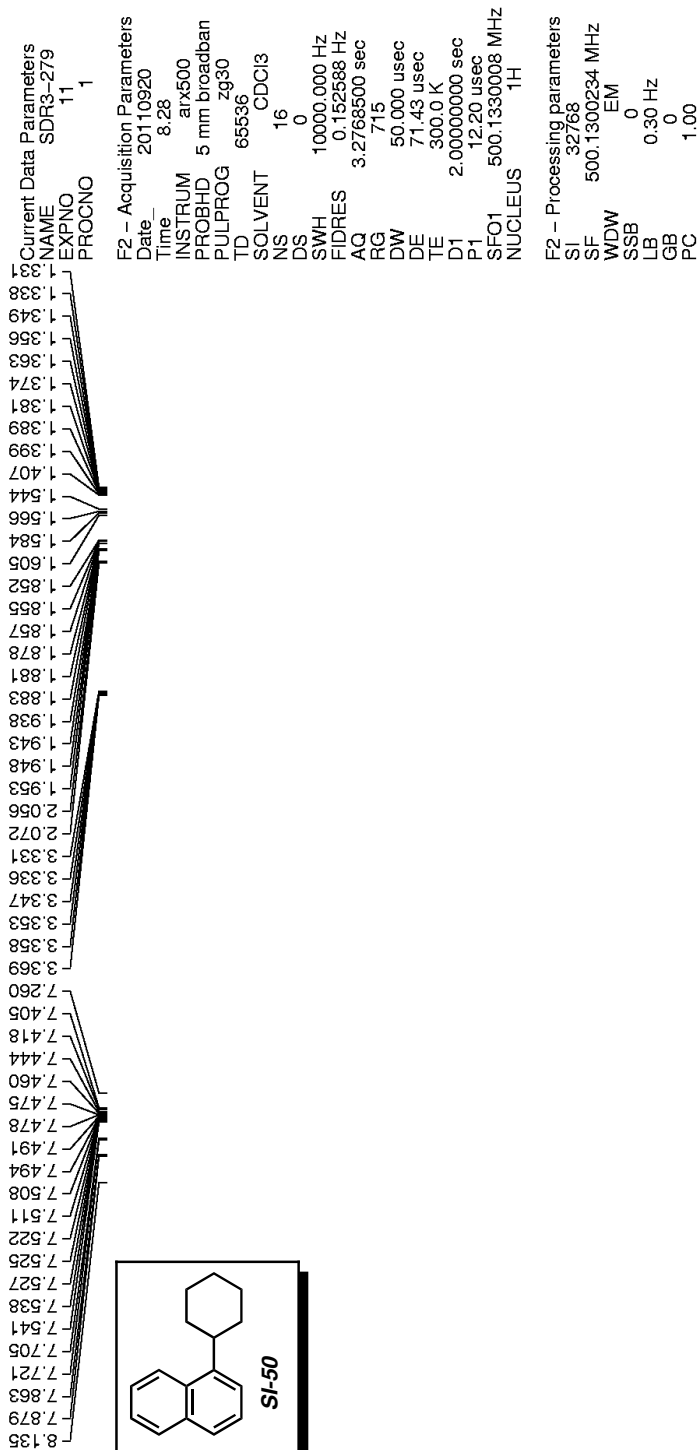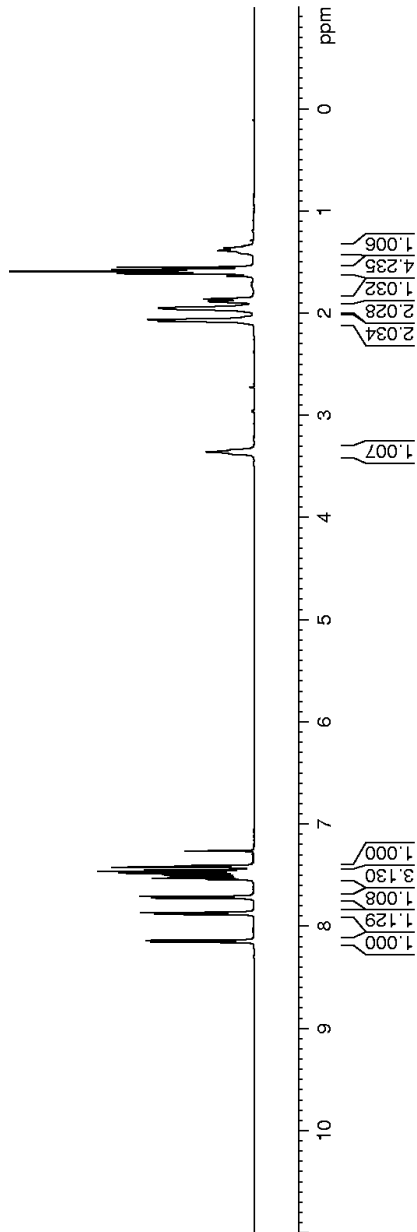



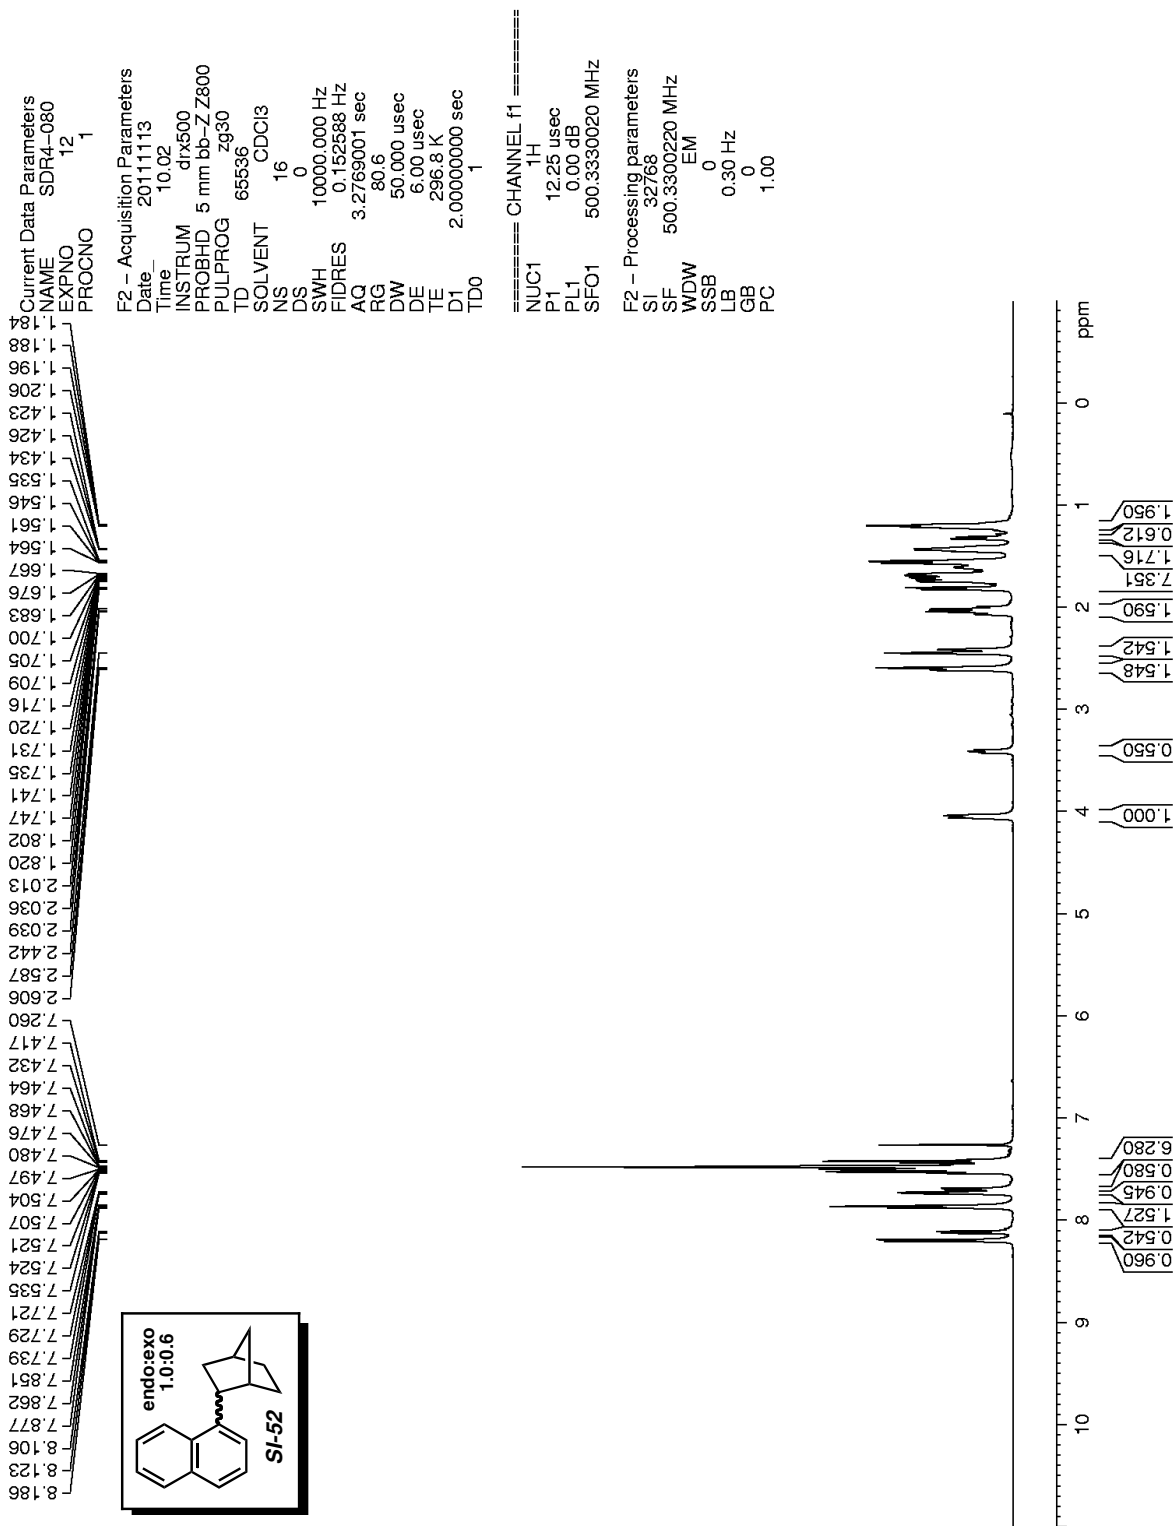

Current Data Parameters  
 NAME SDF4-080  
 EXPNO 112  
 PROCNO 1

F2 - Acquisition Parameters  
 Date\_ 20111113  
 Time 10.06  
 INSTRUM dirx500  
 PROBHD 5 mm bb-Z Z800  
 PULPROG zgpg30  
 TD 65536  
 SOLVENT CDCI3  
 NS 256  
 DS 0  
 SWH 32679.738 Hz  
 FIDRES 0.498653 Hz  
 AQ 1.0027661 sec  
 RG 4096  
 DW 15.300 usec  
 DE 6.00 usec  
 TE 296.9 K  
 D1 2.00000000 sec  
 d11 0.03000000 sec  
 TDO 1

=====  
 CHANNEL f1  
 NUC1 13C  
 P1 6.20 usec  
 PL1 0.00 dB  
 SFO1 125.8231939 MHz

=====  
 CHANNEL f2  
 CPDPRG2 waltz16  
 NUC2 1H  
 PCPD2 100.00 usec  
 PL2 120.00 dB  
 PL12 16.10 dB  
 SFO2 500.3320013 MHz

F2 - Processing parameters

143.195  
 138.800  
 134.217  
 134.137  
 133.100  
 132.119  
 128.953  
 128.893  
 126.587  
 126.167  
 125.657  
 125.474  
 125.416  
 125.350  
 125.224  
 124.443  
 124.082  
 123.446  
 121.766

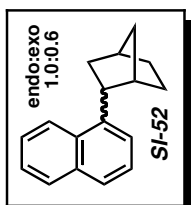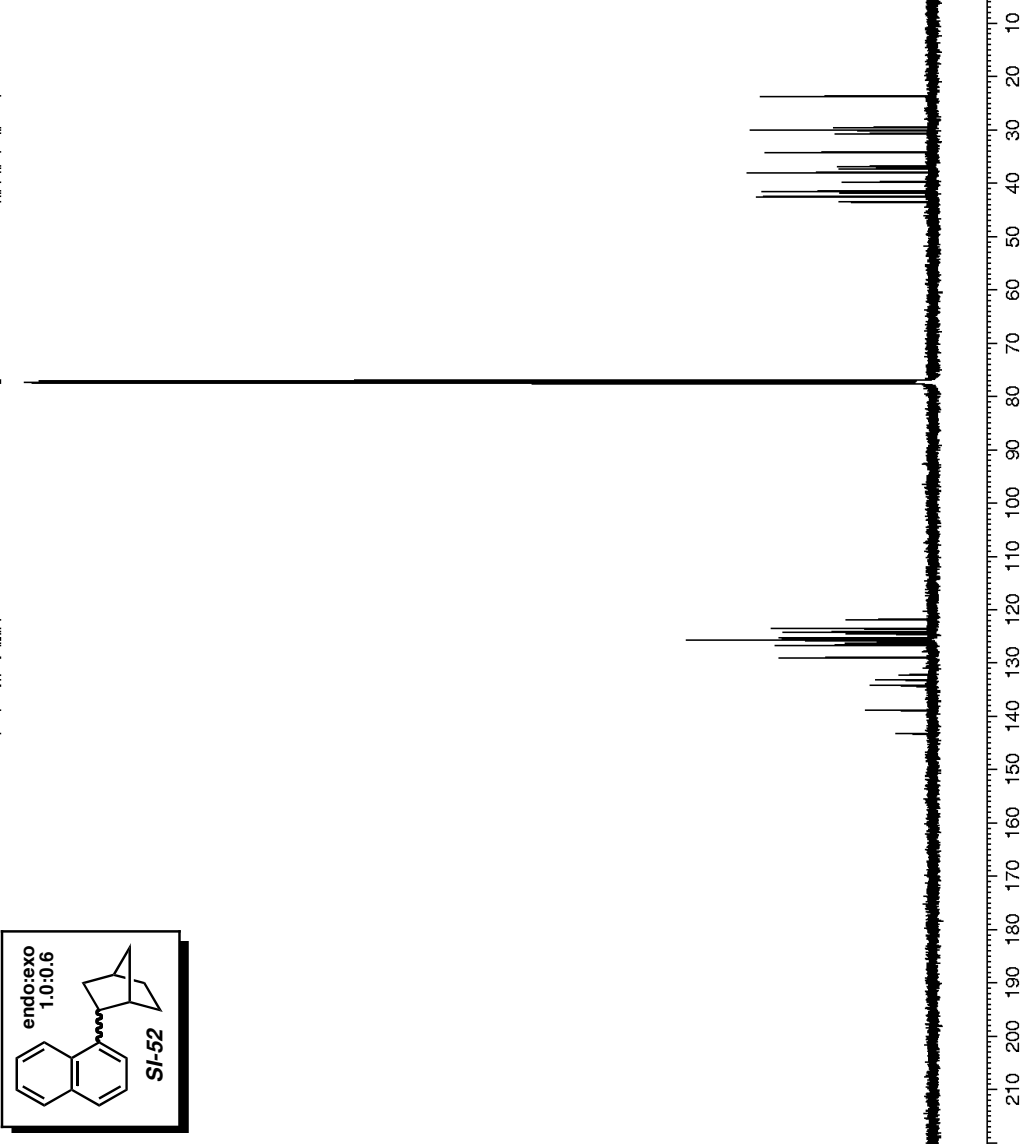

Current Data Parameters  
 NAME SDR4-042  
 EXPNO 4  
 PROCNO 1

F2 - Acquisition Parameters

Date\_ 20111017  
 Time 18:34  
 INSTRUM av600  
 PROBHD 5 mm TBI5  
 PULPROG zg30  
 TD 65536  
 SOLVENT CDCI3  
 NS 16  
 DS 0  
 SWH 12376.237 Hz  
 FIDRES 0.188846 Hz  
 AQ 2.6477449 sec  
 RG 114  
 DW 40.400 usec  
 DE 6.50 usec  
 TE 294.0 K  
 D1 2.00000000 sec  
 TD0 1

==== CHANNEL f1 =====

NUC1 1H  
 P1 9.10 usec  
 PL1 -2.00 dB  
 PL1W 39.81071854 W  
 SFO1 600.1336008 MHz

F2 - Processing parameters

SI 65536  
 SF 600.1300273 MHz  
 WDW EM  
 SSB 0  
 LB 0.30 Hz  
 GB 0  
 PC 1.00

1.395  
1.402  
1.410  
1.421  
1.433  
1.444  
1.457  
1.466  
1.471  
1.477  
1.482  
1.614  
1.625  
1.637  
1.649  
1.661  
1.760  
1.771  
1.783  
1.795  
1.806  
3.467  
3.478  
3.489  
3.524  
3.535  
3.547  
4.508

7.264  
7.272  
7.276  
7.286  
7.290  
7.296  
7.300  
7.309  
7.343  
7.353  
7.366  
7.375

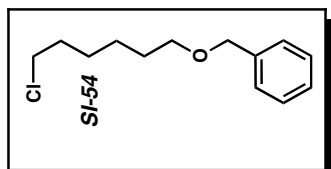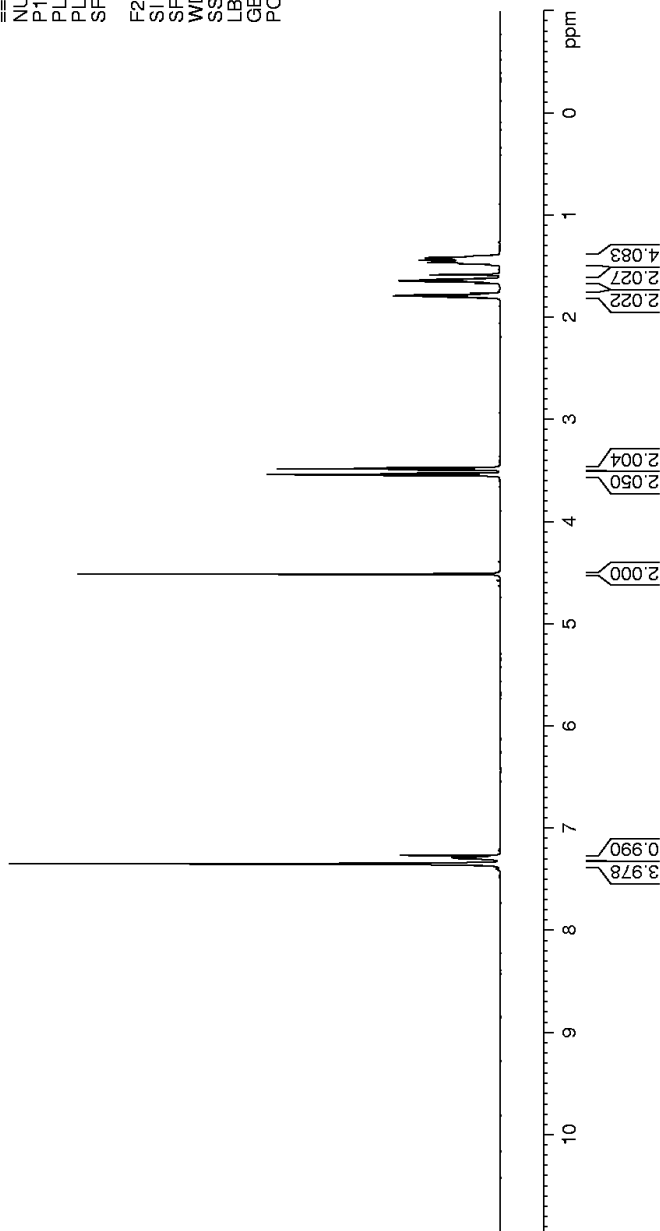

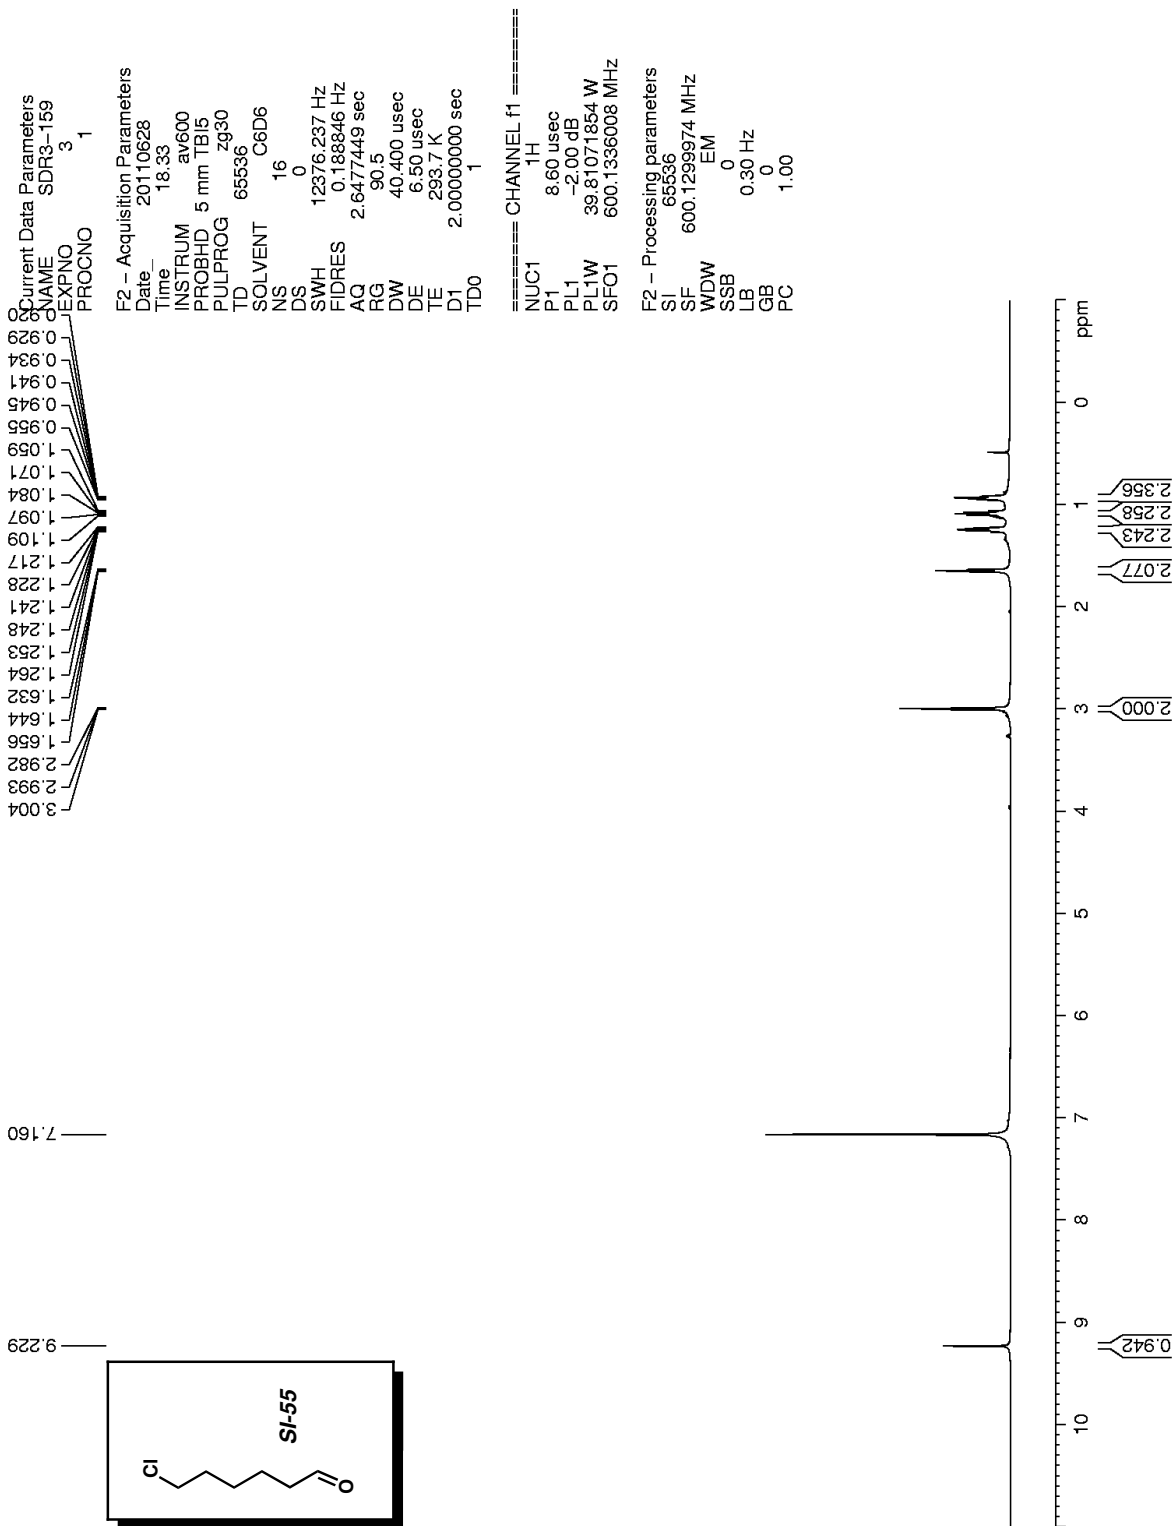

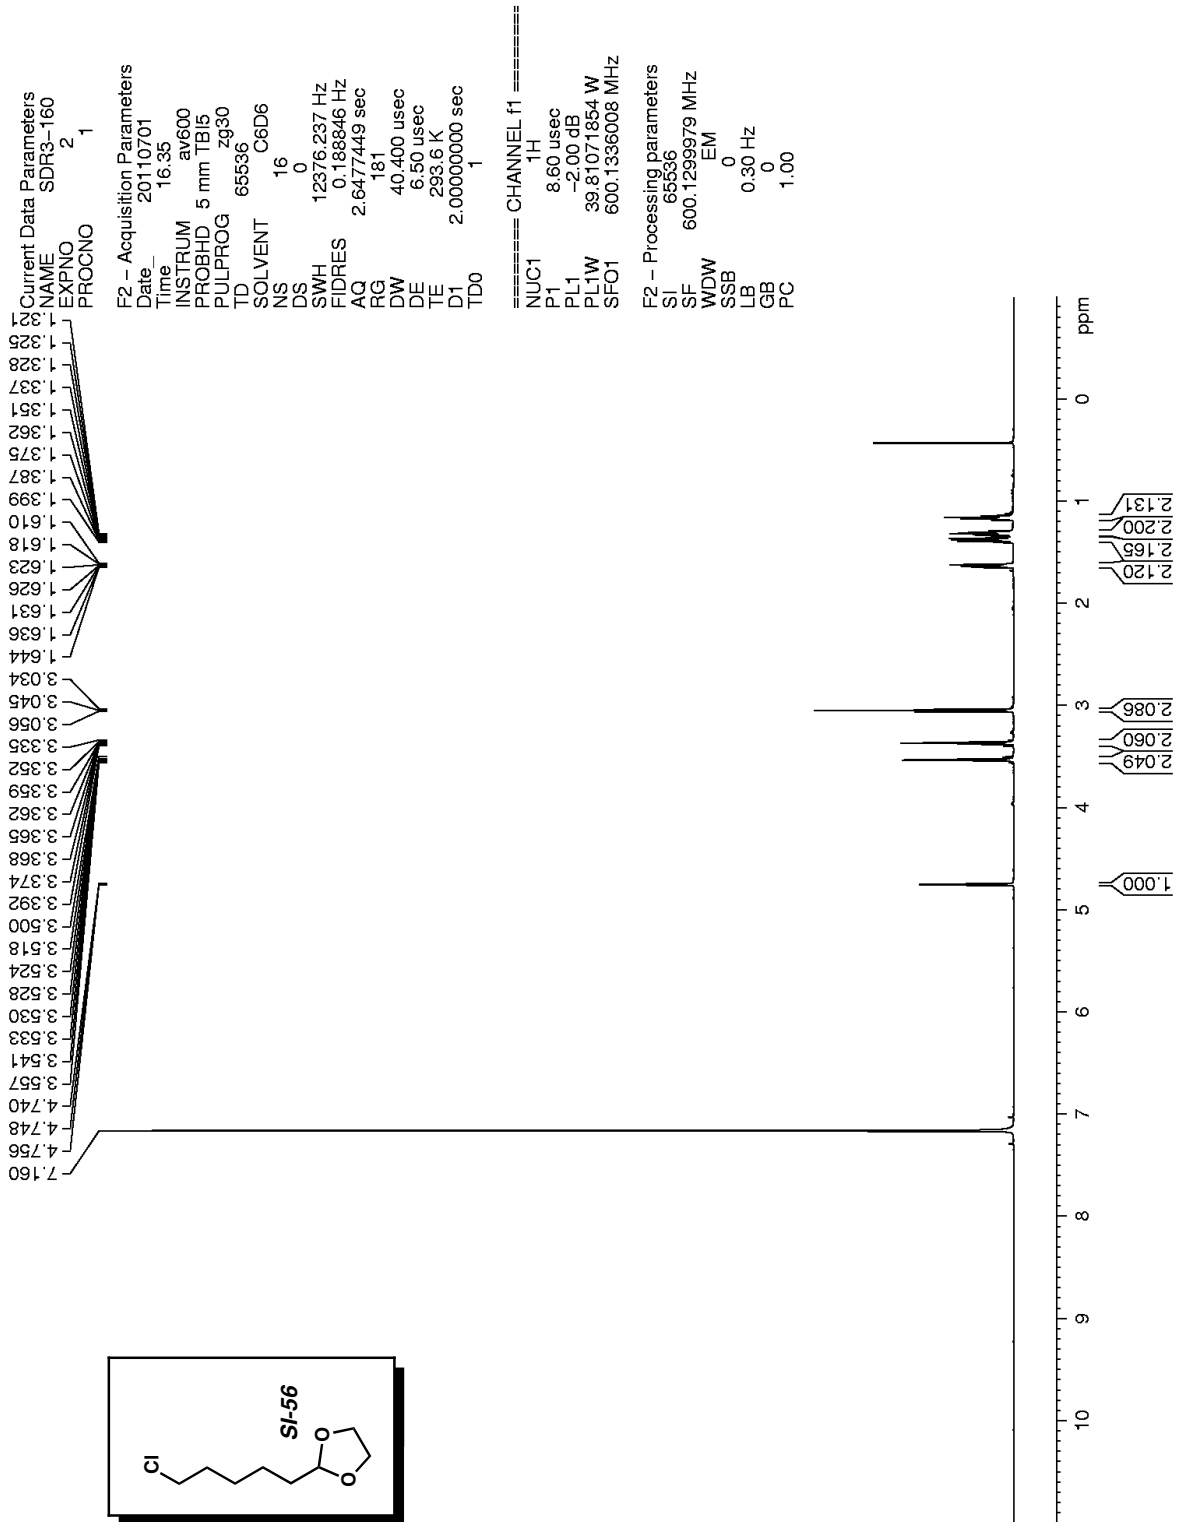

Current Data Parameters  
 NAME SDR4-076  
 EXPNO 2  
 PROCNO 1

F2 - Acquisition Parameters  
 Date\_ 20111114  
 Time 9.04  
 INSTRUM av300  
 PROBHD 5 mm PABBO BB/  
 PULPROG zg30  
 TD 65536  
 SOLVENT CDCI3  
 NS 16  
 DS 0  
 SWH 5995.204 Hz  
 FIDRES 0.091480 Hz  
 AQ 5.4657526 sec  
 RG 574.7  
 DW 83.400 usec  
 DE 6.50 usec  
 TE 297.8 K  
 D1 2.00000000 sec  
 TD0 1

==== CHANNEL f1 =====  
 NUC1 1H  
 P1 11.75 usec

F2 - Processing parameters  
 SI 65536  
 SF 300.1300119 MHz  
 WDW EM  
 SSB 0  
 LB 0.30 Hz  
 GB 0  
 PC 1.00

2.064  
 2.087  
 2.109  
 2.133  
 2.155  
 2.787  
 2.811  
 2.835  
 3.538  
 3.559  
 3.581

6.032  
 6.035  
 6.043  
 6.045  
 6.280  
 6.286  
 6.290  
 6.296  
 7.260  
 7.309  
 7.311  
 7.315  
 7.317

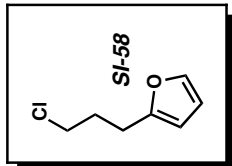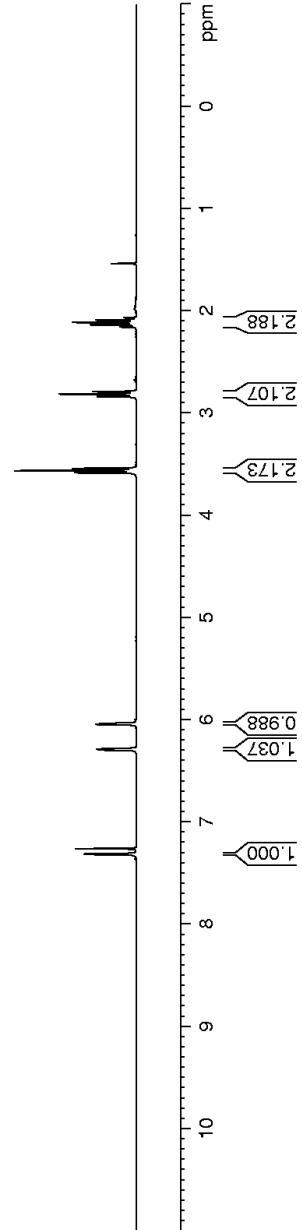

Current Data Parameters  
 NAME SDR4-072  
 EXPNO 3  
 PROCNO 1

F2 - Acquisition Parameters  
 Date\_ 20111107  
 Time 14.57  
 INSTRUM av600  
 PROBHD 5 mm BB5  
 PULPROG zgpg30  
 TD 65536  
 SOLVENT CDCI3  
 NS 30  
 DS 0  
 SWH 37593.984 Hz  
 FIDRES 0.573639 Hz  
 AQ 0.8716921 sec  
 RG 20642.5  
 DW 13.300 usec  
 DE 6.50 usec  
 TE 294.2 K  
 D1 2.00000000 sec  
 D11 0.03000000 sec  
 TD0 1

=====  
 CHANNEL f1  
 NUC1 13C  
 P1 9.75 usec  
 PL1 0.00 dB  
 PL1W 75.35659027 W  
 SFO1 150.9209173 MHz

=====  
 CHANNEL f2  
 CPDPRG2 waltz16  
 NUC2 1H  
 PCPD2 80.00 usec  
 PL2 -1.00 dB  
 PL12 14.14 dB  
 PL2W 31.62277603 W  
 PL12W 0.96827775 W

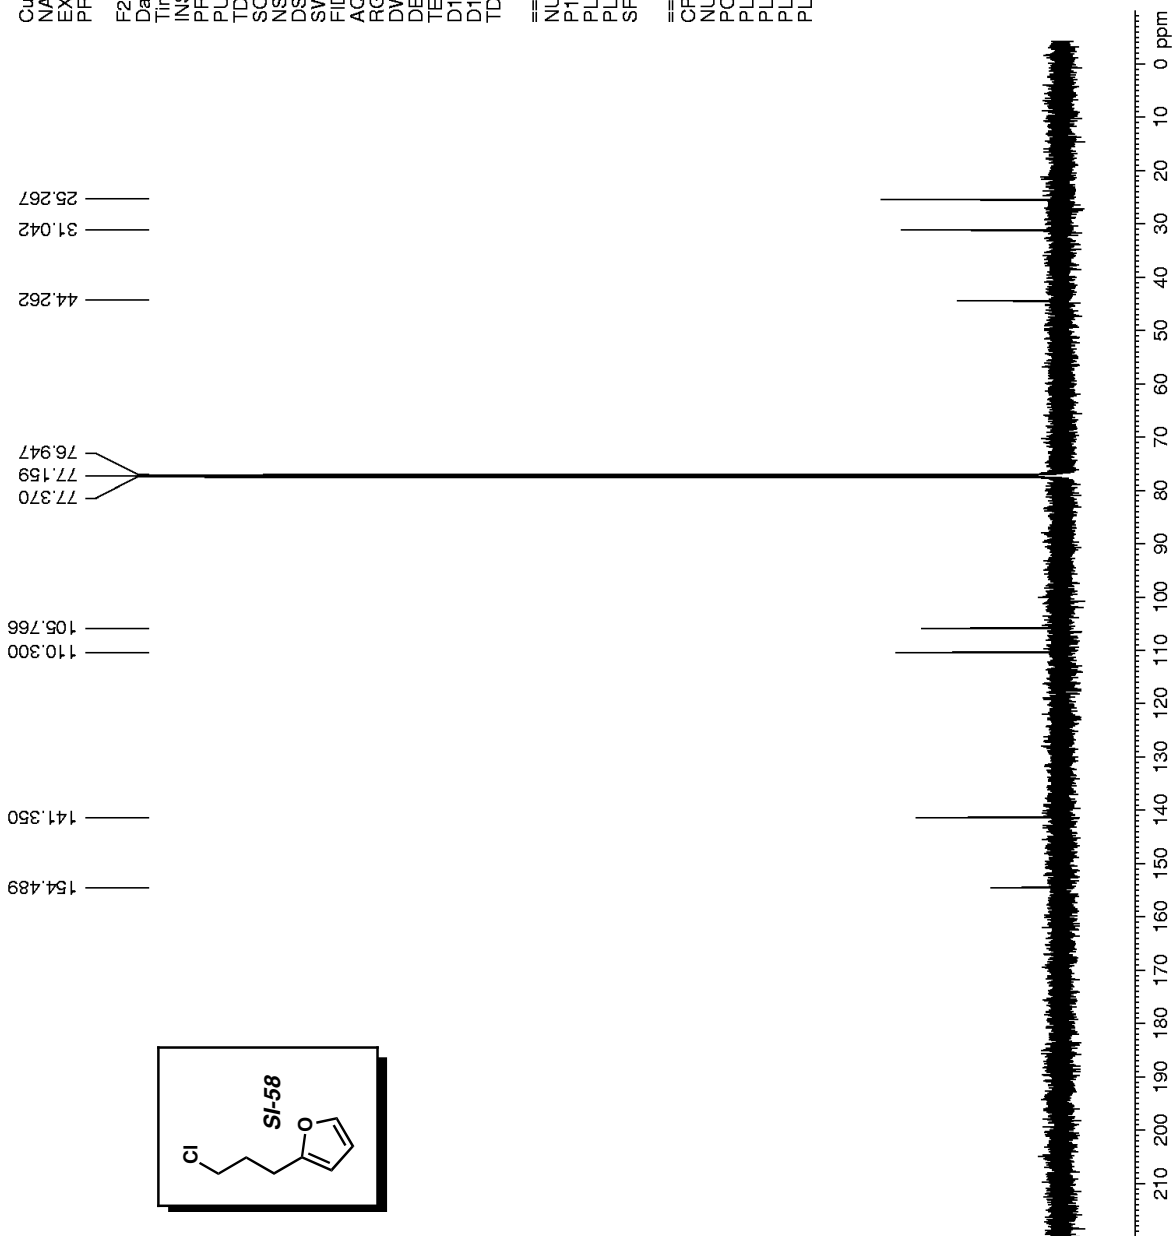

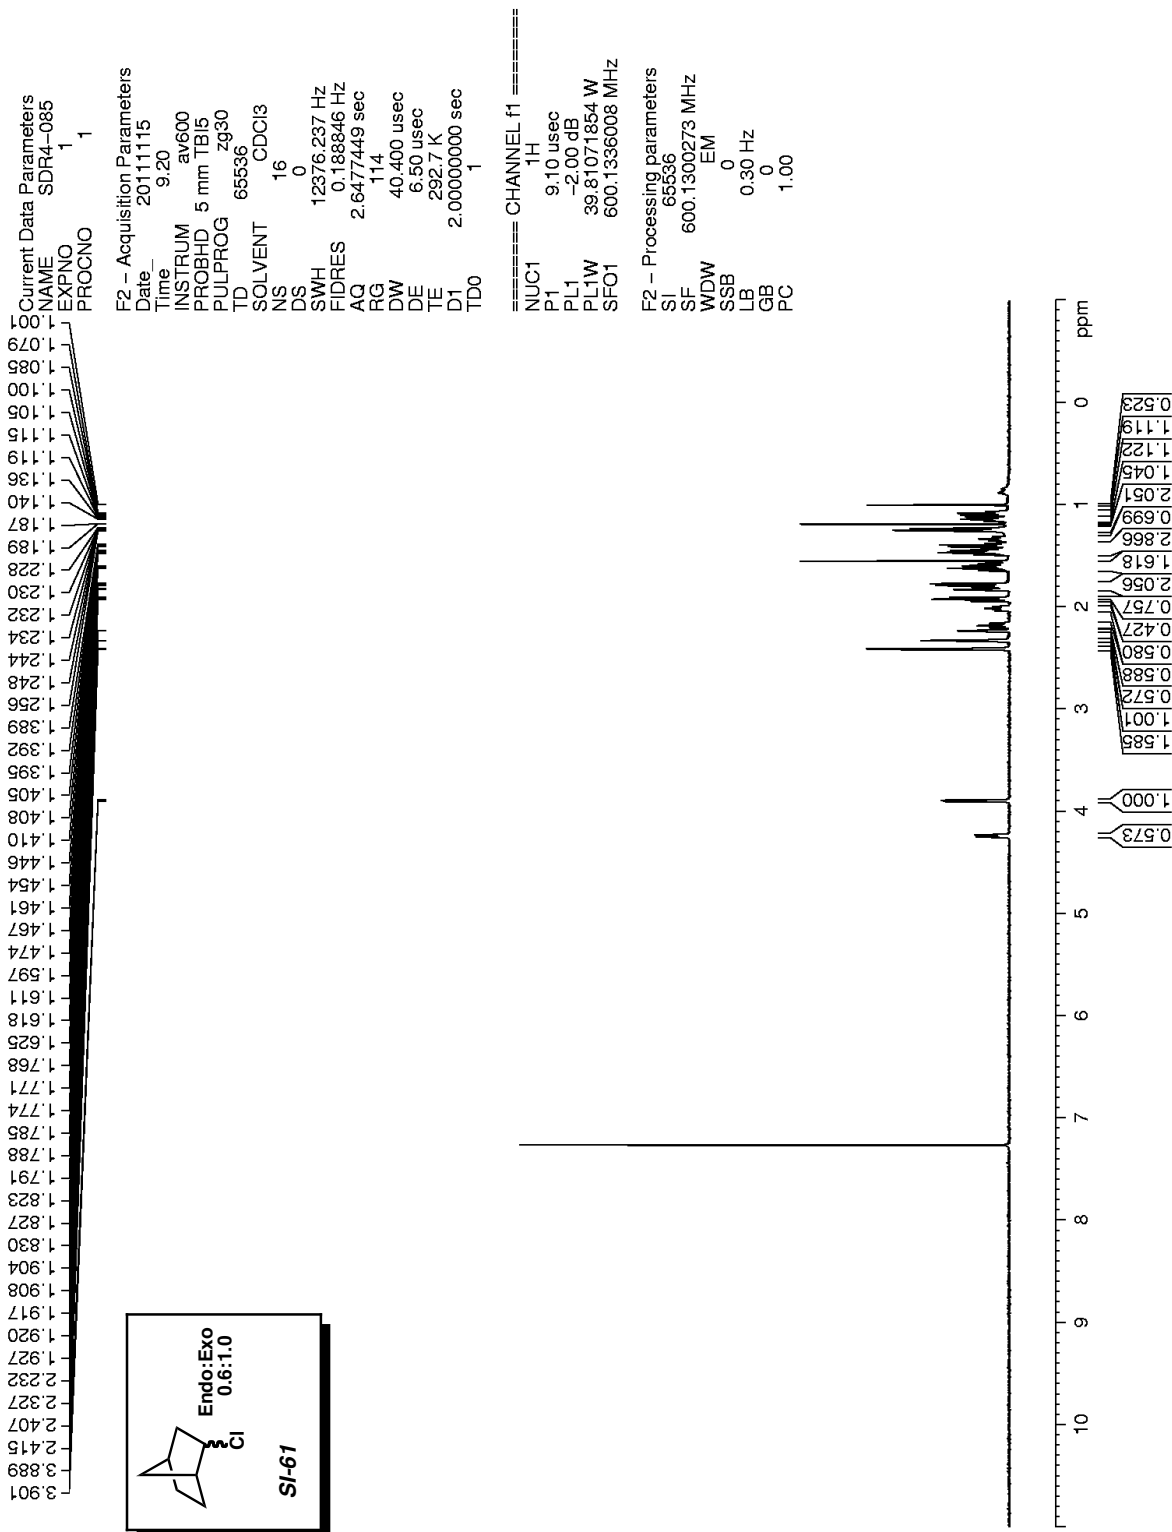



Current Data Parameters  
 NAME SDR4-032  
 EXPNO 12  
 PROCNO 1

F2 - Acquisition Parameters  
 Date\_ 20111005  
 Time 8:39  
 INSTRUM av300  
 PROBHD 5 mm PABBO BB/  
 PULPROG zgpg30  
 TD 65536  
 SOLVENT CDCI3  
 NS 126  
 DS 0  
 SWH 18832.393 Hz  
 FIDRES 0.287360 Hz  
 AQ 1.7400308 sec  
 RG 26008  
 DW 26.550 usec  
 DE 6.50 usec  
 TE 297.1 K  
 D1 2.00000000 sec  
 D11 0.03000000 sec  
 TDO 1

=====  
 CHANNEL f1  
 NUC1 13C  
 P1 7.00 usec

F2 - Processing parameters  
 SI 32768  
 SF 75.4677391 MHz  
 WDW EM  
 SSB 0  
 LB 1.00 Hz  
 GB 0  
 PC 1.40

26.881  
 28.264  
 35.234  
 36.674  
 43.739  
 46.164  
 62.664  
 76.737  
 77.160  
 77.583

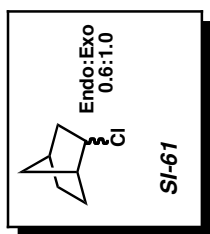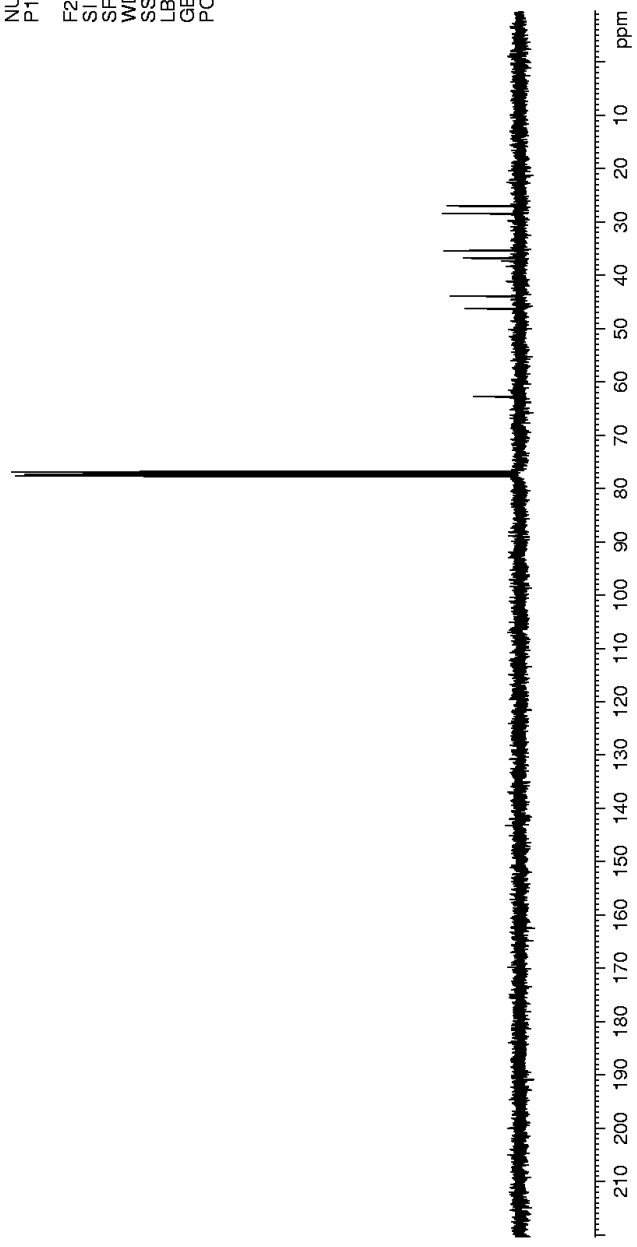

Current Data Parameters  
 NAME AS-III-166  
 EXPNO 1  
 PROCNO 1

F2 - Acquisition Parameters  
 Date\_ 20111213  
 Time 21.23  
 INSTRUM dirx500  
 PROBHD 5 mm bb-Z800  
 PULPROG zg30  
 TD 65536  
 SOLVENT CDCI3  
 NS 10  
 DS 0  
 SWH 10000.000 Hz  
 FIDRES 0.152588 Hz  
 AQ 3.2769001 sec  
 RG 181  
 DW 50.000 usec  
 DE 6.00 usec  
 TE 297.2 K  
 D1 2.00000000 sec  
 TD0 1

==== CHANNEL f1 =====  
 NUC1 1H  
 P1 12.25 usec  
 PL1 0.00 dB  
 SFO1 500.3330020 MHz

F2 - Processing parameters  
 SI 32768  
 SF 500.3300222 MHz  
 WDW EM  
 SSB 0  
 LB 0.30 Hz  
 GB 0  
 PC 1.00

1.186  
 1.200  
 1.214  
 1.252  
 1.265  
 1.279  
 2.189  
 3.362  
 3.376  
 3.390  
 3.404  
 3.435  
 3.448  
 3.462  
 3.475

6.988  
 7.005  
 7.133  
 7.138  
 7.150  
 7.155  
 7.185  
 7.190  
 7.260

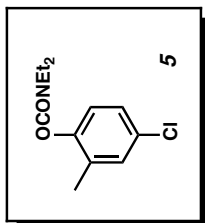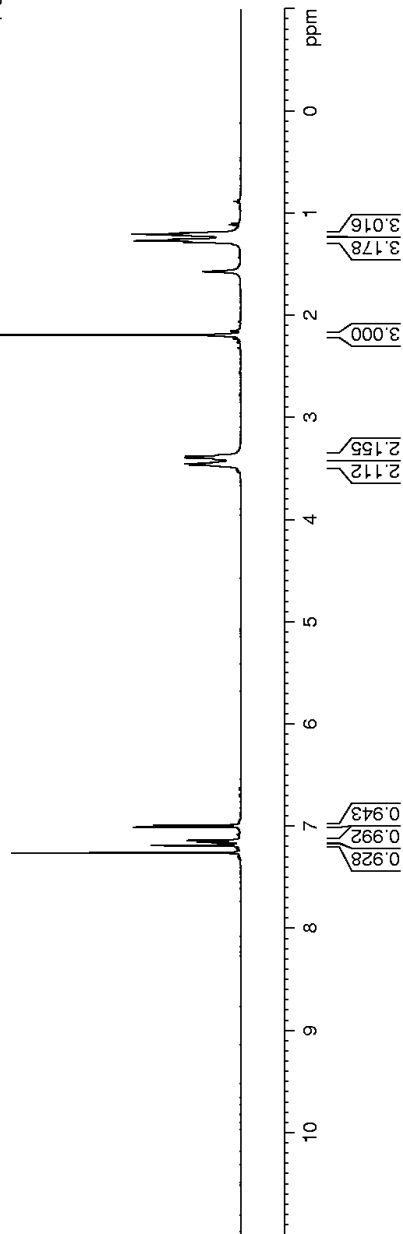

Current Data Parameters  
 NAME AS-III-189  
 EXPNO 1  
 PROCNO 1

F2 - Acquisition Parameters  
 Date\_ 20120112  
 Time 10.01  
 INSTRUM dirx500  
 PROBHD 5 mm bb-Z800  
 PULPROG zg30  
 TD 65536  
 SOLVENT CDCI3  
 NS 8  
 DS 0  
 SWH 10000.000 Hz  
 FIDRES 0.152588 Hz  
 AQ 3.2769001 sec  
 RG 128  
 DW 50.000 usec  
 DE 6.00 usec  
 TE 296.1 K  
 D1 2.00000000 sec  
 TD0 1

===== CHANNEL f1 =====  
 NUC1 1H  
 P1 12.25 usec  
 PL1 0.00 dB  
 SFO1 500.330020 MHz

F2 - Processing parameters  
 SI 32768  
 SF 500.3300219 MHz  
 WDW EM  
 SSB 0  
 LB 0.30 Hz  
 GB 0  
 PC 1.00

1.212  
1.226  
1.239  
1.265  
1.283  
1.297  
1.310  
1.310  
2.282  
2.392  
3.395  
3.409  
3.422  
3.435  
3.473  
3.486  
3.500

7.115  
7.132  
7.224  
7.240  
7.260  
7.374  
7.374  
7.379  
7.391  
7.395  
7.407  
7.410  
7.450  
7.453  
7.466

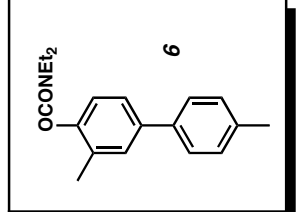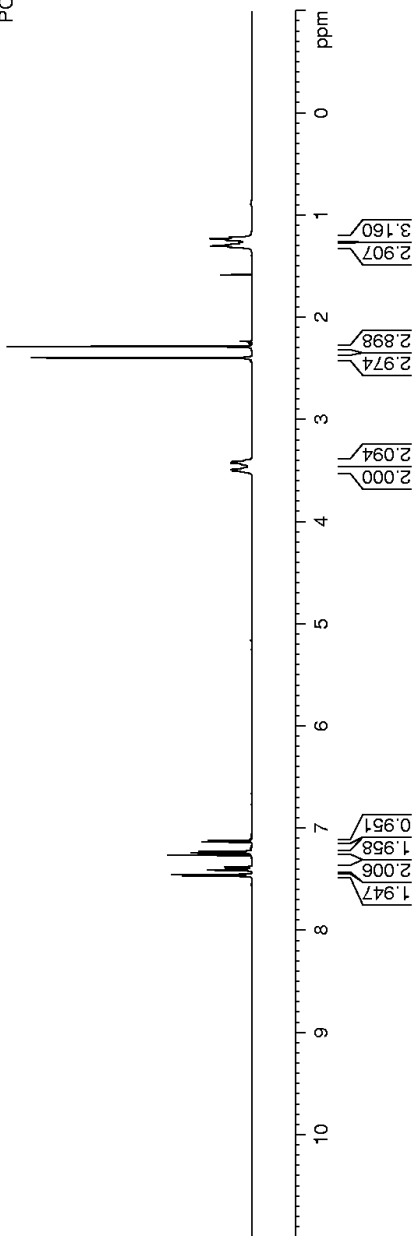

Current Data Parameters  
 NAME AS-III-192\_char  
 EXPNO 2  
 PROCNO 1

F2 - Acquisition Parameters  
 Date\_ 20120207  
 Time 12.18  
 INSTRUM dirx500  
 PROBHD 5 mm bb-Z800  
 PULPROG zgpg30  
 TD 65536  
 SOLVENT CDC13  
 NS 51  
 DS 0  
 SWH 32679.738 Hz  
 FIDRES 0.498663 Hz  
 AQ 1.0027661 sec  
 RG 13004  
 DW 15.300 usec  
 DE 6.00 usec  
 TE 298.2 K  
 D1 2.00000000 sec  
 d11 0.03000000 sec  
 TD0 1

=====  
 CHANNEL f1  
 NUC1 13C  
 P1 6.20 usec  
 PL1 0.00 dB  
 SFO1 125.8231939 MHz

=====  
 CHANNEL f2  
 CPDPRG2 waltz16  
 NUC2 1H  
 PCPD2 100.00 usec  
 PL2 120.00 dB  
 PL12 16.10 dB  
 SFO2 500.3320013 MHz

F2 - Processing parameters

21.206  
 16.625  
 14.442  
 13.576

42.404  
 42.043

77.414  
 77.160  
 76.906

154.144  
 149.460  
 138.502  
 138.087  
 136.911  
 130.684  
 129.698  
 129.523  
 127.080  
 125.507  
 122.558

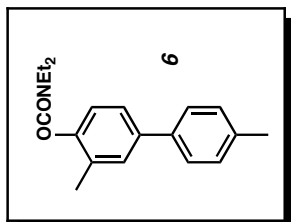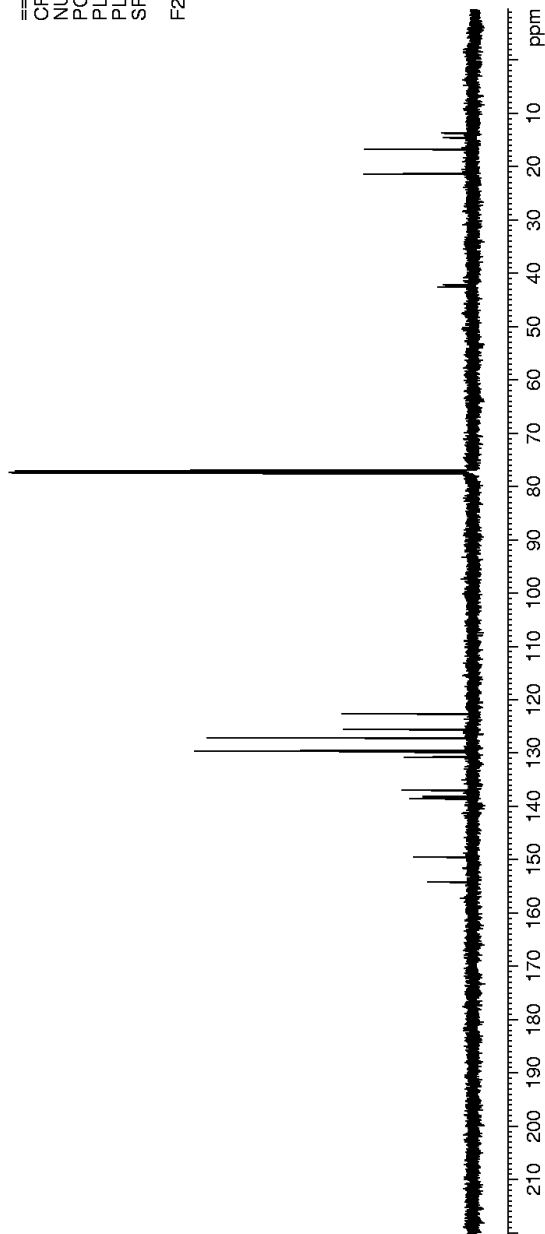

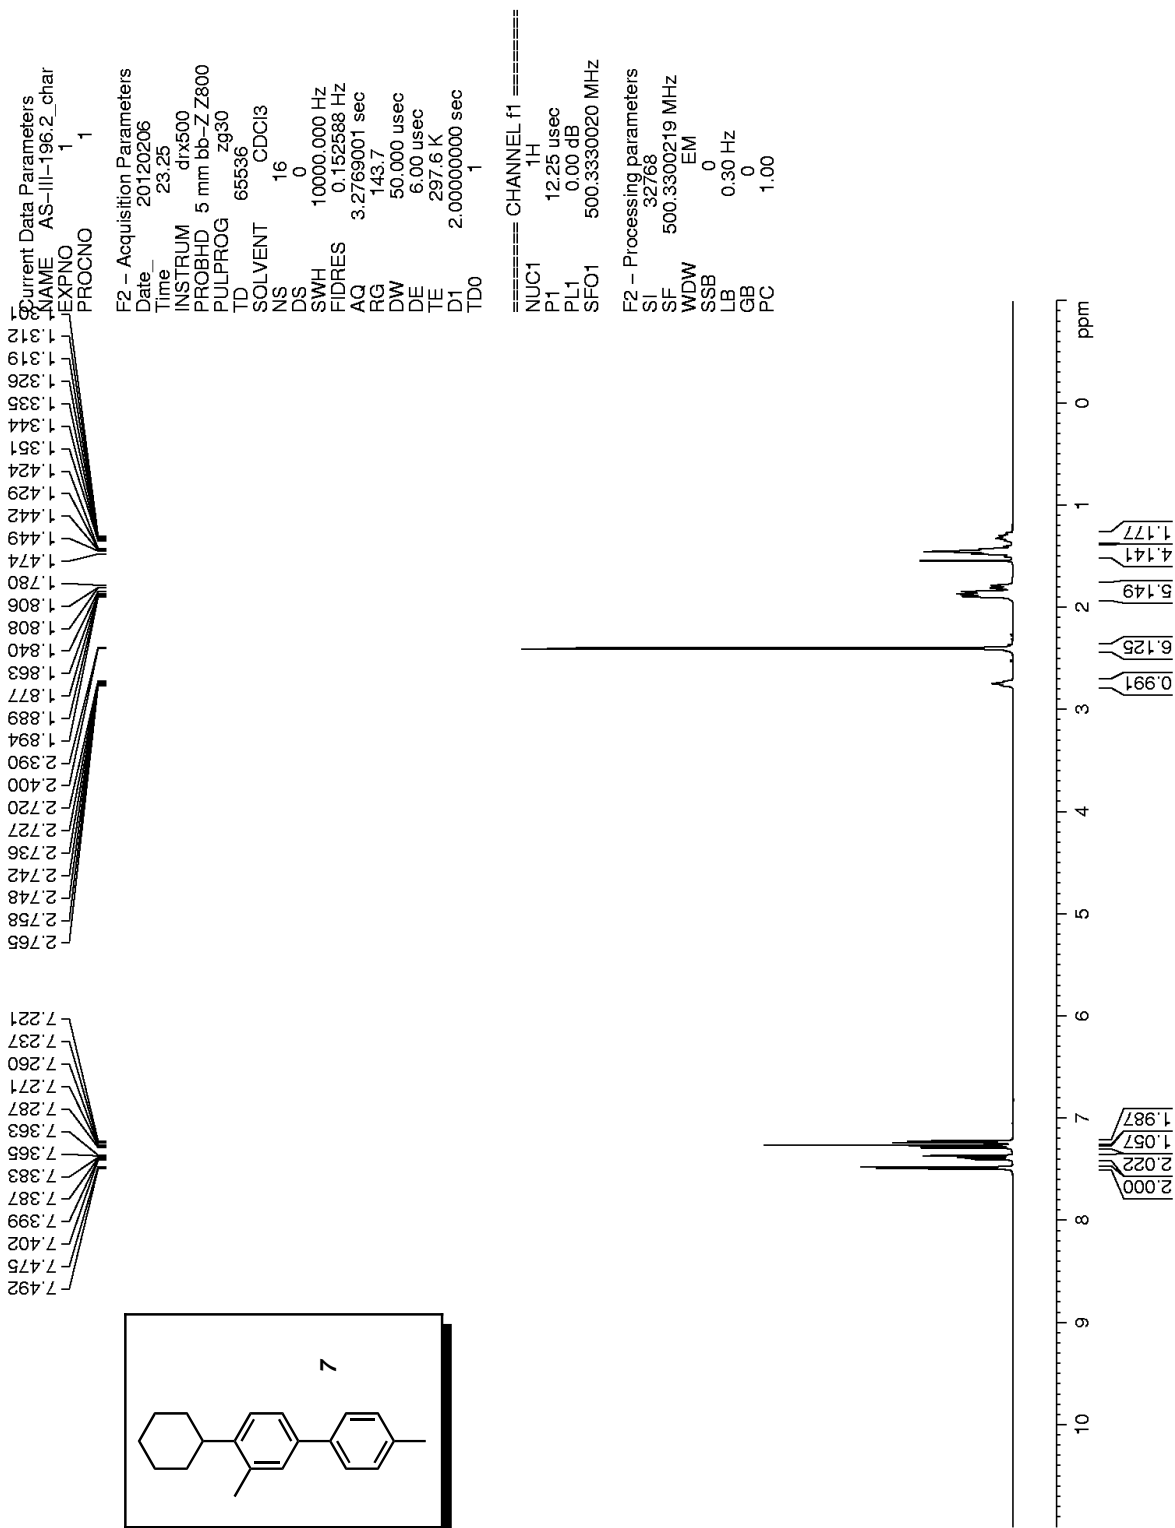

Current Data Parameters  
 NAME AS-III-196.1\_char  
 EXPNO 2  
 PROCNO 1

F2 - Acquisition Parameters  
 Date\_ 20120206  
 Time 23.18  
 INSTRUM dirx500  
 PROBHD 5 mm bb-Z800  
 PULPROG zgpg30  
 TD 65536  
 SOLVENT CDCI3  
 NS 65  
 DS 0  
 SWH 32679.738 Hz  
 FIDRES 0.498663 Hz  
 AQ 1.0027661 sec  
 RG 4096  
 DW 15.300 usec  
 DE 6.00 usec  
 TE 298.1 K  
 D1 2.00000000 sec  
 d11 0.03000000 sec  
 TD0 1

==== CHANNEL f1 =====  
 NUC1 13C  
 P1 6.20 usec  
 PL1 0.00 dB  
 SFO1 125.8231939 MHz

==== CHANNEL f2 =====  
 CPDPRG2 waltz16  
 NUC2 1H  
 PCPD2 100.00 usec  
 PL2 120.00 dB  
 PL12 16.10 dB  
 SFO2 500.3320013 MHz

F2 - Processing parameters

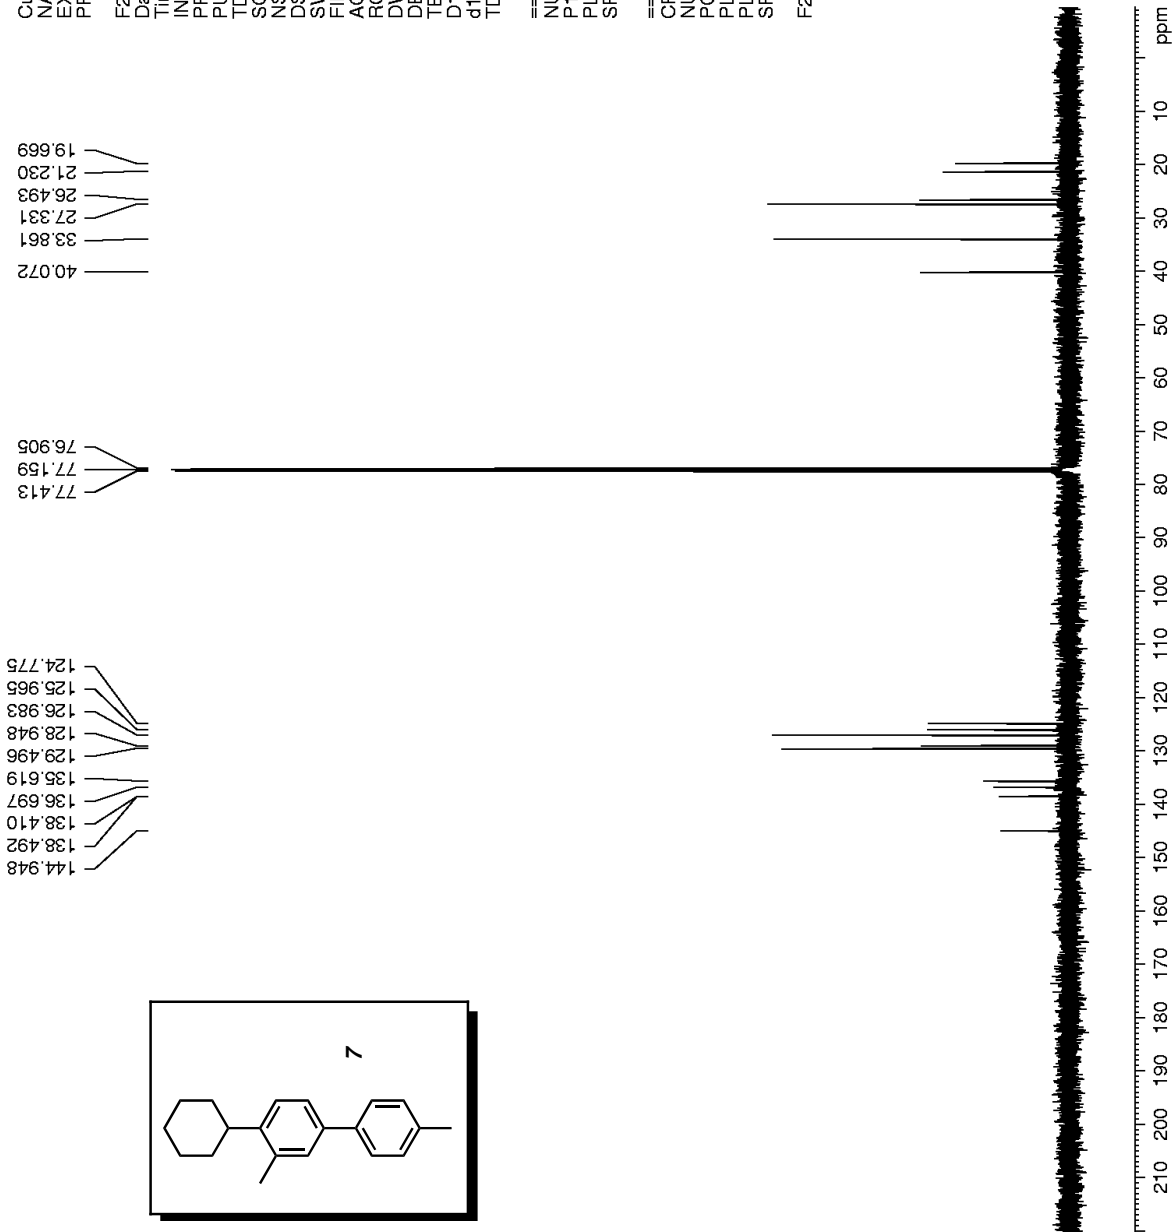

## References

---

- <sup>1</sup> Love, B. E.; Jones, E. G. *J. Org. Chem.* **1999**, *64*, 3755–3756.
- <sup>2</sup> a) King, J. F.; Lee, T. M. *Can. J. Chem.* **1981**, *59*, 356–361. b) Quasdorf, K. W.; Riener, M.; Petrova, K.; Garg, N. K. *J. Am. Chem. Soc.* **2009**, *131*, 17748–17749. c) Seganish, W. M.; DeShong, P. *J. Org. Chem.* **2004**, *69*, 6790–6795. d) Bedford, R. B.; Webster, R. L.; Mitchel, C. J. *Org. Biomol. Chem.* **2009**, *7*, 4853–4857. e) Leowanawat, P.; Zhang, N.; Percec, V. *J. Org. Chem.* **2012**, *77*, 1018–1025. f) Azzena, U.; Pisano, L.; Pittalis, M. *Appl. Organometal. Chem.* **2008**, *22*, 525–528. g) Mesganaw, T.; Silberstein, A. L.; Ramgren, S. D.; Fine Nathel, N.; Hong, X.; Liu, P.; Garg, N. K. *Chem. Sci.* **2011**, *2*, 1766–1771. h) Van Doorn, A. R.; Bos, M.; Markema, S.; van Eerden, J.; Verboom, W.; Reinhoudt, D. N. *J. Org. Chem.* **1991**, *56*, 2371–2380. i) Ramgren, S. D.; Silberstein, A. L.; Yang, Y.; Garg, N. K. *Angew. Chem. Int. Ed.* **2011**, *50*, 2171–2173. j) Jutand, A.; Moshely, A. *J. Org. Chem.* **1997**, *62*, 261–274. k) Miller, R. E.; Rantanen, T.; Ogilvie, K. A.; Groth, U.; Snieckus, V. *Org. Lett.* **2010**, *12*, 2198–2201. l) Quasdorf, K. W.; Antoft-Finch, A.; Liu, P.; Silberstein, A. L.; Komaromi, A.; Blackburn, T.; Ramgren, S. D.; Houk, K. N.; Snieckus, V.; Garg, N. K. *J. Am. Chem. Soc.* **2011**, *133*, 6352–6363. m) Leowanawat, P.; Zhang, N.; Resmerita, A. M.; Rossen, B. M.; Percec, V. *J. Org. Chem.* **2011**, *76*, 9946–9955. n) Snieckus, V.; Mukund, S. *J. Org. Chem.* **1983**, *48*, 1935–1937.
- <sup>3</sup> Kondolff, I.; Doucet, H.; Santelli, M. *Organometallics* **2006**, *25*, 5219–5222.
- <sup>4</sup> Yang, C.-T.; Zhang, Z.-Q.; Liu, Y.-C.; Liu, L. *Angew. Chem. Int. Ed.* **2011**, *50*, 3904–3907.
- <sup>5</sup> Fürstner, A.; Martin, R.; Krause, H.; Seidel, G.; Goddard, R.; Lehmann, C. W. *J. Am. Chem. Soc.* **2008**, *130*, 8773–8787.
- <sup>6</sup> Ackermann, L.; Kapdi, A. R.; Schulzke, C. *Org. Lett.* **2010**, *12*, 2298–2301.
- <sup>7</sup> Krüger, T.; Vorndran, K.; Linker, T. *Chem. Eur. J.* **2009**, *15*, 12082–12091.
- <sup>8</sup> Wei, X.; Johnson, P.; Taylor, R. J. K. *J. Chem. Soc., Perkin Trans. 1* **2000**, 1109–1116.
- <sup>9</sup> Frisch, A. C.; Rataboul, F.; Zapf, A.; Beller, M. *J. Organomet. Chem.* **2003**, *687*, 403–409.
- <sup>10</sup> Gros, P.; Fort, Y.; Caubère, P. *J. Chem. Soc., Perkin Trans. 1* **1997**, 3597–3600.
- <sup>11</sup> Getmanenko, Y. A.; Twieg, R. J. *J. Org. Chem.* **2008**, *73*, 830–839.
- <sup>12</sup> Miyaura, N.; Ishiyama, T.; Sasaki, H.; Ishikawa, M.; Sato, M.; Suzuki, A. *J. Am. Chem. Soc.* **1989**, *111*, 314–321.
- <sup>13</sup> Czaplik, W. M.; Mayer, M.; Von Wangelin, A. J. *Synlett* **2009**, *18*, 2931–2934.
- <sup>14</sup> Melzig, L.; Diène, C. R.; Rohbogner, C. J.; Knochel, P. *Org. Lett.* **2011**, *13*, 3174–3177.
- <sup>15</sup> Aurell, G.; Soma Sekhar, B. B. V. *Tetrahedron* **1995**, *51*, 1483–1494.

<sup>16</sup> Alonso, E.; Ramon, D. J.; Yus, M. *Anales de Química* **1998**, *94*, 56–59.

<sup>17</sup> For alternative preparation, see: Casares, J. A.; Espinet, P.; Martín-Allvarez, J. M.; Martínez-Illarduya, J. M.; Salas, G. *Eur. J. Inorg. Chem.* **2005**, 3825–3831.

<sup>18</sup> Bach, R. D.; Holubka, J. W.; Taaffee, T. H. *J. Org. Chem.* **1979**, *44*, 35–38.

<sup>19</sup> For alternative preparation, see: Rieke, R. D.; Bales, S. E. *J. Chem. Soc., Chem. Commun.* **1973**, 879–880.

<sup>20</sup> Snieckus, V.; Mukund, S. *J. Org. Chem.* **1983**, *48*, 1935–1937.

<sup>21</sup> Azzena, U.; Disano, L.; Pittalis, M. *Appl. Organometal. Chem.* **2008**, *22*, 525–528.
